# Supplementary material for: Syntheses of allene-modified derivatives of peridinin toward elucidation of the effective role of the allene function in high energy transfer efficiencies in photosynthesis
Source: Royal Society of Chemistry journal article supplement (doi:10.1039/b907456b), 2009-01-01

**General.** All commercially available reagents were used without further purification. All solvents were used after distillation. Tetrahydrofuran (THF), diethyl ether, benzene, toluene, and dimethoxyethane (DME) were refluxed over and distilled from sodium-benzophenone ketyl. Dichloromethane was refluxed over and distilled from P<sub>2</sub>O<sub>5</sub>. Dimethylformamide (DMF), dimethyl sulfoxide (DMSO), and hexamethylphosphoric triamide (HMPA) were distilled from CaH<sub>2</sub> under reduced pressure. Methanol was refluxed over and distilled from Mg(OMe)<sub>2</sub>. Triethylamine, diisopropylamine, and diisopropylethylamine were refluxed over and distilled from KOH. Preparative separation was performed by column chromatography on silica gel. <sup>1</sup>H NMR and <sup>13</sup>C NMR spectra were recorded on a 400MHz and 750 MHz spectrometer and chemical shifts were represented as δ-values relative to the internal standard TMS. IR spectra were recorded on a FT-IR Spectrometer. High-resolution mass spectra (HRMS) were measured on a ESI-TOF MS. Melting point was uncorrected.

**(1S,2R,4S)-4-Acetoxy-1,2-Epoxy-1-ethynyl-2,6,6-trimethylcyclohexanol (15).** To a solution of acetylene **14** (215 mg, 1.21 mmol) in pyridine (5 mL) was added acetic anhydride (0.18 mL, 1.94 mmol) at room temperature and the reaction mixture was stirred for 18 h at the same temperature. A saturated aqueous CuSO<sub>4</sub> solution was added, and then the resulting mixture was extracted with ethyl acetate. The organic layers were combined, washed with brine, dried over MgSO<sub>4</sub>, filtered and concentrated *in vacuo*. Purification by silica gel column chromatography (5% ethyl acetate in hexane) afforded acetate **15** (209 mg, 77%): [α]<sub>D</sub><sup>24.0</sup> -20.3 (*c* 1.18, CHCl<sub>3</sub>); IR (neat, cm<sup>-1</sup>) 3281, 2966, 2930, 2872, 1738, 1460, 1367, 1242, 1157, 1105, 1043; <sup>1</sup>H NMR (CDCl<sub>3</sub>, 400 MHz) δ 4.85 (m, 1H), 2.42 (s, 1H), 2.37 (dd, *J* = 15.1, 5.7 Hz, 1H), 2.01 (s, 3H), 1.79 (dd, *J* = 15.1, 6.4 Hz, 1H), 1.60 (dd, *J* = 13.8, 3.4 Hz, 1H), 1.52 (s, 3H), 1.38 (dd, *J* = 13.5, 8.24 Hz, 1H), 1.27 (s, 3H), 1.16 (s, 3H); <sup>13</sup>C NMR (CDCl<sub>3</sub>, 100 MHz) δ 170.1, 80.2, 74.2, 66.9, 64.9, 63.1, 39.7, 35.6, 33.5, 28.4, 25.9, 21.7, 21.3; ESI-HRMS *m/z* calcd for C<sub>13</sub>H<sub>18</sub>O<sub>3</sub>Na (M+Na)<sup>+</sup> 245.1154, found 245.1164.

**(2E,4E)-7-[(1'S,2'R,4'S)-4'-Acetoxy-1',2'-Epoxy-2',6',6'-trimethylcyclohexa-1'-yl]5-methylhepta-2,4-diene-6-yn-1-ol (18).** To a solution of ester **16** (1.11 g, 1.89 mmol) in dichloromethane (18.9 mL) was added dropwise diisobutylaluminium hydride (1.0 M in toluene, 4.56 mL, 4.56 mmol) at -78 °C. After the reaction mixture was

stirred for 5 min at the same temperature, aqueous potassium sodium (+)-tartrate tetrahydrate solution were added and then resulting mixture was extracted with ethyl acetate. The organic layers were combined, washed with brine, dried over  $\text{MgSO}_4$ , filtered and concentrated *in vacuo* to afford crude vinyl iodide **17**, which was used to the next reaction without further purification.

To a solution of crude vinyl iodide **17** and acetylene **15** (420 mg, 1.89 mmol) in diisopropylamine (9.45 mL) was added tetrakis(triphenylphosphine)palladium (262 mg, 0.23 mmol) and  $\text{CuI}$  (40 mg, 0.21 mmol). After being stirred for 1.5 h at room temperature, the reaction mixture was poured into a saturated aqueous  $\text{NH}_4\text{Cl}$  solution, and then the resulting mixture was extracted with diethyl ether. The organic layers were combined, dried over  $\text{MgSO}_4$ , filtered and concentrated *in vacuo*. Purification by silica gel column chromatography (from 30% to 50% ethyl acetate in hexane) afforded the conjugated acetylene derivative **18** (484 mg, 81%):  $[\alpha]^{24.0}_{\text{D}} +15.1$  (*c* 1.07,  $\text{CHCl}_3$ ); IR (neat,  $\text{cm}^{-1}$ ) 3458, 2965, 2926, 1738, 1448, 1370, 1244, 1043;  $^1\text{H}$  NMR ( $\text{CDCl}_3$ , 400 MHz)  $\delta$  6.50 (dd, *J* = 14.8, 11.4 Hz, 1H), 6.39 (d, *J* = 11.2 Hz, 1H), 5.90 (dt, *J* = 14.9, 5.5 Hz, 1H), 4.87 (m, 1H), 4.23 (d, *J* = 5.5 Hz, 2H), 2.38 (dd, *J* = 14.9, 5.7 Hz, 1H), 2.01 (s, 3H), 1.91 (s, 3H), 1.80 (dd, *J* = 14.8, 6.4 Hz, 1H), 1.62 (dd, *J* = 13.8, 3.5 Hz, 1H), 1.51 (s, 3H), 1.39 (dd, *J* = 13.5, 8.3 Hz, 1H), 1.27 (s, 3H), 1.16 (s, 3H);  $^{13}\text{C}$  NMR ( $\text{CDCl}_3$ , 100 MHz)  $\delta$  170.3, 135.4, 134.2, 125.9, 118.0, 89.3, 85.5, 67.1, 65.6, 63.9, 62.9, 39.8, 35.7, 34.0, 28.6, 26.1, 21.9, 21.3, 17.4; ESI-HRMS *m/z* calcd for  $\text{C}_{19}\text{H}_{26}\text{O}_4\text{Na}$  ( $\text{M}+\text{Na}$ ) $^+$  341.1729, found 341.1740.

**2-[[[(2'E,4'E)-7'-((1'S,2''R,4''S)-4''-Acetoxy-1'',2''-Epoxy-2'',6'',6''-trimethylcyclohexylidene-1''-yl)-5'-methylhepta-2,4-diene-6-yn)sulfanyl]benzothiazole (19).** To a solution of **18** (100 mg, 0.31 mmol), 2-mercaptobenzothiazole (68 mg, 0.41 mmol) and triphenylphosphine (107 mg, 0.41 mmol) in THF (4 mL) was added dropwise diisopropyl azodicarboxylate (0.09 mL, 0.44 mmol) at 0 °C. The reaction mixture was stirred for 1 h at room temperature and the all solvents were removed *in vacuo*. To a residue was added diethyl ether and the precipitate was removed by filtration through a pad of Celite to give the crude products as a solution, which was concentrated *in vacuo*. Purification by short silica gel column chromatography (from 5% to 10% ethyl acetate in hexane) afforded the thioether **19** (127 mg, 87%):  $[\alpha]^{26.0}_{\text{D}} +8.5$  (*c* 0.97,  $\text{CHCl}_3$ ); IR (neat,  $\text{cm}^{-1}$ ) 2967, 2926, 1736, 1460,

1427, 1367, 1242, 1042;  $^1\text{H}$  NMR ( $\text{CDCl}_3$ , 400 MHz)  $\delta$  7.87 (m, 1H), 7.75 (m, 1H), 7.42 (m, 1H), 7.30 (m, 1H), 6.60 (dd,  $J = 14.9, 11.2$  Hz, 1H), 6.36 (d,  $J = 11.5$  Hz, 1H), 5.93 (m, 1H), 4.87 (m, 1H), 4.08 (d,  $J = 7.6$  Hz, 2H), 2.37 (ddd,  $J = 14.9, 5.7, 0.9$  Hz, 1H), 2.00 (s, 3H), 1.89 (s, 3H), 1.79 (dd,  $J = 15.1, 6.6$  Hz, 1H), 1.61 (m, 1H), 1.48 (s, 3H), 1.38 (dd,  $J = 13.7, 8.2$  Hz, 1H), 1.24 (s, 3H), 1.14 (s, 3H);  $^{13}\text{C}$  NMR ( $\text{CDCl}_3$ , 100 MHz)  $\delta$  170.3, 165.8, 153.2, 135.4, 135.0, 129.8, 128.9, 126.1, 124.3, 121.5, 120.9, 118.9, 89.2, 86.1, 67.1, 65.6, 63.9, 39.9, 35.9, 34.1, 28.7, 26.2, 21.9, 21.4, 17.5, -0.02; ESI-HRMS  $m/z$  calcd for  $\text{C}_{26}\text{H}_{29}\text{NO}_3\text{S}_2\text{Na}$  ( $\text{M}+\text{Na}$ ) $^+$  490.1487, found 490.1467.

**2-((((2'E,4'E)-7'-((1'S,2'R,4'S)-4''-Acetoxy-1'',2''-Epoxy-2'',6'',6''-trimethylcyclohexylidene-1''-yl)-5'-methylhepta-2,4-diene-6-yn)sulfonyl)benzothiazole (6).** To a solution of the thioether **19** (133 mg, 0.28 mmol) in ethanol (3 mL) was added dropwise a solution of ammonium heptamolybdate tetrahydrate (527 mg, 0.43 mmol) in hydrogen peroxide (30 wt.% in water, 1.4 mL) at 0 °C. After being stirred for 30 min at room temperature, the reaction mixture was poured into water and then extracted with diethyl ether. The organic layers were combined, dried over  $\text{MgSO}_4$ , filtered and concentrated *in vacuo*. Purification by short silica gel column chromatography afforded the sulfone **6** (from 10% to 20% ethyl acetate in hexane) (79 mg, 58%):  $[\alpha]^{24.0}_{\text{D}}$  +9.6 ( $c$  0.29,  $\text{CHCl}_3$ ); IR (neat,  $\text{cm}^{-1}$ ) 2967, 2928, 1736, 1472, 1368, 1333, 1244, 1150, 1028;  $^1\text{H}$  NMR ( $\text{CDCl}_3$ , 400 MHz)  $\delta$  8.23 (m, 1H), 8.02 (m, 1H), 7.64 (m, 2H), 6.46 (dd,  $J = 14.9, 11.5$  Hz, 1H), 6.31 (d,  $J = 11.4$  Hz, 1H), 5.69 (m, 1H), 4.87 (m, 1H), 4.31 (d,  $J = 7.8$  Hz, 2H), 2.37 (dd,  $J = 15.1, 5.7$  Hz, 1H), 2.01 (s, 3H), 1.78 (dd,  $J = 15.1, 6.4$  Hz, 1H), 1.72 (s, 3H), 1.60 (m, 1H), 1.47 (s, 3H), 1.37 (dd,  $J = 13.7, 8.4$  Hz, 1H), 1.23 (s, 3H), 1.13 (s, 3H);  $^{13}\text{C}$  NMR  $\text{CDCl}_3$ , 100 MHz)  $\delta$  170.3, 165.4, 152.6, 135.7, 134.0, 128.1, 127.7, 125.4, 122.4, 121.5, 117.7, 88.7, 87.3, 67.1, 65.7, 63.8, 58.7, 39.9, 35.8, 34.1, 28.6, 26.2, 21.9, 21.4, 17.5, -0.02; ESI-HRMS  $m/z$  calcd for  $\text{C}_{26}\text{H}_{29}\text{NO}_5\text{S}_2\text{Na}$  ( $\text{M}+\text{Na}$ ) $^+$  522.1385, found 522.1381.

**Peridinin Derivative B (2).** To a solution of acetylene segment **6** (22 mg, 0.044 mmol) and ylidenebutenolide segment **5** (15 mg, 0.044 mmol) in THF (0.87 mL) was added dropwise sodium bis(trimethylsilyl)amide (1.0M in THF, 0.12 mL, 0.12 mmol) at -78 °C in the dark. After being stirred for 5 min at the same temperature, the reaction

mixture was poured into water and then extracted with ethyl acetate. The organic layers were combined, washed with brine, dried over  $\text{MgSO}_4$ , filtered and concentrated *in vacuo*. Purification by short silica gel column chromatography (from 30% to 50% ethyl acetate in hexane) in the dark afforded peridinin derivative **2** (5 mg, 18%) as a mixture of the isomers as a red film. A solution of a mixture of all-*trans*-peridinin derivative **2** and its *cis*-isomer in benzene was left at room temperature in the fluorescence light. After 11 days, partial separation by preparative HPLC [column: Develosil CN-UG (0.6 x 25 cm); mobile phase: acetone / *n*-hexane = 1 / 10; flow rate: 2.0 mL / min.; UVdetect: 438 nm; retention time: (all-*trans*-isomer) 51 min., (9Z, 13E-isomer) 58 min.] in the dark, and HPLC [column: YMC Carotenoid C30 (10 x 250 mm); reverse phase: acetonitrile / methanol / water = 50 / 48 / 2; flow rate: 2.0 mL / min.; UVdetect: 438 nm; retention time: (all-*trans*-isomer) 22 min.] in the dark, was afforded the desired optically active peridinin derivative **2** as a red film: IR (neat,  $\text{cm}^{-1}$ ) 3455, 2924, 2853, 2367, 1701, 1655, 1561, 1460, 1419, 1379, 1259, 1121, 1041;  $^1\text{H}$  NMR ( $\text{C}_6\text{D}_6$ , 750 MHz)  $\delta$  7.57 (d,  $J = 15.5$  Hz, 1H), 6.61 (d,  $J = 11.7$  Hz, 1H), 6.56 (d,  $J = 15.5$  Hz, 1H), 6.42 (dd,  $J = 13.9, 12.3$  Hz, 1H), 6.38 (dd,  $J = 14.3, 12.1$  Hz, 1H), 6.30 (d,  $J = 11.8$  Hz, 1H), 6.26 (dd,  $J = 14.2, 11.5$  Hz, 1H), 6.15 (s, 1H), 6.13 (dd,  $J = 14.2, 11.7$  Hz, 1H), 5.18 (s, 1H), 5.07 (m, 1H), 3.75 (m, 1H), 2.25 (dd,  $J = 14.8, 3.5$  Hz, 1H), 2.20 (ddd,  $J = 14.5, 4.2, 1.0$  Hz, 1H), 2.11 (s, 3H), 1.79 (s, 3H), 1.68 (s, 3H), 1.62 (m, 1H), 1.46 (s, 3H), 1.41 (m, 2H), 1.35 (m, 1H), 1.34 (s, 3H), 1.31 (s, 3H), 1.13 (s, 3H), 1.09 (s, 3H), 1.08 (s, 3H), 1.06 (m, 1H);  $^{13}\text{C}$  NMR ( $\text{C}_6\text{D}_6$ , 188 MHz)  $\delta$  169.3, 168.3, 147.7, 137.3, 136.8, 136.4, 136.3, 135.1, 135.0, 134.9, 130.9, 130.0, 125.4, 122.3, 119.5, 118.2, 90.1, 89.1, 70.5, 67.4, 67.2, 65.6, 64.1, 63.9, 47.3, 41.1, 40.4, 36.2, 35.3, 34.4, 29.5, 29.0, 26.6, 25.3, 22.1, 20.9, 19.9, 17.7, 15.6; ESI-HRMS  $m/z$  calcd for  $\text{C}_{39}\text{H}_{48}\text{O}_7\text{Na}$  ( $\text{M}+\text{Na}$ ) $^+$  651.3298, found 651.3276.

**(trans)-2-[(1'S,2'R,4'S)-4'-Acetoxy-1',2'-Epoxy-2',6',6'-trimethylcyclohexyl]-1-(tributylstannyl)ethylene.** To a solution of acetylene **15** (649 mg, 2.92 mmol), tetrakis(triphenylphosphine)palladium (169 mg, 0.15 mmol) in THF (29 mL) was added dropwise tributyltin hydride (1.55 mL, 5.84 mmol) at  $-78$  °C. After being stirred for 15 min at room temperature and the reaction mixture was filtered through a pad of silica gel to give the crude products as a solution, which was concentrated *in vacuo*. Purification by silica gel column chromatography afforded **20** (1.31 g, 87%):  $[\alpha]_{\text{D}}^{23.0}$  -

49.44 (*c* 0.89, CHCl<sub>3</sub>); IR (neat, cm<sup>-1</sup>) 3466, 2959, 2926, 2872, 2854, 1739, 1462, 1419, 1377, 1365, 1242, 1184, 1155, 1118, 1097, 1070, 1030; <sup>1</sup>H NMR (CDCl<sub>3</sub>, 400 MHz) δ 6.23 (d, *J* = 19.0 Hz, 1H), 6.16 (d, *J* = 19.2 Hz, 1H), 4.92 (m, 1H), 2.38 (dd, *J* = 14.8, 5.7 Hz, 1H), 2.01 (s, 3H), 1.75 (dd, *J* = 14.8, 6.8 Hz, 1H), 1.64 (dd, *J* = 13.2, 3.4 Hz, 1H), 1.49 (m, 6H), 1.35 (m, 1H), 1.30 (m, 6H), 1.19 (s, 3H), 1.16 (s, 3H), 0.97 (s, 3H), 0.88 (m, 15H); <sup>13</sup>C NMR (CDCl<sub>3</sub>, 100 MHz) δ 170.4, 142.1, 132.4, 72.2, 67.9, 64.7, 41.5, 36.8, 34.3, 29.2, 28.6, 27.3, 25.5, 21.5, 20.3, 13.8, 9.6; ESI-HRMS *m/z* calcd for C<sub>25</sub>H<sub>46</sub>O<sub>3</sub>SnNa (M+Na)<sup>+</sup> 537.2371, found 537.2363.

**(trans)-2-[(1S,2R,4S)-4-Acetoxy-1,2-Epoxy-2,6,6-trimethylcyclohexyl]-1-iodoethylene (21).** To a solution of iodine (445 mg, 1.75 mmol), Na<sub>2</sub>CO<sub>3</sub> (372 mg, 3.51 mmol) in dichloromethane (7 mL) was added dropwise a solution of **20** (450 mg, 0.88 mmol) in dichloromethane (2 mL) at 0 °C. After stirred for 5 min at 0 °C, the mixture was poured into a saturated aqueous Na<sub>2</sub>S<sub>2</sub>O<sub>3</sub> solution and then extracted with Chloroform. The organic layers were combined, washed with brine, dried over MgSO<sub>4</sub>, filtered and concentrated *in vacuo*. Purification by silica gel column chromatography afforded iodide **21** (273 mg, 89%): [α]<sub>D</sub><sup>23.0</sup> -68.0 (*c* 1.01, CHCl<sub>3</sub>); IR (neat, cm<sup>-1</sup>) 2965, 2932, 1736, 1603, 1468, 1365, 1242, 1032; <sup>1</sup>H NMR (CDCl<sub>3</sub>, 400 MHz) δ 6.77 (d, *J* = 14.2 Hz, 1H), 6.28 (d, *J* = 14.2 Hz, 1H), 4.89 (m, 1H), 2.37 (dd, *J* = 14.9, 5.5 Hz, 1H), 2.01 (s, 3H), 1.76 (dd, *J* = 15.1, 6.8 Hz, 1H), 1.63 (dd, *J* = 13.5, 3.4 Hz, 1H), 1.35 (dd, *J* = 13.5, 8.9 Hz, 1H), 1.22 (s, 3H), 1.15 (s, 3H), 0.99 (s, 3H); <sup>13</sup>C NMR (CDCl<sub>3</sub>, 100 MHz) δ 170.3, 141.3, 79.8, 72.5, 67.3, 65.1, 41.3, 36.6, 34.3, 28.4, 25.4, 21.5, 20.2; ESI-HRMS *m/z* calcd for C<sub>13</sub>H<sub>19</sub>IO<sub>3</sub>Na (M+Na)<sup>+</sup> 373.0277, found 373.0277.

**Ethyl (2E,4E)-5-(tributylstannyl)hexa-2,4-dienate (22a).** A mixture of **22** (1.0 g, 2.77 mmol) and manganese dioxide (16.6 g) in THF (17 mL) was stirred at room temperature for 6 h. The precipitate was filtered through a pad of Celite, and the filtrate was concentrated *in vacuo* to afford crude aldehyde, which was used in the next reaction without further purification.

To a solution of triethyl phosphonoacetate (0.72 mL, 3.6 mmol) in THF (13 mL) was added sodium hydride (133 mg, 3.32 mmol) at 0 °C and the mixture was stirred for 10 min. To this mixture was added a solution of the crude aldehyde in THF

(3 mL) at 0 °C. After being stirred for 5 min at room temperature, the reaction mixture was poured into water and then extracted with ethyl acetate. The organic layers were combined, dried over MgSO<sub>4</sub>, filtered and concentrated *in vacuo*. Purification by silica gel column chromatography afforded ethyl ester **22a** (936 mg, 79% for 2 steps): IR (neat, cm<sup>-1</sup>) 2961, 2928, 2870, 2852, 1716, 1620, 1462, 1419, 1367, 1340, 1304, 1265, 1234, 1180, 1132, 1095, 1076, 1043; <sup>1</sup>H NMR (CDCl<sub>3</sub>, 400 MHz) δ 7.67 (dd, *J* = 15.3, 11.2 Hz, 1H), 6.34 (d, *J* = 11.3 Hz, 1H), 5.79 (d, *J* = 15.1 Hz, 1H), 4.21 (q, *J* = 7.1 Hz, 2H), 2.13 (s, 3H); <sup>13</sup>C NMR (CDCl<sub>3</sub>, 100 MHz) δ 167.8, 157.9, 137.6, 136.5, 119.9, 60.1, 29.0, 27.3, 20.6, 14.3, 13.6, 9.2; ESI-HRMS *m/z* calcd for C<sub>20</sub>H<sub>38</sub>O<sub>2</sub>SnNa (M+Na)<sup>+</sup> 453.1795, found 453.1777.

**(2E,4E)-5-(Tributylstannyl)hexa-2,4-dien-1-ol (23)**. To a suspension of lithium aluminum hydride (36 mg, 0.95 mmol) in THF (6 mL) was added dropwise a solution of **22a** (338 mg, 0.79 mmol) in THF (2 mL) at 0 °C. After being stirred for 10 min at the same temperature, Rochelle salt was carefully added. The reaction mixture was stirred for 30 min at room temperature and then extracted with ethyl acetate. The organic layers were combined, dried over MgSO<sub>4</sub>, filtered and concentrated *in vacuo*. Purification by silica gel column chromatography afforded **23** (223 mg, 73%): IR (neat, cm<sup>-1</sup>) 3327, 2957, 2920, 2852, 1460, 1417, 1375, 1340, 1292, 1089, 1005; <sup>1</sup>H NMR (CDCl<sub>3</sub>, 400 MHz) δ 6.64 (dd, *J* = 15.1, 10.5 Hz, 1H), 6.19 (d, *J* = 10.5 Hz, 1H), 5.78 (dt, *J* = 14.8, 5.9 Hz, 1H), 4.22 (t, *J* = 5.8 Hz, 2H), 2.00 (s, 3H), 1.49 (m, 6H), 1.30 (m, 6H), 0.89 (m, 15H); <sup>13</sup>C NMR (CDCl<sub>3</sub>, 100 MHz) δ 145.2, 138.0, 130.9, 126.3, 63.7, 29.2, 27.5, 19.9, 13.8, 9.2.

**(2E,4E,6E)-7-[(1'S,2'R,4'S)-4'-Acetoxy-1',2'-Epoxy-2',6',6'-trimethylcyclohexa-1'-yl]-5-methylhepta-2,4,6-triene-1-ol (24)**. To a solution of iodide **21** (560 mg, 1.6 mmol) and (2E,4E)-5-(tributyl stannyl)hexa-2,4-dien-1-ol **23** (915 mg, 2.40 mmol) in DMF (8 mL) was added bis(acetonitrile)dichloropalladium(II) (21 mg, 0.05 mmol) and lithium chloride (136 mg, 3.20 mmol). After being stirred for 10 min at 55 °C, the reaction mixture was poured into water and then extracted with ethyl acetate. The organic layers were combined, washed with brine, dried over MgSO<sub>4</sub>, filtered and concentrated *in vacuo*. Purification by silica gel column chromatography afforded coupling product **24** (482 mg, 94%) as a yellow oil: [ $\alpha$ ]<sub>D</sub><sup>23.0</sup> -41.6 (*c* 1.02, CHCl<sub>3</sub>); IR

(neat,  $\text{cm}^{-1}$ ) 3443, 2964, 2928, 1736, 1450, 1365, 1244, 1030;  $^1\text{H}$  NMR ( $\text{CDCl}_3$ , 400 MHz)  $\delta$  6.60 (dd,  $J = 14.2, 10.3$  Hz, 1H), 6.27 (d,  $J = 15.8$  Hz, 1H), 6.10 (d,  $J = 11.2$  Hz, 1H), 5.88 (d,  $J = 15.8$  Hz, 1H), 5.86 (m, 1H), 4.93 (m, 1H), 4.24 (m, 2H), 2.40 (dd,  $J = 15.1, 5.8$  Hz, 1H), 2.01 (s, 3H), 1.88 (s, 3H), 1.77 (dd,  $J = 14.8, 6.8$  Hz, 1H), 1.66 (dd,  $J = 13.2, 3.4$  Hz, 1H), 1.34 (m, 1H), 1.18 (s, 3H), 1.15 (s, 3H), 0.96 (s, 3H);  $^{13}\text{C}$  NMR ( $\text{CDCl}_3$ , 100 MHz)  $\delta$  170.3, 137.4, 134.5, 132.8, 130.4, 127.5, 123.7, 70.3, 67.7, 65.5, 63.5, 41.4, 36.8, 34.7, 28.6, 25.5, 21.4, 20.2, 12.8; ESI-HRMS  $m/z$  calcd for  $\text{C}_{19}\text{H}_{28}\text{O}_4\text{Na}$  ( $\text{M}+\text{Na}$ ) $^+$  343.1885, found 343.1883.

**2-[[[(2'E,4'E,6'E)-7'-((1'S,2'R,4'S)-4''-Acetoxy-1'',2''-Epoxy-2'',6'',6''-trimethylcyclohexylidene-1''-yl)-5'-methylhepta-2,4,6-triene)sulfanyl]benzothiazole (25).** To a solution of **24** (330 mg, 1.03 mmol), 2-mercaptobenzothiazole (241 mg, 1.44 mmol) and triphenylphosphine (378 mg, 1.44 mmol) in THF (10 mL) was added dropwise diisopropyl azodicarboxylate (0.32 mL, 1.65 mmol) at 0 °C. The reaction mixture was stirred for 10 min at room temperature and the all solvents were removed *in vacuo*. To a residue was added diethyl ether and the precipitate was removed by filtration through a pad of Celite to give the crude products as a solution, which was concentrated *in vacuo*. Purification by short silica gel column chromatography afforded the thioether **25** (444 mg, 92%):  $[\alpha]^{23.0}_{\text{D}} -25.6$  ( $c$  1.08,  $\text{CHCl}_3$ ); IR (neat,  $\text{cm}^{-1}$ ) 2964, 2926, 1734, 1460, 1427, 1365, 1242, 1028;  $^1\text{H}$  NMR ( $\text{CDCl}_3$ , 400 MHz)  $\delta$  7.87 (m, 1H), 7.75 (m, 1H), 7.40 (m, 1H), 7.28 (m, 1H), 6.71 (dd,  $J = 14.7, 11.3$  Hz, 1H), 6.24 (d,  $J = 15.5$  Hz, 1H), 6.07 (d,  $J = 11.4$  Hz, 1H), 5.88 (d,  $J = 15.5$  Hz, 1H), 5.86 (m, 1H), 4.93 (m, 1H), 4.11 (d,  $J = 7.5$  Hz, 2H), 2.38 (dd,  $J = 15.8, 5.7$  Hz, 1H), 2.01 (s, 3H), 1.87 (s, 3H), 1.76 (dd,  $J = 14.8, 6.8$  Hz, 1H), 1.65 (dd,  $J = 13.2, 3.4$  Hz, 1H), 1.33 (m, 1H), 1.16 (s, 3H), 1.14 (s, 3H), 0.96 (s, 3H);  $^{13}\text{C}$  NMR ( $\text{CDCl}_3$ , 100 MHz)  $\delta$  170.3, 166.1, 153.2, 137.2, 135.3, 134.9, 130.9, 129.9, 127.4, 125.9, 124.2, 124.1, 121.5, 120.9, 70.3, 67.6, 65.5, 41.4, 36.7, 36.1, 34.7, 28.5, 25.5, 21.4, 20.2, 12.8; ESI-HRMS  $m/z$  calcd for  $\text{C}_{26}\text{H}_{31}\text{NO}_3\text{S}_2\text{Na}$  ( $\text{M}+\text{Na}$ ) $^+$  492.1643, found 492.1640.

**2-[[[(2'E,4'E,6'E)-7'-((1'S,2'R,4'S)-4''-Acetoxy-1'',2''-Epoxy-2'',6'',6''-trimethylcyclohexylidene-1''-yl)-5'-methylhepta-2,4,6-triene)sulfonyl]benzothiazole (7).** To a solution of the thioether **25** (30 mg, 0.064 mmol) in ethanol (0.64 mL) was added dropwise a solution of sodium tungstate (VI) dihydrate (42 mg,

0.128 mmol) in hydrogen peroxide (30 wt.% in water, 0.51 mL) at 0 °C. After being stirred for 50 min at room temperature, the reaction mixture was poured into water and then extracted with diethyl ether. The organic layers were combined, dried over MgSO<sub>4</sub>, filtered and concentrated *in vacuo*. Purification by short silica gel column chromatography afforded the sulfone **7** (18 mg, 56%) as a yellow solid:  $[\alpha]_D^{24.0} -22.5$  (c 0.79, CHCl<sub>3</sub>); IR (neat, cm<sup>-1</sup>) 3471, 2930, 2865, 1736, 1637, 1473, 1381, 1334, 1240, 1147, 1116, 976, 763; <sup>1</sup>H NMR (CDCl<sub>3</sub>, 400 MHz) δ 8.22 (d, *J* = 7.8 Hz, 1H), 8.01 (d, *J* = 8.7 Hz, 1H), 7.65 (m, 2H), 6.59 (dd, *J* = 14.7, 11.0 Hz, 1H), 6.20 (d, *J* = 15.6 Hz, 1H), 6.02 (d, *J* = 15.6 Hz, 1H), 5.90 (d, *J* = 15.6 Hz, 1H), 5.64 (dt, *J* = 15.1, 7.8 Hz, 1H), 4.91 (m, 1H), 4.31 (d, *J* = 7.8 Hz, 1H), 2.36 (dd, *J* = 15.1, 5.7 Hz, 1H), 2.00 (s, 3H), 1.78 (dd, *J* = 15.2, 6.5 Hz, 1H), 1.71 (s, 3H), 1.63 (m, 1H), 1.37 (dd, *J* = 13.7, 8.5 Hz, 1H), 1.13 (s, 3H), 1.12 (s, 3H), 0.95 (s, 3H); <sup>13</sup>C NMR (CDCl<sub>3</sub>, 100 MHz) δ 170.7, 165.9, 153.0, 137.5, 137.2, 129.5, 128.3, 128.0, 125.8, 125.7, 122.7, 116.5, 70.5, 67.9, 65.9, 59.3, 41.7, 37.1, 35.0, 28.9, 25.8, 21.7, 20.5, 13.1; ESI-HRMS *m/z* calcd for <sub>26</sub>H<sub>31</sub>NO<sub>5</sub>S<sub>2</sub>Na (M+Na)<sup>+</sup> 524.1541, found 524.1524.

**Peridinin Derivative C (3).** To a solution of olefin segment **7** (22 mg, 0.044 mmol) and ylidenebutenolide segment **5** (15 mg, 0.044 mmol) in THF (0.65 mL) was added dropwise sodium bis(trimethylsilyl)amide (1.0M in THF, 0.13 mL, 0.13 mmol) at -78 °C in the dark. After being stirred for 5 min at the same temperature, the reaction mixture was poured into water and then extracted with diethyl ether. The organic layers were combined, washed with brine, dried over MgSO<sub>4</sub>, filtered and concentrated *in vacuo*. Purification by short silica gel column chromatography (from 30% to 50% ethyl acetate in hexane) in the dark afforded peridinin derivative **2** (11 mg, 40%) as a mixture of the isomers as a red film. A solution of a mixture of all-*trans*-peridinin derivative **2** and its *cis*-isomer in benzene was left at room temperature in the fluorescence light. After 2 days, partial separation by preparative HPLC [column: Develosil CN-UG (0.6 x 25 cm); mobile phase: acetone / *n*-hexane = 1 / 10; flow rate: 2.0 mL / min.; UVdetect: 450 nm; retention time: (all-*trans*-isomer) 49 min., (15-*cis*-isomer) 43 min.] in the dark, and HPLC [column: YMC Carotenoid C30 (10 x 250 mm); reverse phase: acetonitrile / methanol / water = 87 / 10 / 3; flow rate: 2.0 mL / min.; UVdetect: 450 nm; retention time: (all-*trans*-isomer) 30 min., (15-*cis*-isomer) 24 min.] in the dark, afforded the desired optically active peridinin derivative **2** as a red film: IR (neat, cm<sup>-1</sup>) 3327, 2924,



1741, 1712, 1462, 1377, 1259, 1153, 1028;  $^1\text{H}$  NMR ( $\text{C}_6\text{D}_6$ , 750 MHz)  $\delta$  7.57 (d,  $J$  = 15.5 Hz, 1H), 6.68 (d,  $J$  = 15.4 Hz, 1H), 6.62 (dd,  $J$  = 14.0, 12.3 Hz, 1H), 6.56 (d,  $J$  = 15.5 Hz, 1H), 6.45 (dd,  $J$  = 14.1, 11.9 Hz, 1H), 6.38 (dd,  $J$  = 14.3, 11.2 Hz, 1H), 6.33 (d,  $J$  = 11.7 Hz, 1H), 6.26 (dd,  $J$  = 14.2, 11.3 Hz, 1H), 6.17 (d,  $J$  = 11.7 Hz, 1H), 6.15 (s, 1H), 5.92 (d,  $J$  = 15.5 Hz, 1H), 5.20 (s, 1H), 5.19 (m, 1H), 3.86 (m, 1H), 2.35 (dd,  $J$  = 14.7, 5.3 Hz, 1H), 2.19 (ddd,  $J$  = 14.7, 5.1, 1.1 Hz, 1H), 2.13 (s, 3H), 1.79 (s, 3H), 1.72 (s, 3H), 1.71 (m, 1H), 1.62 (dd,  $J$  = 14.8, 7.2 Hz, 1H), 1.42 (m, 2H), 1.35 (m, 1H), 1.13 (s, 3H), 1.12 (s, 3H), 1.09 (s, 3H), 1.09 (s, 3H), 1.08 (s, 3H), 1.05 (s, 3H), 1.05 (m, 1H);  $^{13}\text{C}$  NMR ( $\text{C}_6\text{D}_6$ , 188 MHz)  $\delta$  169.3, 168.3, 147.5, 138.1, 137.7, 137.1, 136.4, 135.8, 134.7, 134.6, 134.4, 132.5, 131.4, 129.9, 125.1, 125.0, 122.4, 118.5, 70.5, 70.3, 67.7, 67.5, 65.8, 63.9, 47.3, 42.2, 41.2, 37.3, 35.3, 35.1, 29.5, 28.8, 25.7, 25.3, 21.0, 19.9, 15.6, 12.9; ESI-HRMS  $m/z$  calcd for  $\text{C}_{39}\text{H}_{48}\text{O}_7\text{Na}$  ( $\text{M}+\text{Na}$ ) $^+$  651.3298, found 651.3276.

**(4S)-4-hydroxy-2,6,6-trimethylcyclohex-1-enyltrifluoromethanesulfonate (10a).**

To a solution of **10** (200 mg, 0.50 mmol) in THF (2.47 mL) was added tetra-*n*-butylammonium fluoride (1.0M in THF, 1.49 mL, 1.49 mmol) at room temperature. After being stirred for 45 min at the same temperature, the reaction mixture was poured into a saturated aqueous  $\text{NH}_4\text{Cl}$  solution and then extracted with ethyl acetate. The organic layers were combined, washed with brine, dried over  $\text{MgSO}_4$ , filtered and concentrated *in vacuo*. Purification by silica gel column chromatography (from 10% to 50% ethyl acetate in hexane) afforded alcohol **10a** (112 mg, 78%) as a colorless oil:  $[\alpha]_{\text{D}}^{23.0}$  -25.4 (c 0.99,  $\text{CHCl}_3$ ); IR (neat,  $\text{cm}^{-1}$ ) 3359, 2932, 2361, 1686, 1404, 1210, 1067, 913;  $^1\text{H}$  NMR ( $\text{CDCl}_3$ , 400 MHz)  $\delta$  4.11 (m, 1H), 2.50 (ddd,  $J$  = 17.0, 5.5, 1.9 Hz, 1H), 2.18 (ddd,  $J$  = 16.5, 9.2, 0.9 Hz, 1H), 1.86 (ddd,  $J$  = 12.4, 3.7, 0.3 Hz, 1H), 1.77 (s, 3H), 1.68 (dd,  $J$  = 11.9, 11.9 Hz, 1H), 1.22 (s, 3H), 1.17 (s, 3H);  $^{13}\text{C}$  NMR ( $\text{CDCl}_3$ , 100 MHz)  $\delta$  149.3, 123.9, 64.1, 49.0, 41.3, 37.1, 27.7, 27.0, 17.9; FAB-HRMS  $m/z$  calcd for  $\text{C}_{39}\text{H}_{51}\text{O}_7\text{Na}$  ( $\text{M}+\text{H}$ ) $^+$  288.0716, found 289.0759.

**(trans)-2-[(4S)-4-hydroxy-2,6,6-trimethylcyclohexene]-1-**

**(tributylstannyl)ethylene (27).** To a solution of alcohol **10a** (388 mg, 1.17 mmol) and bisstannane **26** (855 mg, 1.41 mmol) in DMF (5.86 mL) was added diisopropylethylamine (0.61 mL, 3.52 mmol), tetrakis(triphenylphosphine)palladium (67 mg, 0.059 mmol), and lithium chloride (99 mg, 2.34 mmol) After being stirred for 1

h at 90 °C, the reaction mixture was poured into water and then extracted with ethyl acetate. The organic layers were combined, washed with brine, dried over MgSO<sub>4</sub>, filtered and concentrated *in vacuo*. Purification by silica gel column chromatography (from 0% to 30% ethyl acetate 3% triethylamine in hexane) afforded **27** (451 mg, 85%) as a colorless oil:  $[\alpha]_D^{23.0}$  -72.0 (c 0.84, CHCl<sub>3</sub>); IR (neat, cm<sup>-1</sup>) 3360, 2924, 2855, 2361, 1579, 1464, 1174, 1045, 691; <sup>1</sup>H NMR (CDCl<sub>3</sub>, 400 MHz) δ 6.30 (d, *J* = 19.6 Hz, 1H), 5.90 (d, *J* = 19.2 Hz, 1H), 3.98 (m, 1H), 2.35 (dd, *J* = 16.5, 5.5 Hz, 1H), 2.00 (dd, *J* = 16.1, 9.5 Hz, 1H), 1.75 (ddd, *J* = 19.0, 3.6, 2.3 Hz, 1H), 1.70 (s, 3H), 16.0-1.47 (m, 6H), 1.45 (dd, *J* = 12.3 Hz, 1H), 1.06 (s, 3H), 1.04 (s, 3H), 0.90 (m, 15H); <sup>13</sup>C NMR (CDCl<sub>3</sub>, 100 MHz) δ 145.4, 141.5, 133.9, 124.9, 65.5, 48.6, 42.5, 36.9, 30.4, 29.6, 28.8, 27.6, 21.7, 14.1, 9.9.

**(trans)-2-[(4S)-4-hydroxy-2,6,6-trimethylcyclohexene]-1-iodoethylene (28).** To a solution of iodide (728 mg, 2.87 mmol), Na<sub>2</sub>CO<sub>3</sub> (608 mg, 5.74 mmol) in dichloromethane (11.4 mL) was added dropwise a solution of stannane **27** (654 mg, 1.44 mmol) in dichloromethane (3 mL) at 0 °C. After stirred for 5 min at 0 °C, the mixture was poured into a saturated aqueous Na<sub>2</sub>S<sub>2</sub>O<sub>3</sub> solution and then extracted with ethyl acetate. The organic layers were combined, washed with brine, dried over MgSO<sub>4</sub>, filtered and concentrated *in vacuo*. Purification by silica gel column chromatography (from 5% to 30% ethyl acetate in hexane) afforded iodide **28** (379 mg, 94%) as a colorless oil:  $[\alpha]_D^{23.0}$  -115.0 (c 0.64, CHCl<sub>3</sub>); IR (neat, cm<sup>-1</sup>) 3301, 2955, 1590, 1466, 1364, 1166, 1047, 945, 781; <sup>1</sup>H NMR (CDCl<sub>3</sub>, 400 MHz) δ 6.89 (d, *J* = 14.6 Hz, 1H), 5.96 (d, *J* = 14.6 Hz, 1H), 3.95 (m, 1H), 2.33 (dd, *J* = 17.0, 5.5 Hz, 1H), 1.94 (ddd, *J* = 17.0, 9.6, 1.4 Hz, 1H), 1.73 (ddd, *J* = 12.4, 3.7, 1.4 Hz, 1H), 1.66 (s, 3H), 1.42 (dd, *J* = 11.9, 11.9 Hz, 1H), 1.02 (s, 6H); <sup>13</sup>C NMR (CDCl<sub>3</sub>, 100 MHz) δ 143.5, 139.0, 128.2, 79.5, 65.1, 48.2, 42.4, 36.8, 30.2, 28.7, 21.7; FAB-HRMS *m/z* calcd for C<sub>11</sub>H<sub>17</sub>IO<sub>7</sub> (M+H)<sup>+</sup> 293.0397, found 293.0423.

**(trans)-2-[(4S)-4-Acetoxy-2,6,6-trimethylcyclohexene]-1-iodoethylene (29).** To a solution of iodide **28** (379 mg, 1.30 mmol) in pyridine (5.19 mL) was added acetic anhydride (0.24 mL, 2.59 mmol) at room temperature, and the reaction mixture was stirred for 16 h at the same temperature. A saturated aqueous CuSO<sub>4</sub> solution was added and then the resulting mixture was extracted with ethyl acetate. The organic layers were

combined, washed with brine, dried over  $\text{MgSO}_4$ , filtered and concentrated *in vacuo*. Purification by silica gel column chromatography (30% ethyl acetate in hexane) afforded acetate **29** (374 mg, 86%) as a colorless oil:  $[\alpha]^{25.0}_{\text{D}} -99.8$  (c 1.10,  $\text{CHCl}_3$ ); IR (neat,  $\text{cm}^{-1}$ ) 2963, 2867, 1740, 1588, 1466, 1242, 1117, 1035, 968; NMR ( $\text{CDCl}_3$ , 400 MHz)  $\delta$  6.91 (d,  $J = 14.6$  Hz, 1H), 6.00 (d,  $J = 15.1$  Hz, 1H), 5.02 (m, 1H), 2.39 (dd,  $J = 16.9, 5.4$  Hz, 1H), 2.04 (s, 3H), 2.01 (m, 1H), 1.76 (ddd,  $J = 11.9, 3.2, 1.8$  Hz, 1H), 1.67 (s, 3H), 1.55 (dd,  $J = 11.5, 11.5$  Hz, 1H), 1.07 (s, 3H), 1.04 (s, 3H);  $^{13}\text{C}$  NMR ( $\text{CDCl}_3$ , 100 MHz)  $\delta$  171.1, 143.3, 139.2, 127.8, 79.8, 68.3, 43.9, 38.4, 36.4, 30.0, 28.5, 21.8, 21.6; FAB-HRMS  $m/z$  calcd for  $\text{C}_{39}\text{H}_{51}\text{O}_7$  ( $\text{M}+\text{H}$ ) $^+$  335.0502, found 335.0541.

**(2E,4E,6E)-7-[(4'S)-4'-Acetoxy-2',6',6'-trimethylcyclohexene]-5-methylhepta-2,4,6-triene-1-ol (30).** To a solution of acetate **29** (194 mg, 0.58 mmol) and (2E,4E)-5-(tributylstannyl)hexa-2,4-dien-1-ol **23** (247 mg, 0.64 mmol) in DMF (2.9 mL) was added diisopropylethylamine (0.30 mL, 1.74 mmol), bis(acetonitrile)dichloropalladium(II) (7 mg, 0.03 mmol) and lithium chloride (49 mg, 1.16 mmol). After being stirred for 50 min at room temperature, the reaction mixture was poured into water and then extracted with ethyl acetate. The organic layers were combined, washed with brine, dried over  $\text{MgSO}_4$ , filtered and concentrated *in vacuo*. Purification by silica gel column chromatography (from 10% to 30% ethyl acetate in hexane) afforded **30** (151 mg, 85%) as a yellow oil:  $[\alpha]^{23.0}_{\text{D}} -91.0$  (c 1.33,  $\text{CHCl}_3$ ); IR (neat,  $\text{cm}^{-1}$ ) 3414, 2961, 2924, 1736, 1366, 1244, 1030;  $^1\text{H}$  NMR ( $\text{CDCl}_3$ , 400 MHz)  $\delta$  6.63 (dd,  $J = 15.1, 11.2$  Hz, 1H), 6.13-5.96 (m, 3H), 5.88 (td,  $J = 12.1, 5.9$  Hz, 1H), 5.06 (m, 1H), 4.24 (m, 1H), 2.44 (dd,  $J = 17.0, 5.72$  Hz, 1H), 2.06 (m, 1H), 2.05 (s, 3H), 1.92 (s, 3H), 1.77 (ddd,  $J = 12.2, 3.4, 1.8$  Hz, 1H), 1.71 (s, 3H), 1.56 (m, 1H), 1.10 (s, 3H), 1.06 (s, 3H);  $^{13}\text{C}$  NMR ( $\text{CDCl}_3$ , 100 MHz)  $\delta$  170.8, 138.3, 137.7, 135.9, 132.0, 129.3, 127.9, 125.8, 125.6, 68.4, 63.7, 43.9, 38.4, 36.6, 29.9, 28.4, 21.5, 21.4, 12.6; ESI-HRMS  $m/z$  calcd for  $\text{C}_{19}\text{H}_{28}\text{O}_3\text{Na}$  ( $\text{M}+\text{Na}$ ) $^+$  327.1936, found 327.1940.

**2-[[[(2'E,4'E,6'E)-7'-((4'S)-4''-Acetoxy-1'',2''-Epoxy-2'',6'',6''-trimethylcyclohexene)-5'-methylhepta-2,4,6-triene)sulfanyl] benzothiazole (30a).** To a solution of alcohol **30** (110 mg, 0.29 mmol), 2-mercaptobenzothiazole (68 mg, 0.41 mmol) and triphenylphosphine (107 mg, 0.41 mmol) in THF (3 mL) was added dropwise diisopropyl azodicarboxylate (0.09 mL, 0.47 mmol) at 0 °C. The reaction

mixture was stirred for 10 min at room temperature and the all solvents were removed *in vacuo*. To a residue was added diethyl ether and the precipitate was removed by filtration through a pad of Celite to give the crude products as a solution, which was concentrated *in vacuo*. Purification by short silica gel column chromatography (from 10% to 30% ethyl acetate in hexane) afforded thioether **30a** (111 mg, 84%):  $[\alpha]_D^{23.0} -64.1$  (c 0.93, CHCl<sub>3</sub>); IR (neat, cm<sup>-1</sup>) 2963, 2926, 1734, 1460, 1427, 1363, 1244, 1030; <sup>1</sup>H NMR (CDCl<sub>3</sub>, 400 MHz)  $\delta$  7.87 (m, 1H), 7.75 (m, 1H), 7.41 (m, 1H), 7.27 (m, 1H), 6.74 (dd, *J* = 14.6, 11.2 Hz, 1H), 6.09-6.04 (m, 2H), 6.02 (d, *J* = 10.0 Hz, 1H), 5.88 (m, 1H), 5.04 (m, 1H), 4.11 (d, *J* = 7.6 Hz, 2H), 2.43 (dd, *J* = 17.0, 5.5 Hz, 1H), 2.08 (dd, *J* = 17.0, 9.4 Hz, 1H), 2.04 (s, 3H), 1.91 (s, 3H), 1.73 (m, 1H), 1.69 (s, 3H), 1.56 (m, 1H), 1.08 (s, 3H), 1.05 (s, 3H); <sup>13</sup>C NMR (CDCl<sub>3</sub>, 100 MHz)  $\delta$  170.7, 166.2, 153.2, 138.2, 137.6, 136.3, 135.3, 131.2, 128.9, 126.7, 126.1, 125.9, 125.6, 124.2, 121.5, 120.9, 68.2, 43.9, 38.3, 36.6, 36.2, 29.9, 28.4, 21.4, 21.4, 12.56; ESI-HRMS *m/z* calcd for C<sub>26</sub>H<sub>31</sub>NO<sub>2</sub>S<sub>2</sub>Na (M+Na)<sup>+</sup> 476.1694, found 476.1696.

**2-((((2'E,4'E,6'E)-7'-((4'S)-4''-Acetoxy-2'',6'',6''-trimethylcyclohexene)-5'-methylhepta-2,4,6-triene)sulfonyl) benzothiazole (8).** To a solution of the thioether **30a** (205 mg, 0.45 mmol) in ethanol (9.0 mL) was added dropwise a solution of sodium tungstate (VI) dihydrate (164 mg, 0.50 mmol) in hydrogen peroxide (30 wt.% in water, 5.42 mL) at 0 °C. After being stirred for 50 min at room temperature, the reaction mixture was poured into water and then extracted with diethyl ether. The organic layers were combined, dried over MgSO<sub>4</sub>, filtered and concentrated *in vacuo*. Purification by short silica gel column chromatography (from 10% to 30% ethyl acetate in hexane) afforded the sulfone **8** (68 mg, 31%):  $[\alpha]_D^{23.0} -43.5$  (c 1.50, CHCl<sub>3</sub>); IR (neat, cm<sup>-1</sup>) 2963, 1728, 1630, 1471, 1364, 1330, 1244, 1148, 1026, 970; <sup>1</sup>H NMR (CDCl<sub>3</sub>, 400 MHz)  $\delta$  8.24 (m, 1H), 7.99 (m, 1H), 7.63 (m, 2H), 6.60 (dd, *J* = 14.9, 11.3 Hz, 1H), 6.10 (d, *J* = 16.2 Hz, 1H), 5.99 (d, *J* = 16.3 Hz, 1H), 5.98 (d, *J* = 11.4 Hz, 1H), 5.62 (m, 1H), 5.04 (m, 1H), 4.33 (d, *J* = 7.4 Hz, 2H), 2.37 (m, 1H), 2.09 (m, 1H), 2.04 (s, 3H), 1.80-1.65 (m, 1H), 1.74 (s, 3H), 1.60-1.50 (m, 1H), 1.43 (s, 3H), 0.97 (s, 3H), 0.88 (s, 3H); <sup>13</sup>C NMR (CDCl<sub>3</sub>, 100 MHz)  $\delta$  171.5, 166.3, 153.3, 139.2, 138.5, 137.8, 137.6, 133.9, 129.5, 128.6, 128.3, 128.2, 127.6, 126.1, 123.0, 116.1, 69.2, 59.8, 44.7, 38.7, 37.8, 29.5, 28.9, 22.12, 20.8, 13.2; ESI-HRMS *m/z* calcd for C<sub>26</sub>H<sub>31</sub>NO<sub>4</sub>S<sub>2</sub>Na (M+Na)<sup>+</sup> 508.1592, found 508.1547.

**Peridinin derivative D (4).** To a solution of sulfone **8** (22 mg, 0.045 mmol) and aldehyde **5** (16 mg, 0.045 mmol) in THF (0.68 mL) was added dropwise sodium bis(trimethylsilyl)amide (1.0M in THF, 0.14 mL, 0.14 mmol) at -78 °C in the dark. After being stirred for 5 min at the same temperature, the reaction mixture was poured into water and then extracted with diethyl ether. The organic layers were combined, washed with brine, dried over MgSO<sub>4</sub>, filtered and concentrated *in vacuo*. Purification by short silica gel column chromatography (from 30% to 50% ethyl acetate in hexane) in the dark afforded peridinin derivative (13 mg, 47%) as a mixture of the isomers as a red film. A solution of a mixture of all-*trans*-peridinin derivative **4** and its isomer in benzene was left at room temperature in the fluorescence light. After 4 days, partial separation by preparative HPLC [column: Develosil CN-UG (0.6 x 25 cm); mobile phase: acetone / *n*-hexane = 1 / 10; flow rate: 2 mL / min.; UVdetect: 459 nm; retention time: (all-*trans*-isomer) 68 min., (15-*cis*-isomer) 61 min.] in the dark, and HPLC [column: YMC Carotenoid C30 (10 x 250 mm); reverse phase: acetonitrile / methanol / water = 87 / 10 / 3; flow rate: 2.0 mL / min.; UVdetect: 459 nm; retention time: (all-*trans*-isomer) 34 min.] in the dark, afforded the desired optically active peridinin derivative **4** as a red film: IR (neat, cm<sup>-1</sup>) 3449, 2924, 2853, 2363, 1751, 1655, 1509, 1364, 1242, 1124, 1034; <sup>1</sup>H NMR (C<sub>6</sub>D<sub>6</sub>, 750 MHz) δ 7.57 (d, *J* = 15.5 Hz, 1H), 6.68 (dd, *J* = 13.7, 12.3 Hz, 1H), 6.57 (d, *J* = 15.5 Hz, 1H), 6.49 (dd, *J* = 14.1, 12.0 Hz, 1H), 6.42 (dd, *J* = 14.1, 12.0 Hz, 1H), 6.36 (d, *J* = 11.4 Hz, 1H), 6.34 (dd, *J* = 14.1, 11.0 Hz, 1H), 6.27 (d, *J* = 15.8 Hz, 1H), 6.26 (d, *J* = 11.4 Hz, 1H), 6.19 (d, *J* = 16.1 Hz, 1H), 6.17 (s, 1H), 5.29 (m, 1H), 5.22 (s, 1H), 3.76 (m, 1H), 2.46 (dd, *J* = 17.1, 5.9 Hz, 1H), 2.20 (ddd, *J* = 14.2, 4.8, 1.0 Hz, 1H), 2.15 (s, 3H), 2.13 (m, 1H), 1.87 (m, 1H), 1.84 (s, 3H), 1.68 (s, 3H), 1.64 (dd, *J* = 11.9, 11.9 Hz, 1H), 1.42 (m, 2H), 1.13 (s, 3H), 1.13 (s, 3H), 1.09 (s, 3H), 1.08 (s, 3H), 1.07 (s, 3H), 1.06 (m, 1.16); <sup>13</sup>C NMR (C<sub>6</sub>D<sub>6</sub>, 188 MHz) δ 169.8, 168.3, 147.4, 139.0, 138.1, 137.7, 137.2, 136.3, 134.6, 134.3, 134.1, 131.6, 129.6, 126.7, 126.4, 125.1, 122.4, 118.5, 70.4, 68.1, 67.4, 63.8, 47.3, 44.4, 41.2, 38.8, 36.8, 35.3, 30.1, 29.5, 28.6, 25.3, 21.5, 21.0, 19.9, 15.6, 12.7; ESI-HRMS *m/z* calcd for C<sub>39</sub>H<sub>50</sub>O<sub>6</sub>Na (M+Na)<sup>+</sup> 637.3505, found 637.3517.

```

Filename = bl-acetyl-acetylene-1
Author = delta
Experiment = 1
Sample_id = 1
Solvent = CHLOROFORM-D
Creation_time = 27-JUL-2006 19:48:01
Revision_time = 29-OCT-2008 17:43:11
Current_time = 29-OCT-2008 17:43:44

Comment = single pulse
Data_format = 1D COMPLEX
Dim_size = 26214
Dim_title =
Dim_units =
Dimensions =
Site =
Spectrometer = DELTA2_NMR
Field_strength = 9.389766 [T] (400 [MHz])
X_acquisition = 4.36731904 [s]
X_domain = 1H
X_freq = 399.78219838 [MHz]
X_offset = 4 [ppm]
X_points = 32768
X_resolution = 0.22887343 [Hz]
X_sweep = 7.5030012 [kHz]
IRF_domain = 1H
IRF_freq = 399.78219838 [MHz]
IRF_offset = 1 [ppm]
IRF_resolution = 0.22887343 [Hz]
IRF_sweep = 7.5030012 [kHz]
T1_freq = 399.78219838 [MHz]
T1_offset = 5 [ppm]
Clipped = FALSE
Mod_return = 1
Scans = 8
Total_scans = 8
X_acq_time = 12 [us]
X_angle = 45 [deg]
X_pulse = 6 [us]
IRF_mode = Off
Dante_preset = FALSE
Relax_wait = 3 [s]
Relaxation_delay = 5 [s]
Repetition_time = 9.36731904 [s]
Temp_get = 24.8 [dc]
    
```

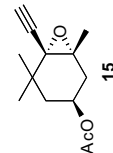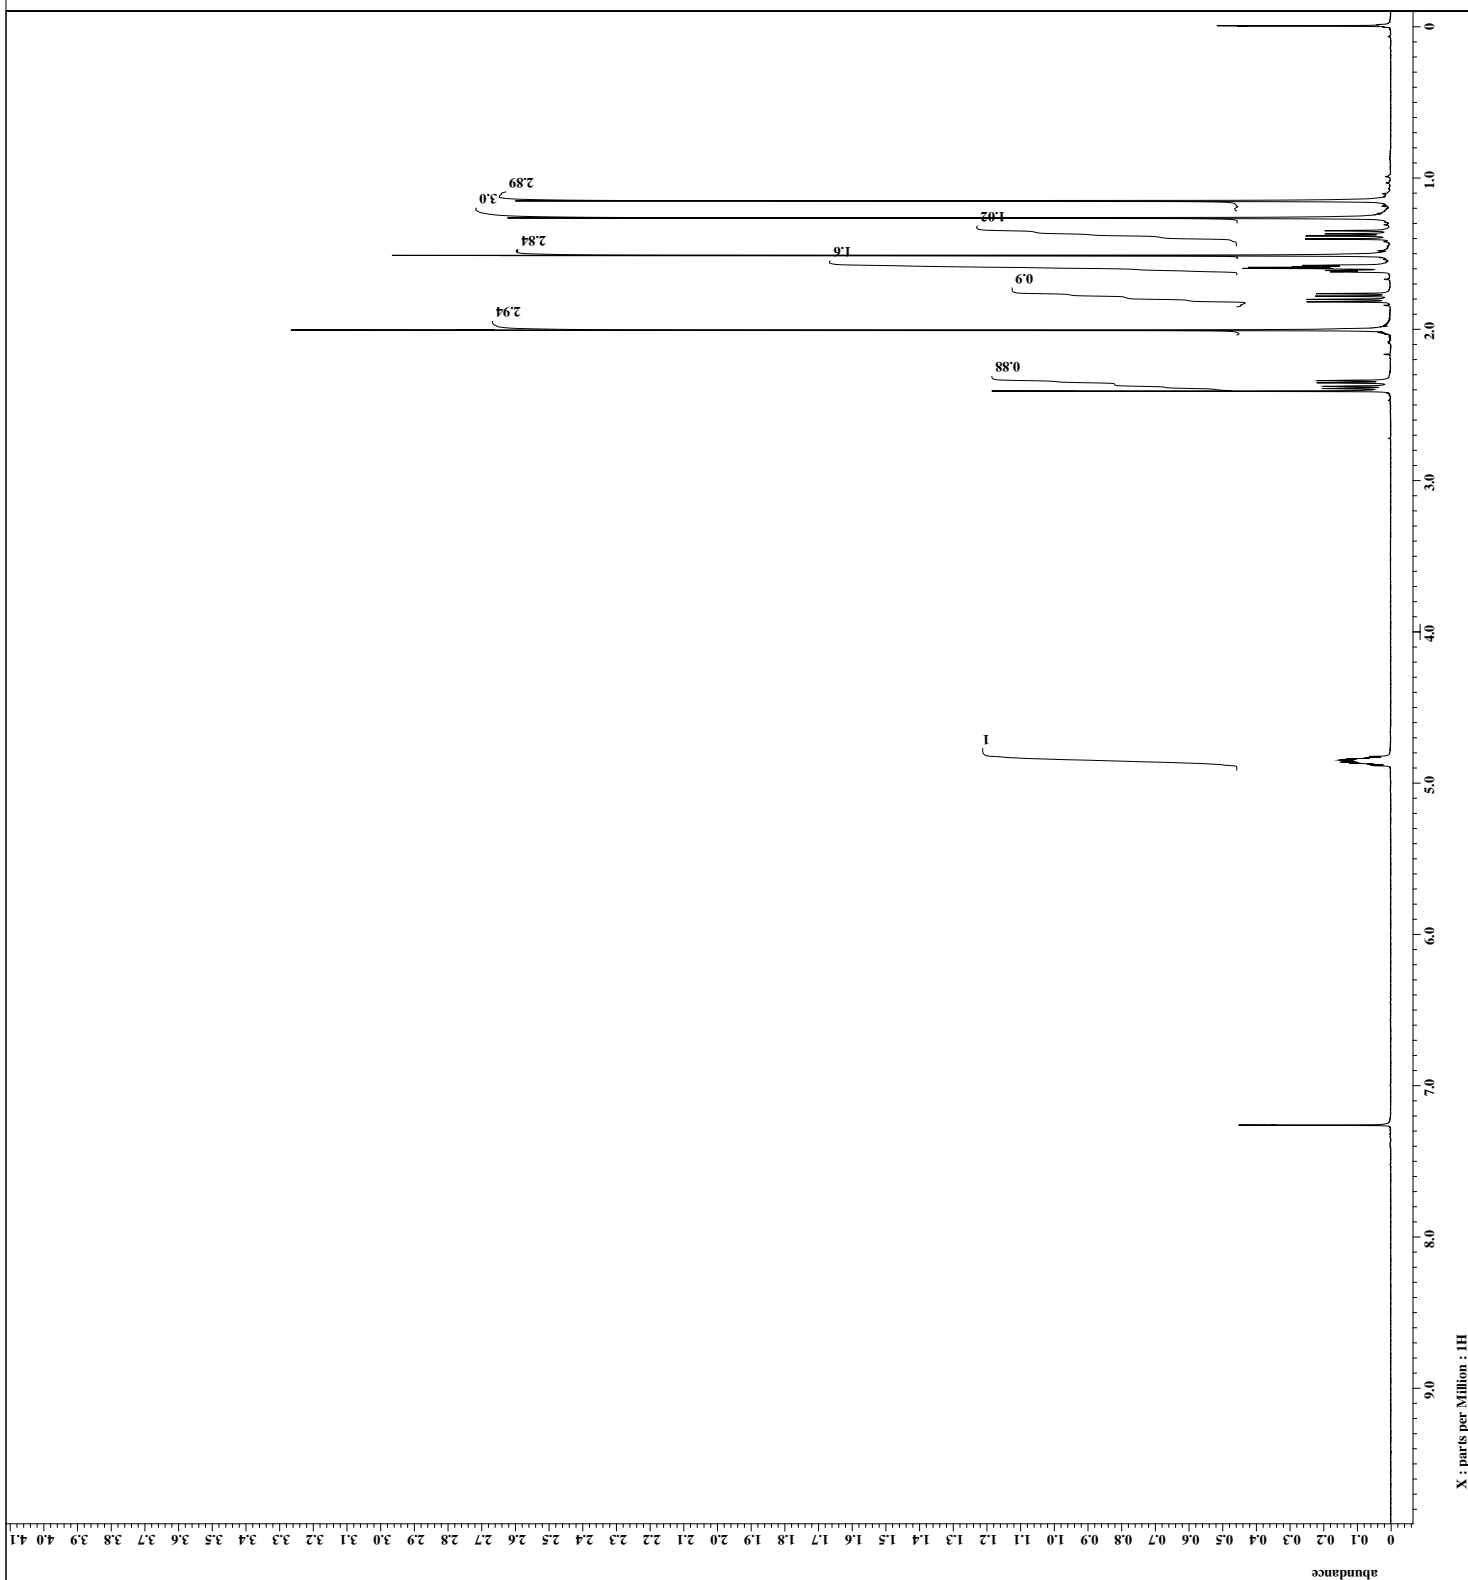

```

Filename = bl-acetyl-acetylene-1
Author = delta
Experiment = 1
Angle_pulse_dec = 1
Sample_id = CHLOROFORM-D
Solvent = CHLOROFORM-D
Creation_time = 27-JUL-2006 21:32:48
Revision_time = 29-OCT-2008 16:29:12
Current_time = 29-OCT-2008 16:29:58
Comment = single pulse decouple
Data_format = 1D COMPLEX
Dim_size = 26214
Dim_title = 13C
File_name = 13C
Dimensions = X
Ppm = X
Site = ECX400M
Spectrometer = DELTA2_WMR
Field_strength = 9.389766171 (400[MHz])
X_nucleation = 1.043331212[s]
X_domain = 13C
X_freq = 100.52530333[MHz]
X_offset = 100[ppm]
X_points = 32768
X_sweeps = 0
X_resolution = 0.95846665[Hz]
X_sweep = 31.40703518[kHz]
Irr_domain = 1H
Irr_freq = 399.78219838[MHz]
Irr_offset = 0[ppm]
Mod = PPM
Mod_return = 1
Total_scans = 2000
X_90_width = 9.41[us]
X_acq_time = 1.043331212[s]
X_angle = 45[deg]
X_atn = 7.8[db]
X_pulse = 4.7[us]
Irr_atn_dec = 21.4[db]
Irr_noise = MALZS[db]
Decoupling = TRUE
Initial_wait = 1[s]
Noe = TRUE
Rec_time = 54[s]
Relaxation_delay = 2[s]
Repetition_time = 3.043331212[s]
Temp_get = 25[dc]
    
```

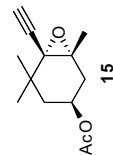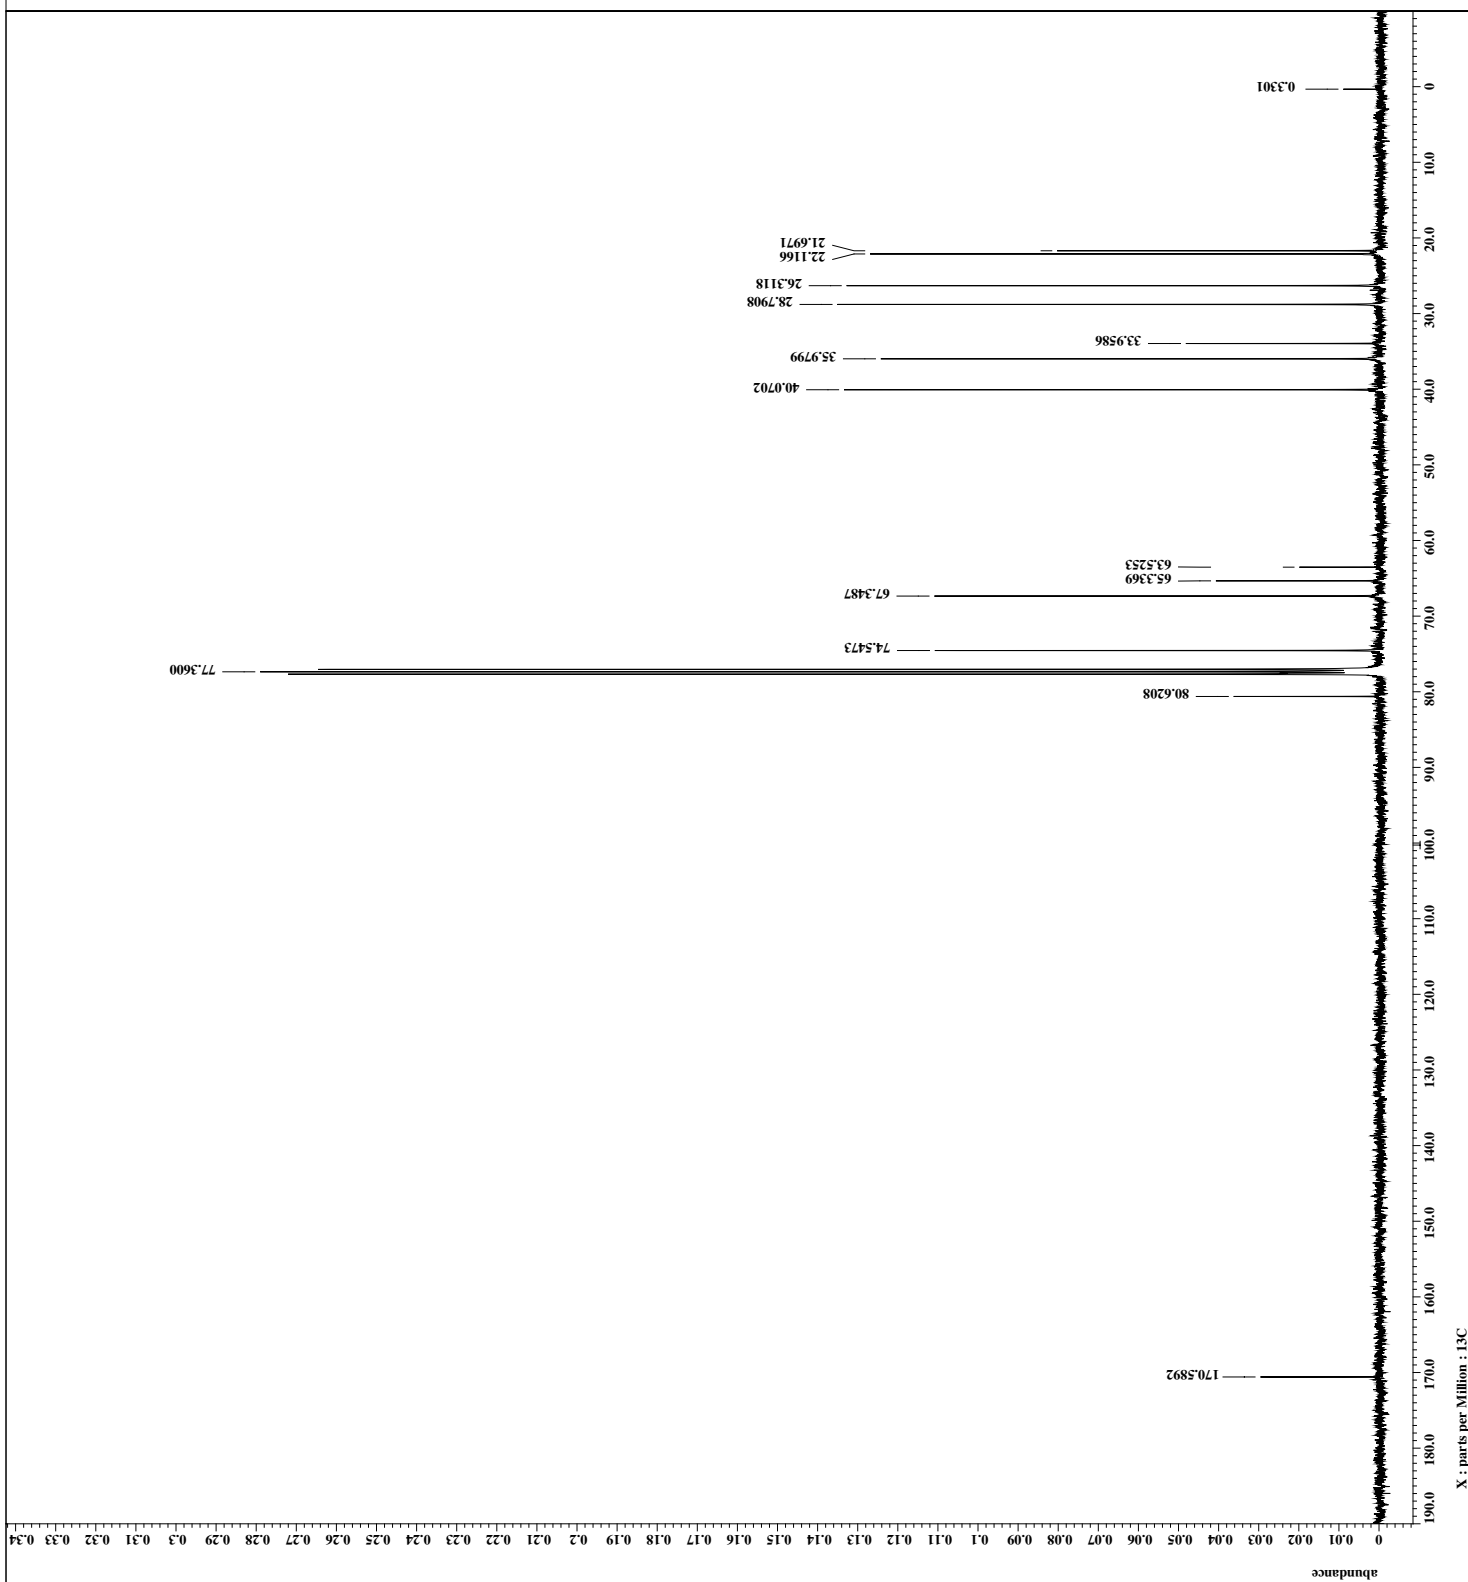

```

Filename = bl-dieneyn-alcohol-1H
Author = delta
Experiment = 1
Acq_date = 20080728
Sample_id = CHLOROFORM-D
Solvent = CHLOROFORM-D
Creation_time = 28-JUL-2006 19:51:07
Revision_time = 29-OCT-2008 17:46:25
Current_time = 29-OCT-2008 17:46:50
Comment = single pulse
Data_format = 1D COMPLEX
Dim_size = 26214
Dim_title = 1H
File_name = 1H
Dimensions = X
P1 = 12.000
P2 = 12.000
P3 = 12.000
P4 = 12.000
P5 = 12.000
P6 = 12.000
P7 = 12.000
P8 = 12.000
P9 = 12.000
P10 = 12.000
Spectrometer = ECK400M
Site = DELTA2_NMR
Field_strength = 9.39766[T] (400[MHz])
X_acq_time = 4.36731904[s]
X_domain = 1H
X_freq = 399.78219838[MHz]
X_offset = 4[ppm]
X_points = 32768
X_resolution = 0.22897343[Hz]
X_sweep = 7.5030012[kHz]
IRF_domain = 1H
IRF_freq = 399.78219838[MHz]
IRF_offset = 11[ppm]
IRF_points = 11
IRF_resolution = 0.22897343[Hz]
IRF_sweep = 7.5030012[kHz]
Tr1_freq = 399.78219838[MHz]
Tr1_offset = 5[ppm]
Clipped = FALSE
Mod_return = 1
Scans = 8
Total_scans = 8
X_90_width = 12[us]
X_acq_time = 4.36731904[s]
X_angle = 45[deg]
X_delay = 6[us]
X_pulse = 6[us]
IRF_mode = Off
Dante_preset = FALSE
Relax_wait = 2[s]
Relaxation_delay = 5[s]
Repetition_time = 9.36731904[s]
Temp_get = 24.5[dc]
    
```

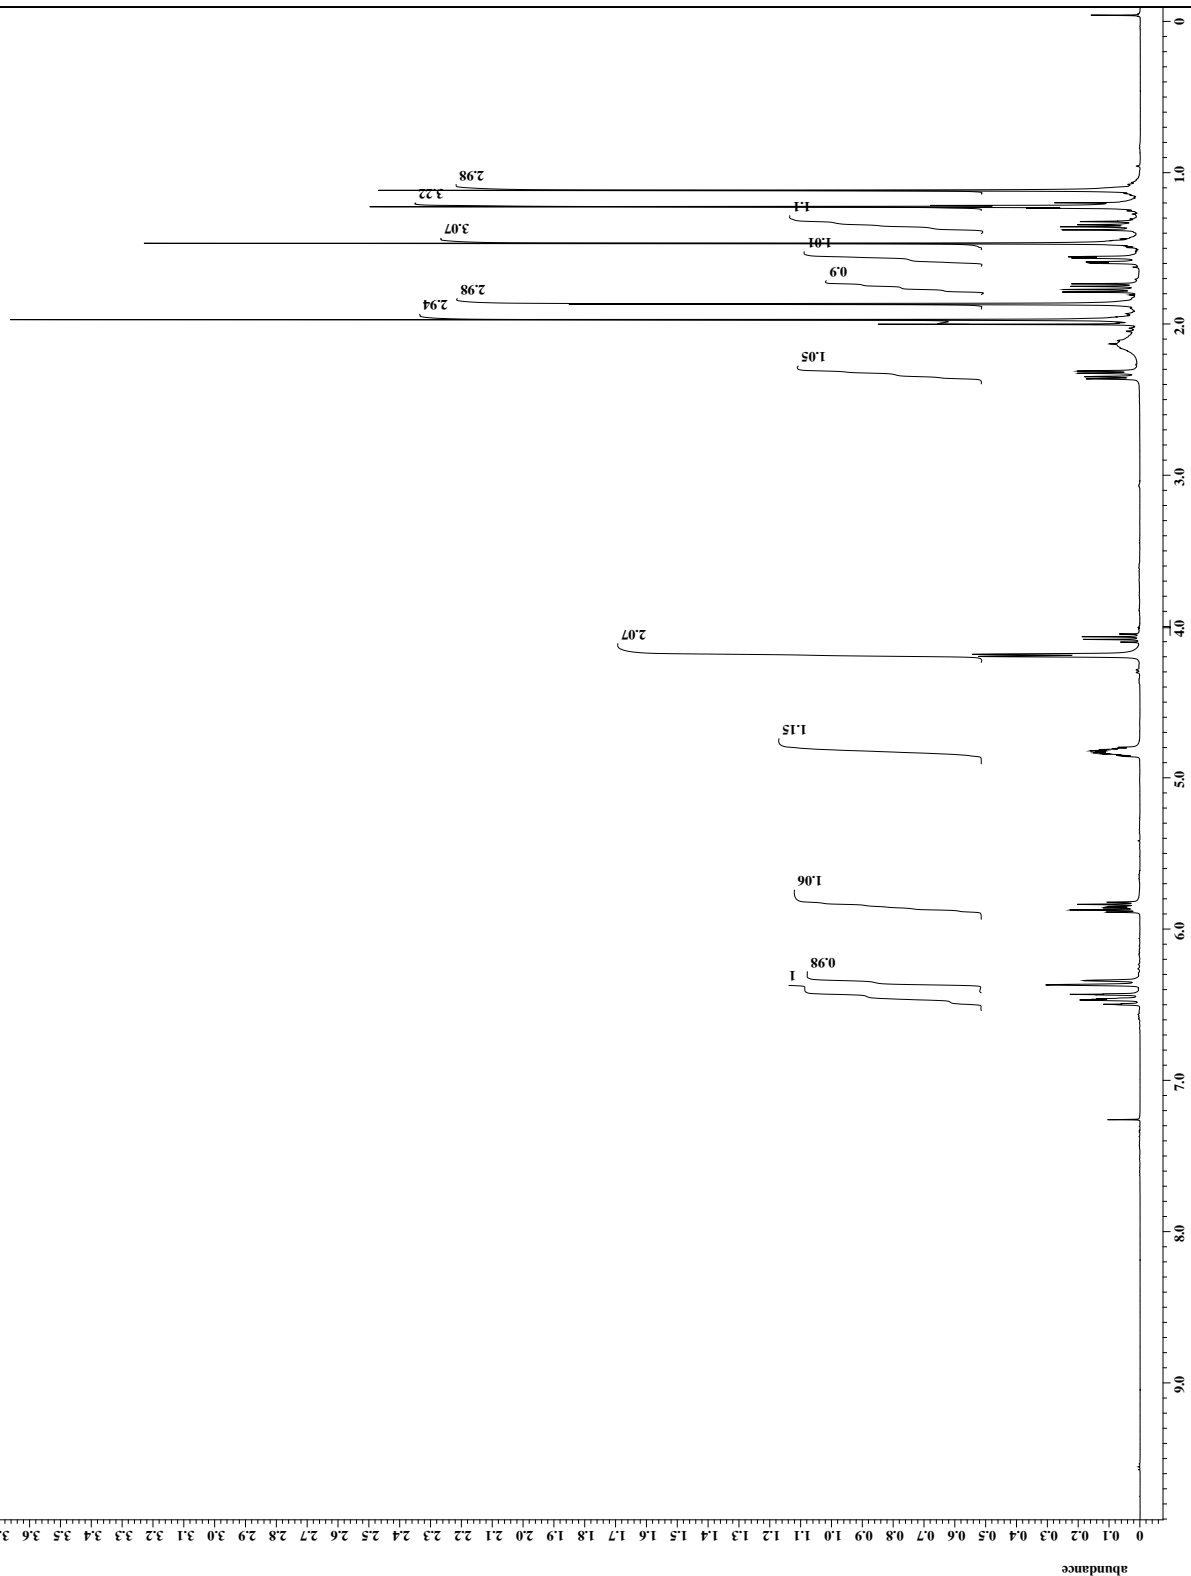



```

Filename = bi-dieneyn-alcohol-13
Author = delta
Experiment = 1
Angle_pulse_dec = 1
Sample_id = CHLOROFORM-D
Solvent = CHLOROFORM-D
Creation_time = 28-JUL-2006 21:35:09
Revision_time = 29-OCT-2008 16:31:54
Current_time = 29-OCT-2008 16:32:42
Comment = single pulse decouple
Data_format = 1D COMPLEX
Dim_size = 26214
Dim_title = 13C
File_name = 13C
Dimensions = X
Ppm = X
Site = ECK400M
Spectrometer = DELTA2_NMR
Field_strength = 9.389766171 (400[MHz])
X_coordination = 1.043333121[s]
X_domain = 13C
X_freq = 100.52530333[MHz]
X_offset = 100[ppm]
X_points = 32768
X_sans = 0
X_resolution = 0.95846665[Hz]
X_sweep = 31.40703518[kHz]
IRF_domain = 1H
IRF_freq = 399.78219838[MHz]
IRF_offset = 31[ppm]
IRF_phase = 1
Mod_return = 1
Total_scans = 2000
X_00_width = 9.4[us]
X_acq_time = 1.043333121[s]
X_angle = 45[deg]
X_atn = 7.8[db]
X_pulse = 4.7[us]
IRF_atn_dec = 21.4[db]
IRF_noise = MALZS[db]
Decoupling = TRUE
Initial_wait = 1[s]
Noe = TRUE
Rec_time = 51[s]
Relaxation_delay = 2[s]
Repetition_time = 3.043333121[s]
Temp_get = 24.7[dc]
    
```

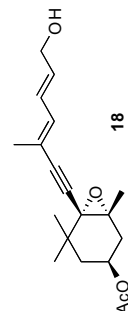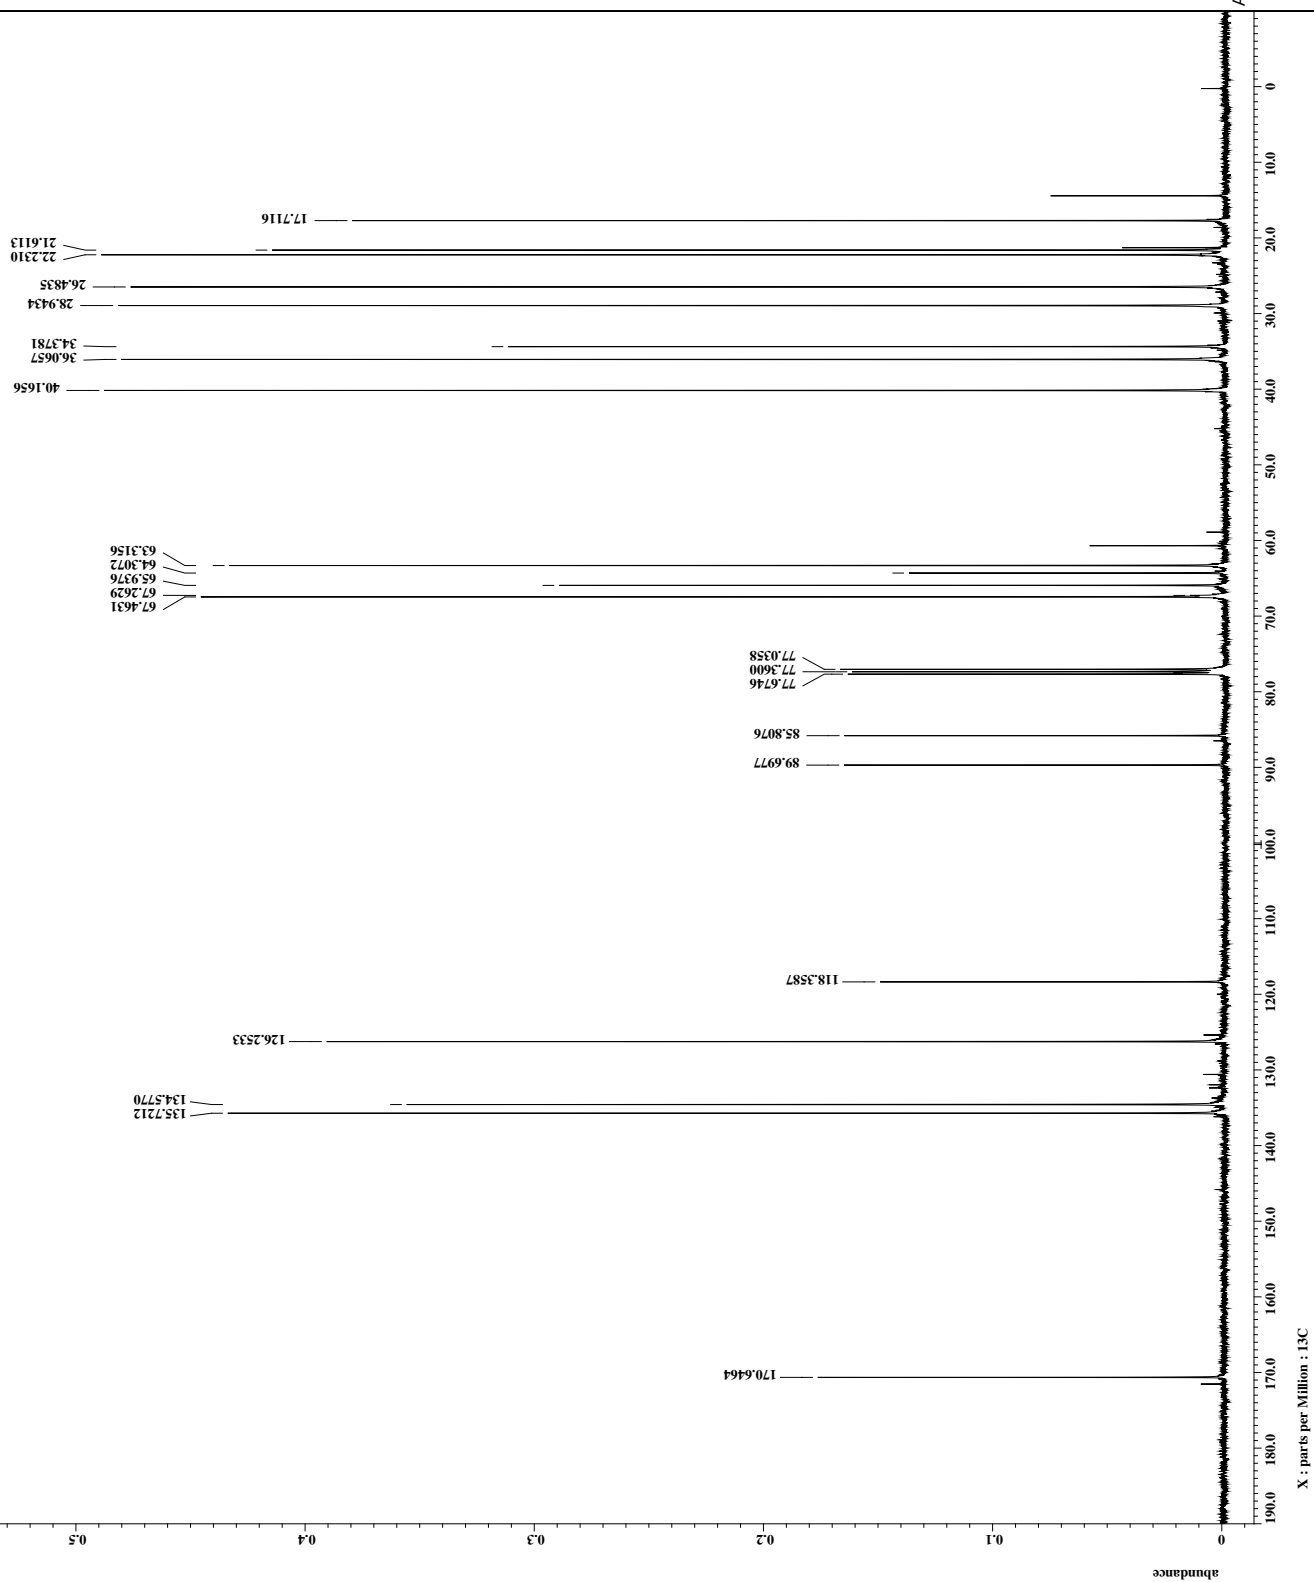

```

Filename = b1-sulfide-1H-2-j4f
Author = delta
Experiment = 1
Angle_pulse_ex2
Sample_id = CHLOROFORM-D
Solvent = CHLOROFORM-D
Creation_time = 7-JUL-2006 16:30:25
Revision_time = 29-OCT-2008 17:50:25
Current_time = 29-OCT-2008 17:50:37
Comment = single pulse
Data_format = 1D COMPLEX
Dim_size = 26214
Dim_title = 1H
File_name = 1
Dimensions = X
Ppm = X
Spectrum = ECK400M
Spectrometer = DELTA2_NMR
Field_strength = 9.389766 [T] (400 [MHz])
X_acq_time = 4.36731904 [s]
X_domain = 1H
X_freq = 399.78219838 [MHz]
X_offset = 4 [ppm]
X_points = 32768
X_resolution = 0.22887343 [Hz]
X_sweep = 7.5030012 [kHz]
Irr_domain = 1H
Irr_freq = 399.78219838 [MHz]
Irr_offset = 11 [ppm]
Irr_power = 11
P1 = 399.78219838 [MHz]
P1_offset = 5 [ppm]
Clipped = FALSE
Mod_return = 1
Scans = 8
Total_scans = 8
X_90_width = 12 [us]
X_acq_time = 4.36731904 [s]
X_angle = 45 [deg]
X_p1 = 6 [us]
X_pulse = 6 [us]
Irr_mode = Off
Irr_modulation = Off
Dante_preset = FALSE
Relaxation_wait = 3 [s]
Relaxation_time = 38
Relaxation_delay = 5 [s]
Repetition_time = 9.36731904 [s]
Temp_get = 24.5 [dc]
    
```

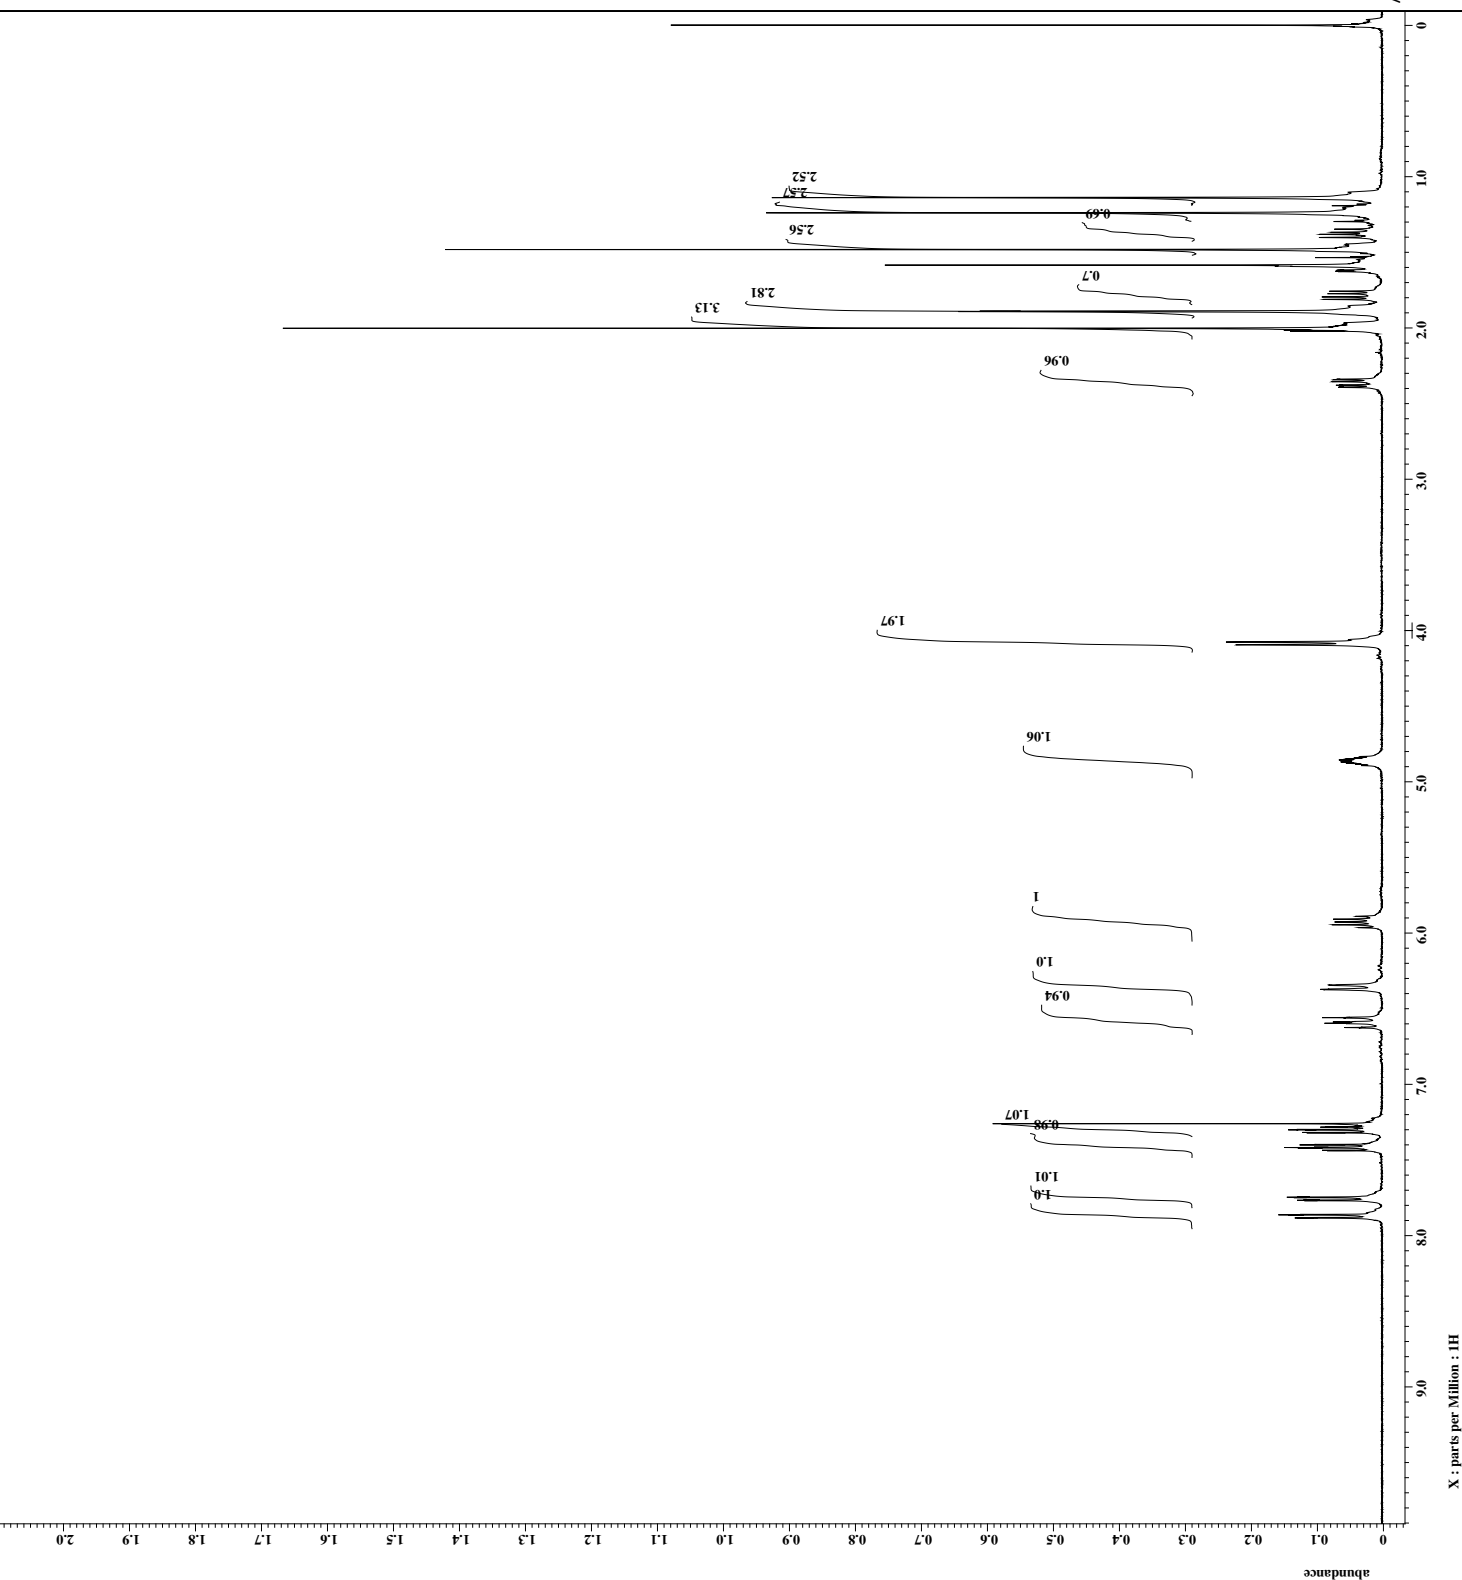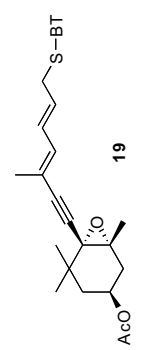

```

Filename = bl-sulfide-13c-3.jdf
Author = delta
Experiment = delta_pulse_dec
Sample_id = S1609517
Solvent = CHLOROFORM-D
Creation_time = 7-JUL-2006 17:10:23
Revision_time = 29-OCT-2008 17:06:45
Current_time = 29-OCT-2008 17:07:05
Comment = single pulse decouple
Data_format = 1D COMPLEX
Dim_size = 26214
Dim_title = 13C
F2 = 100
F3 = 100 [ppm]
Dimensions = X
Site = ECK400M
Spectrometer = DELTA2_WMR
Field_strength = 9.389766 [T] (400 [MHz])
X_nutation = 1.0433312 [s]
X_domain = 13C
X_freq = 100.5253033 [MHz]
X_offset = 100 [ppm]
X_points = 32768
X_sweeps = 1
X_resolution = 0.9584665 [Hz]
X_sweep = 31.40703518 [kHz]
Irr_domain = 1H
Irr_freq = 399.78219838 [MHz]
Irr_offset = 0 [ppm]
Mod = 1
Mod_return = 1
Total_scans = 571
X_00_width = 9.4 [us]
X_acq_time = 1.0433312 [s]
X_angle = 45 [deg]
X_atn = 7.8 [dB]
X_pulse = 4.7 [us]
Irr_atn_dec = 21.4 [dB]
Irr_noise = MALZ
Decoupling = TRUE
Initial_wait = 1 [s]
Noe = TRUE
Rec_time = 56 [s]
Relaxation_delay = 2 [s]
Repetition_time = 3.0433312 [s]
Temp_get = 24.8 [degC]
    
```

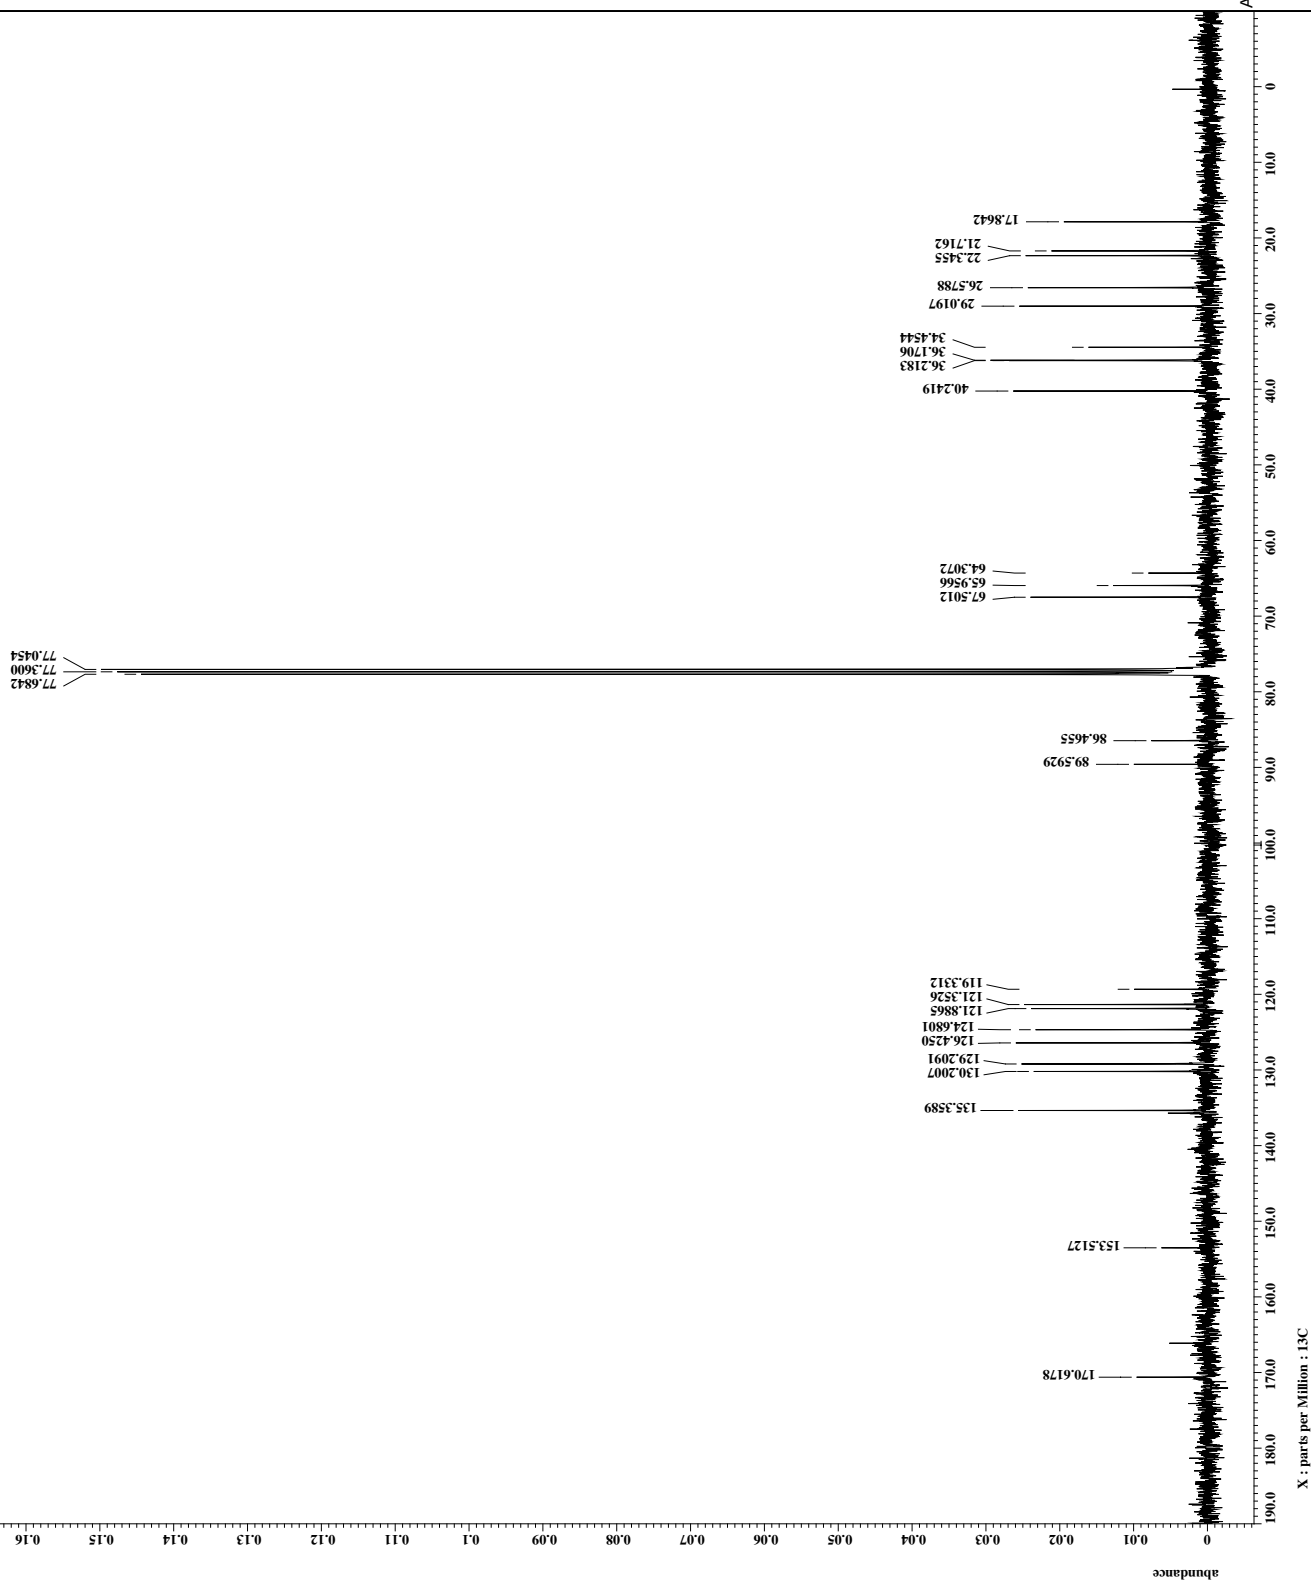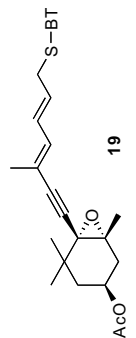

X : parts per Million : 13C

```

Filename = bl-sulfone-1H-2-j4f
Author = delta
Experiment = 1
Sample_id = 1
Solvent = CHLOROFORM-D
Creation_time = 8-JUL-2006 12:07:32
Revision_time = 29-OCT-2008 17:53:57
Current_time = 29-OCT-2008 17:54:13
Comment = single pulse
Data_format = 1D COMPLEX
Dim_size = 26214
Dim_title = 1H
Dimensions = X
Site = ECK400M
Spectrometer = DELTA2_NMR
Field_strength = 9.369766 [T] (400 [MHz])
X_acq_time = 4.36731904 [s]
X_domain = 1H
X_freq = 399.78219838 [MHz]
X_offset = 4 [ppm]
X_points = 32768
X_resolution = 0.22897343 [Hz]
X_sweep = 7.5030012 [kHz]
IRF_domain = 1H
IRF_freq = 399.78219838 [MHz]
IRF_offset = 11 [ppm]
IRF_resolution = 0.22897343 [Hz]
IRF_sweep = 7.5030012 [kHz]
Mod_return = FALSE
Scans = 1
Total_scans = 8
X_90_width = 12 [us]
X_acq_time = 4.36731904 [s]
X_angle = 45 [deg]
X_pulse = 6 [us]
IRF_mode = Off
Dante_preset = FALSE
Relax_wait = 3 [s]
Relaxation_delay = 5 [s]
Repetition_time = 9.36731904 [s]
Temp_get = 24.3 [degC]
    
```

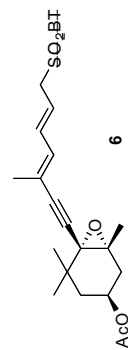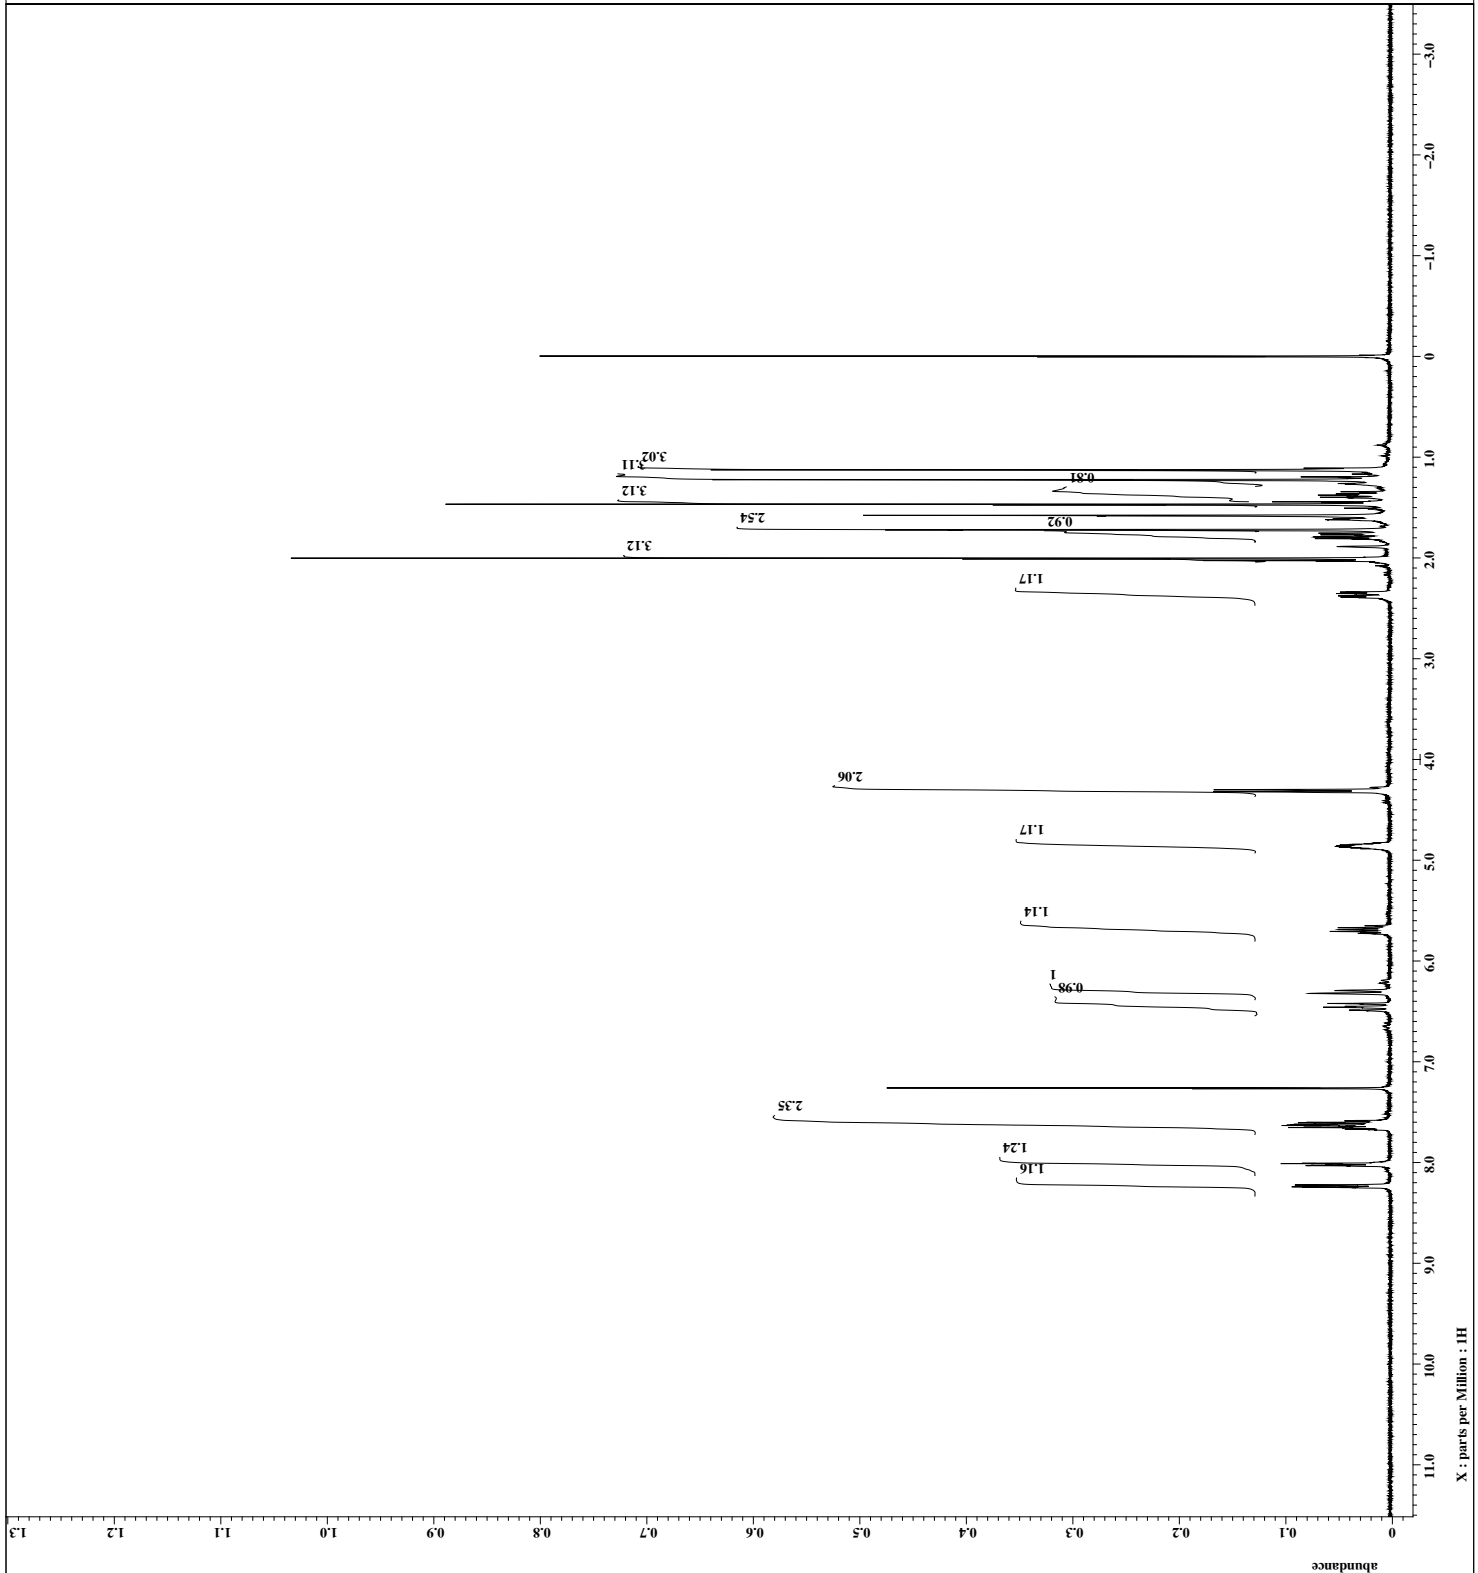

```

Filename = bl-sulfone-13c-4_3.fdf
Author =
Experiment = delta
Sample_id = S4450415
Solvent = CHLOROFORM-D
Creation_time = 8-JUL-2006 12:55:53
Revision_time = 29-OCT-2008 17:07:52
Current_time = 29-OCT-2008 17:08:14
Comment = single pulse decouple
Data_format = 1D COMPLEX
Dim_size = 26214
Dim_title = 13C
File_name =
Dimensions = X [ppm]
Site = ECK400M
Spectrometer = DELTA2_NMR
Field_strength = 9.389766 [T] (400 [MHz])
X_coordination = 1.0433312 [s]
X_domain = 13C
X_freq = 100.5253033 [MHz]
X_offset = 100 [ppm]
X_points = 32768
X_resolution = 0.9584665 [Hz]
X_sweep = 31.40703518 [kHz]
Irr_domain = 1H
Irr_freq = 399.78219838 [MHz]
Irr_offset = 51 [ppm]
Modulation = PULS
Mod_return = 1
Total_scans = 781
X_00_width = 9.4 [us]
X_acq_time = 1.0433312 [s]
X_angle = 45 [deg]
X_atn = 7.8 [dB]
X_pulse = 4.7 [us]
Irr_atn_dec = 21.4 [dB]
Irr_noise = MALZ
Decoupling = TRUE
Initial_wait = 1 [s]
Noe = TRUE
Rec_time = 5 [s]
Relaxation_delay = 2 [s]
Repetition_time = 3.0433312 [s]
Temp_get = 24.6 [degC]
    
```

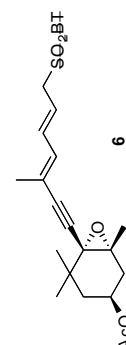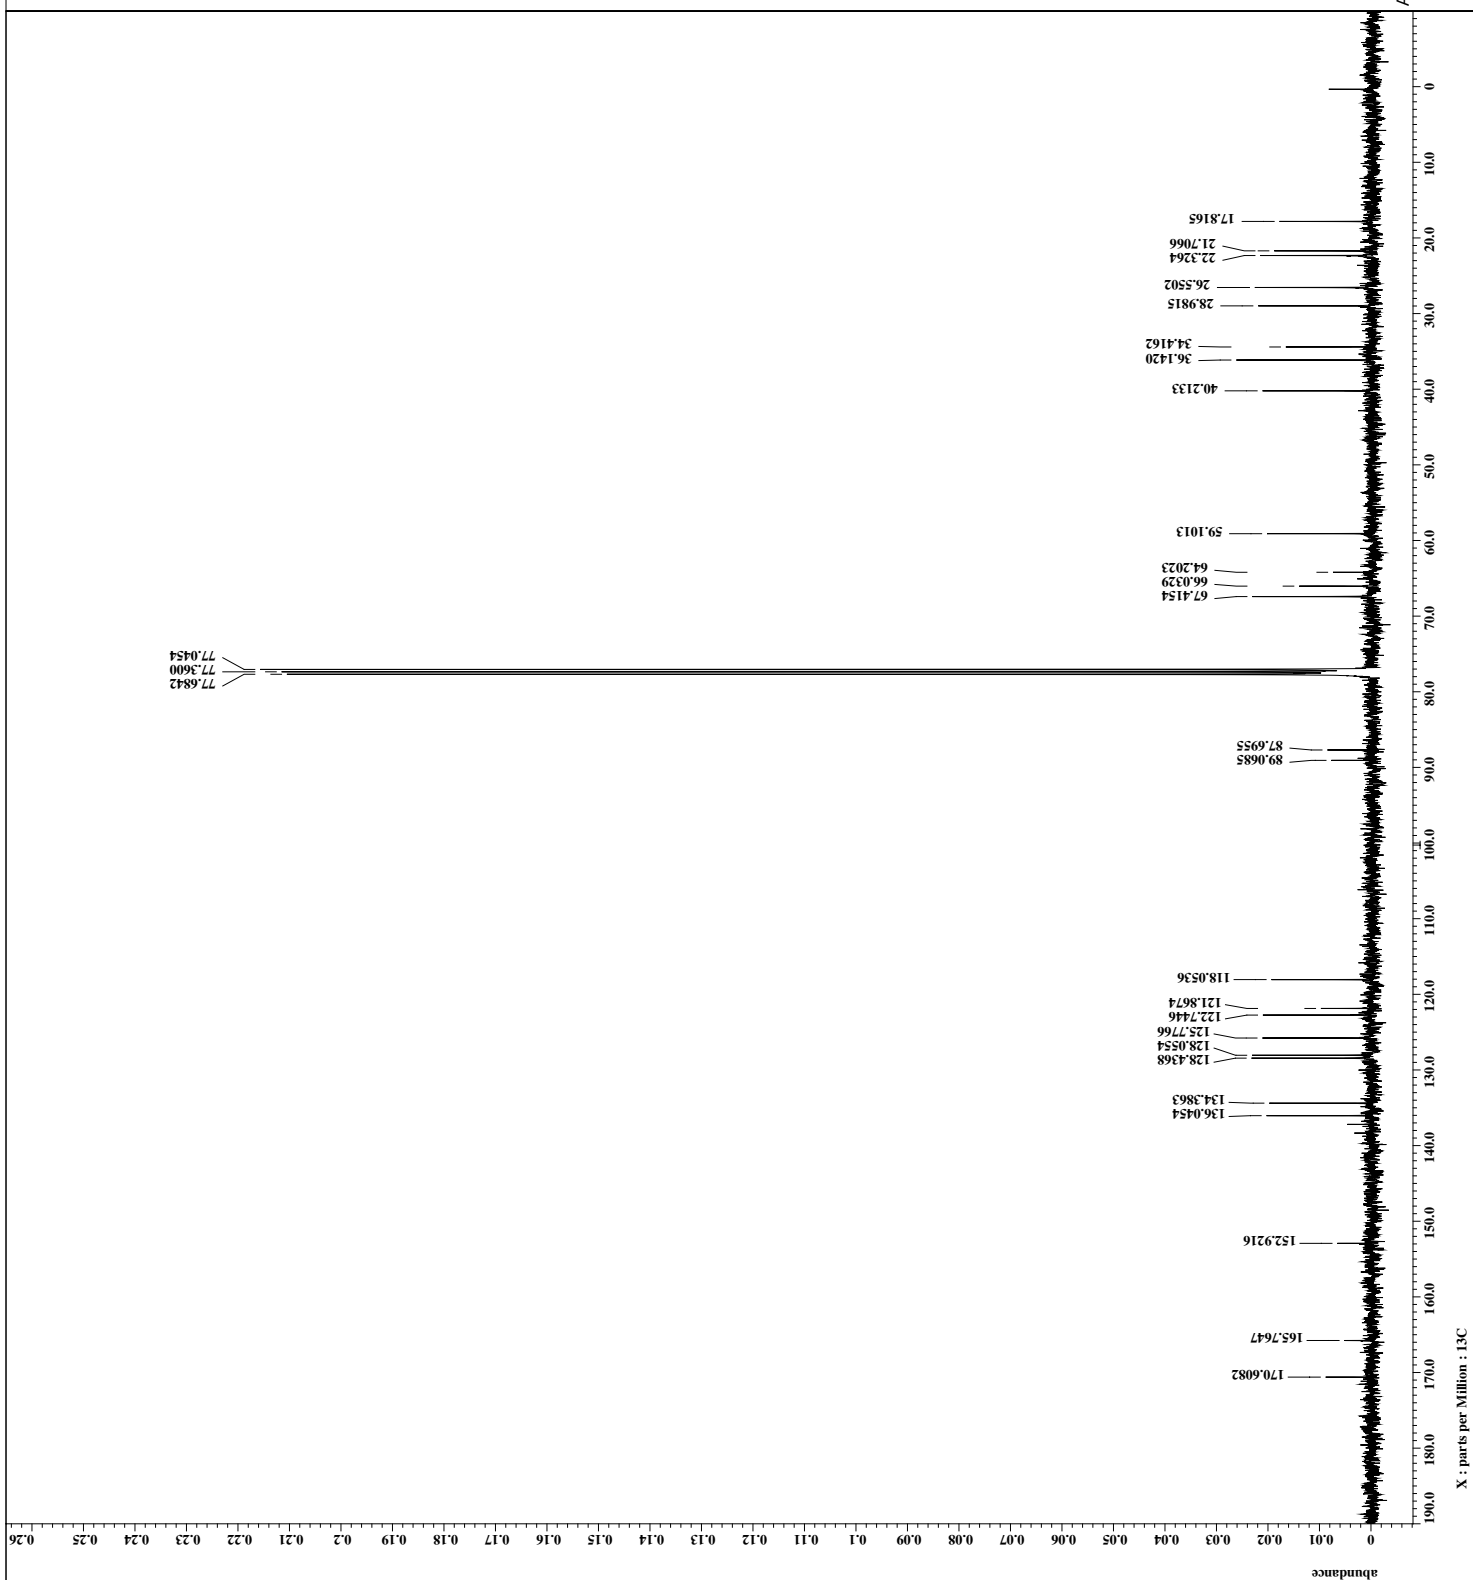

DFILE 1r  
COMNT katsum750\_12.1.1  
DATIM Thu Sep 18 11:07:06 2008  
OBNUC 1H  
EXMOD zg30  
OBFRQ 750.13 MHz  
OBSET 3.60 KHz  
OBFIN 0.62 Hz  
POINT 32768  
FREQU 11261.26 Hz  
SCANS 16  
ACQTM 2.9098 sec  
PD 1.0000 sec  
PW1 10.55 usec  
IRNUC  
CTEMP 26.9 c  
SLVNT C6D6  
EXREF 7.16 ppm  
BF 0.30 Hz  
RGAIN 128

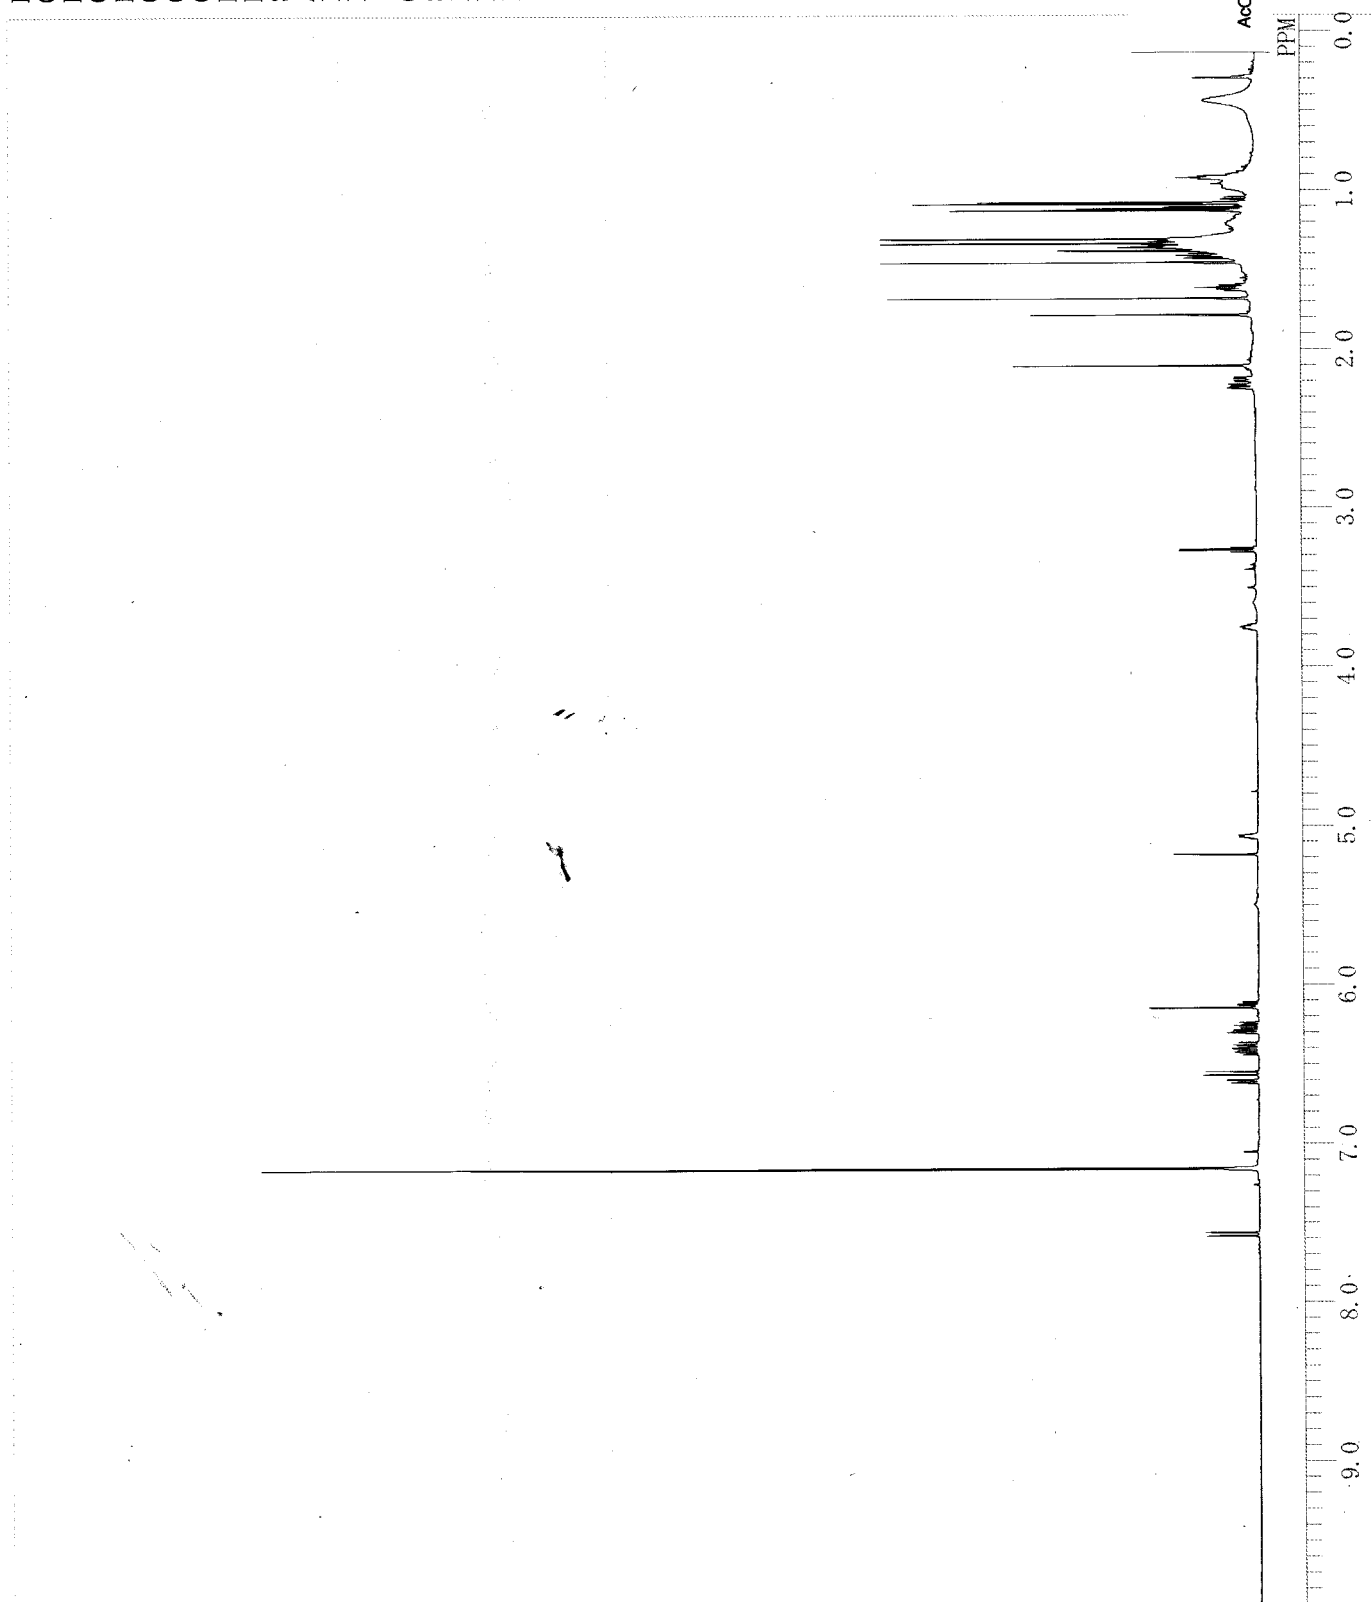

DFILE l\_r  
COMNT katsum750\_12.1000.1  
DATIM Thu Sep 18 13:19:12 2008  
13C  
OBNUC zgpg30  
EXMOD 188.63 MHz  
OBFRQ 9.20 KHz  
OBSET 0.56 Hz  
OBFIN 32768  
POINT 45045.05 Hz  
SCANS 16384  
ACQTM 0.7275 sec  
PD 2.0000 sec  
PW1 15.00 usec  
IRNUC 26.9 c  
CTEMP CDC13  
SLVNT  
EXREF 219.62 ppm  
BF 1.00 Hz  
RGAIN 4096

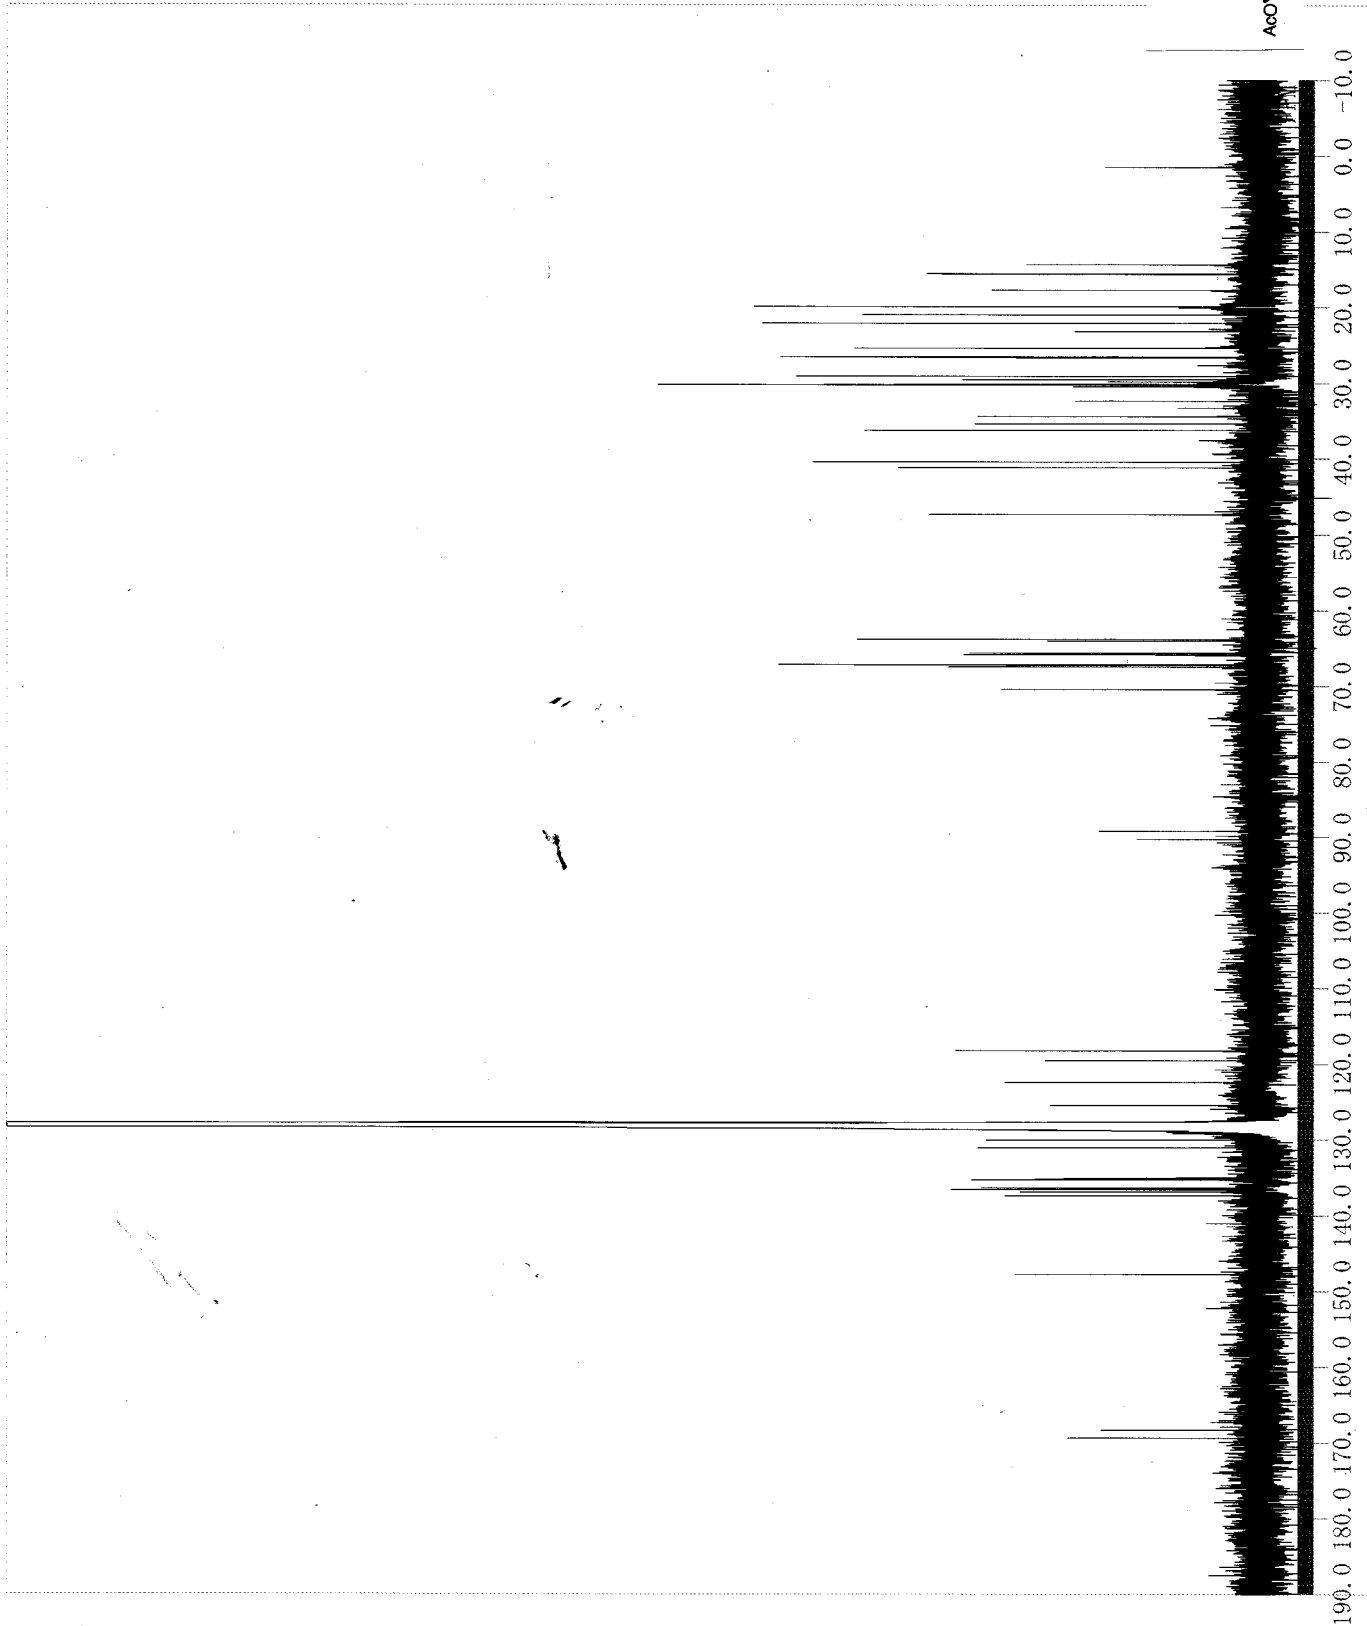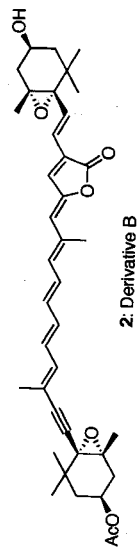

```

Filename = cl-acetyl-stannane-1H
Author = delta
Experiment = 1
Acq_pulse = ex2
Sample_id = CHLOROFORM-D
Solvent = CHLOROFORM-D
Creation_time = 31-JUL-2006 09:35:13
Revision_time = 30-OCT-2008 10:12:18
Current_time = 30-OCT-2008 10:12:44
Comment = single pulse
Data_format = 1D COMPLEX
Dim_size = 26214
Dim_title = 1H
F2 = 400
F3 = 400
Dimensions = X
Site = ECK400M
Spectrometer = DELTA2_NMR
Field_strength = 9.369766 [T] (400 [MHz])
X_acquisition = 4.36731904 [s]
X_domain = 1H
X_freq = 399.78219838 [MHz]
X_offset = 4 [ppm]
X_points = 32768
X_resolution = 0.22887343 [Hz]
X_sweep = 7.5030012 [kHz]
IRF_domain = 1H
IRF_freq = 399.78219838 [MHz]
IRF_offset = 11 [ppm]
IRF_resolution = 0.22887343 [Hz]
IRF_sweep = 7.5030012 [kHz]
Tr1_freq = 399.78219838 [MHz]
Tr1_offset = 5 [ppm]
Clipped = FALSE
Mod_return = 1
Scans = 8
Total_scans = 8
X_90_width = 12 [us]
X_acq_time = 4.36731904 [s]
X_angle = 45 [deg]
X_calibration = 0.00000000 [ppm]
X_pulse = 6 [us]
IRF_mode = Off
Dante_preset = FALSE
Relax_wait = 2 [s]
Relaxation_delay = 5 [s]
Repetition_time = 9.36731904 [s]
Temp_get = 22.4 [degC]
    
```

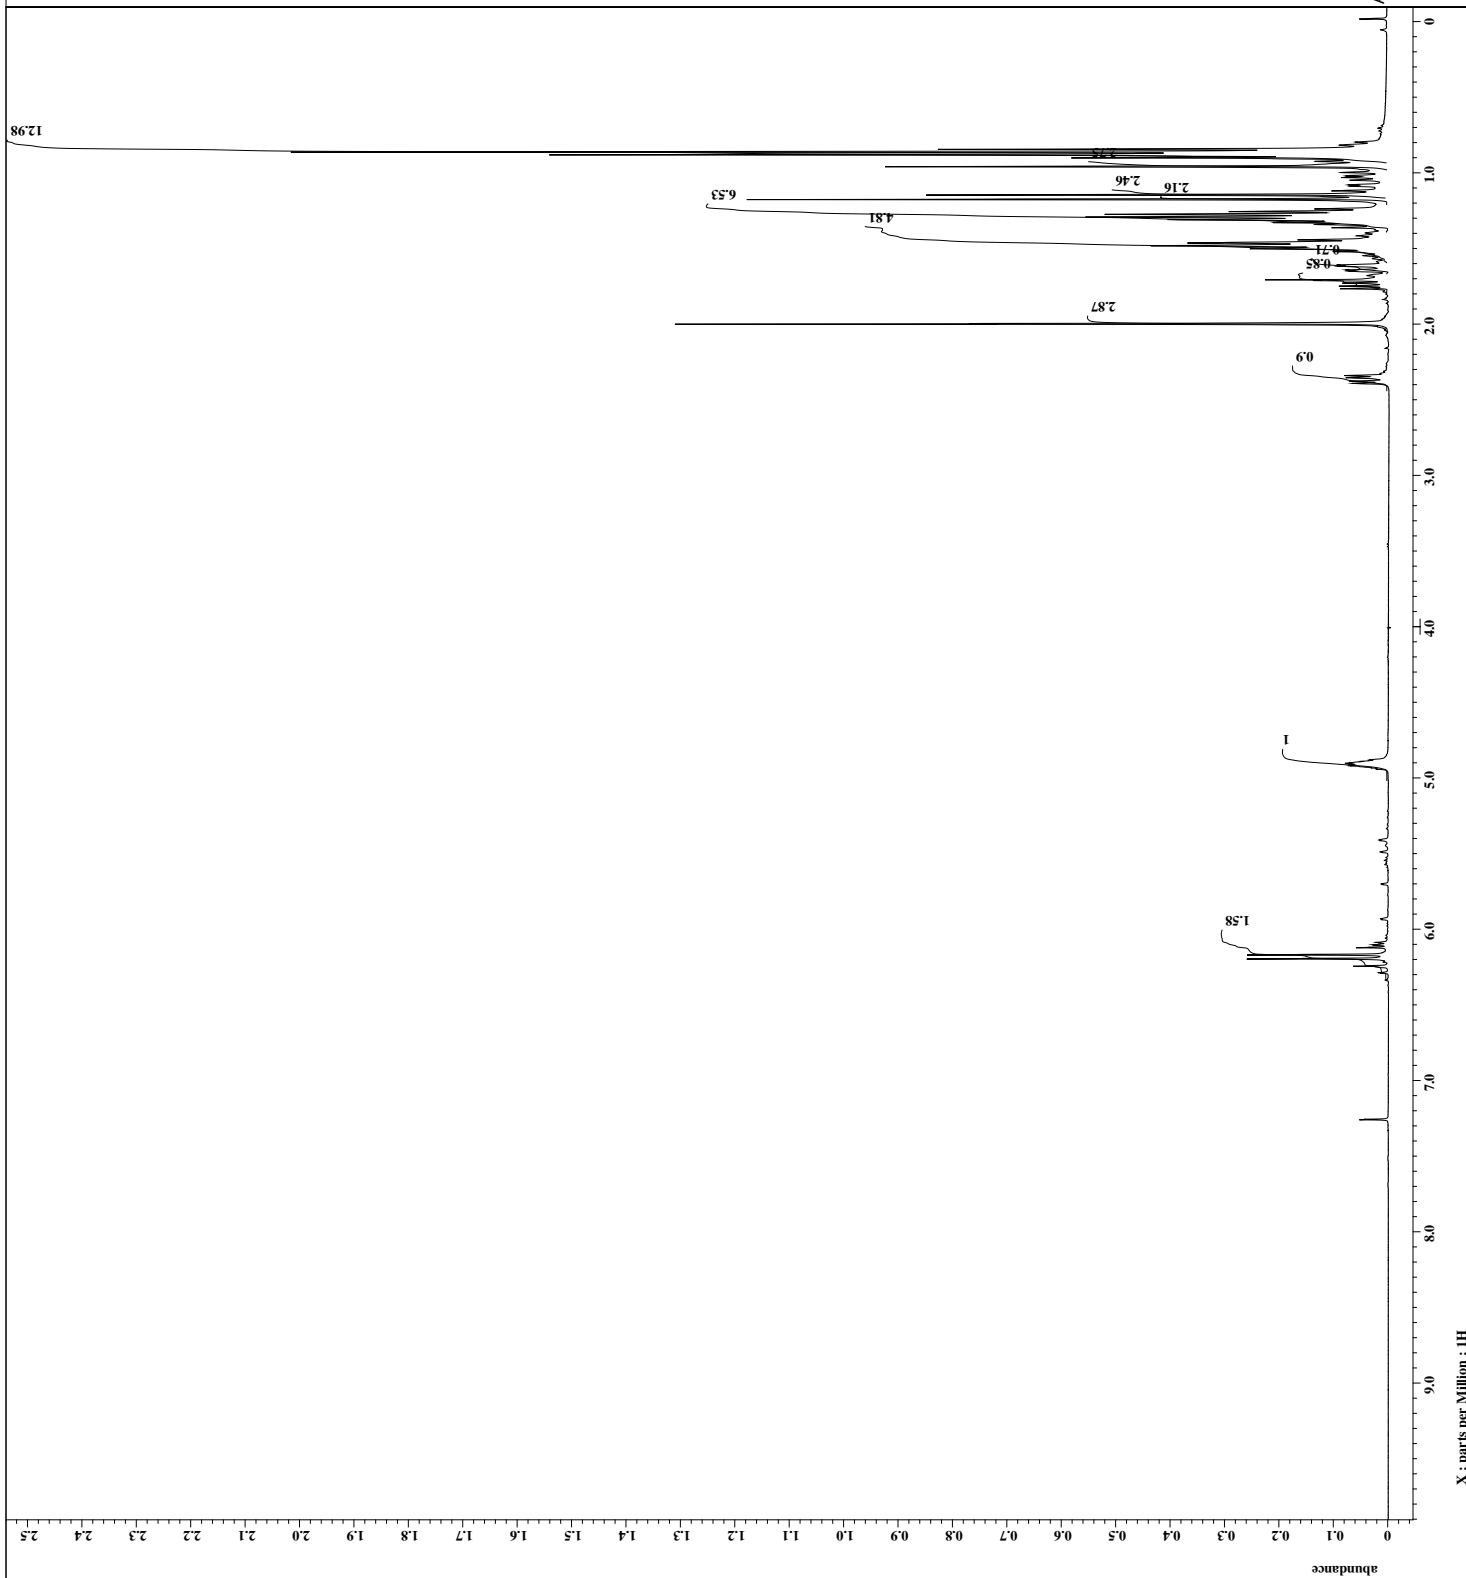



```

Filename = cl-acetyl-stannane-13
Author =
Experiment =
Sample_id =
Solvent = CHLOROFORM-D
Creation_time = 31-JUL-2006 10:35:24
Revision_time = 29-OCT-2008 17:02:06
Current_time = 29-OCT-2008 17:03:59
Comment = single pulse decouple
Data_format = 1D COMPLEX
Dim_size = 26214
Dim_title =
Dim_units =
Dimensions =
Ppm =
Spectrometer = ECK400M
Site = DELTA2_NMR
Field_strength = 9.389766171 (400[MHz])
X_nucleation = 1.043333121[s]
X_domain = 13C
X_freq = 100.52530333[MHz]
X_offset = 100[ppm]
X_points = 32768
X_resolution =
X_sweep = 0.95846665[Hz]
X_ticks = 1H
X_freq_domain = 31.40703518[kHz]
X_freq_offset = 399.78219838[MHz]
X_offset_ppm = 1[ppm]
Mod_return = 1
Total_scans = 1143
X_90_width = 9.4[us]
X_acq_time = 1.043333121[s]
X_angle = 45[deg]
X_atn = 7.8[db]
X_pulse = 4.7[us]
Irr_atn_dec = 21.4[db]
Irr_noise_db =
Irr_noise = MALZ
Decoupling = TRUE
Initial_wait = 1[s]
Noe =
Rec_time =
Relaxation_time = 5[s]
Relaxation_delay = 2[s]
Repetition_time = 3.043333121[s]
Temp_get = 22.9[degC]
    
```

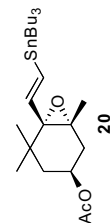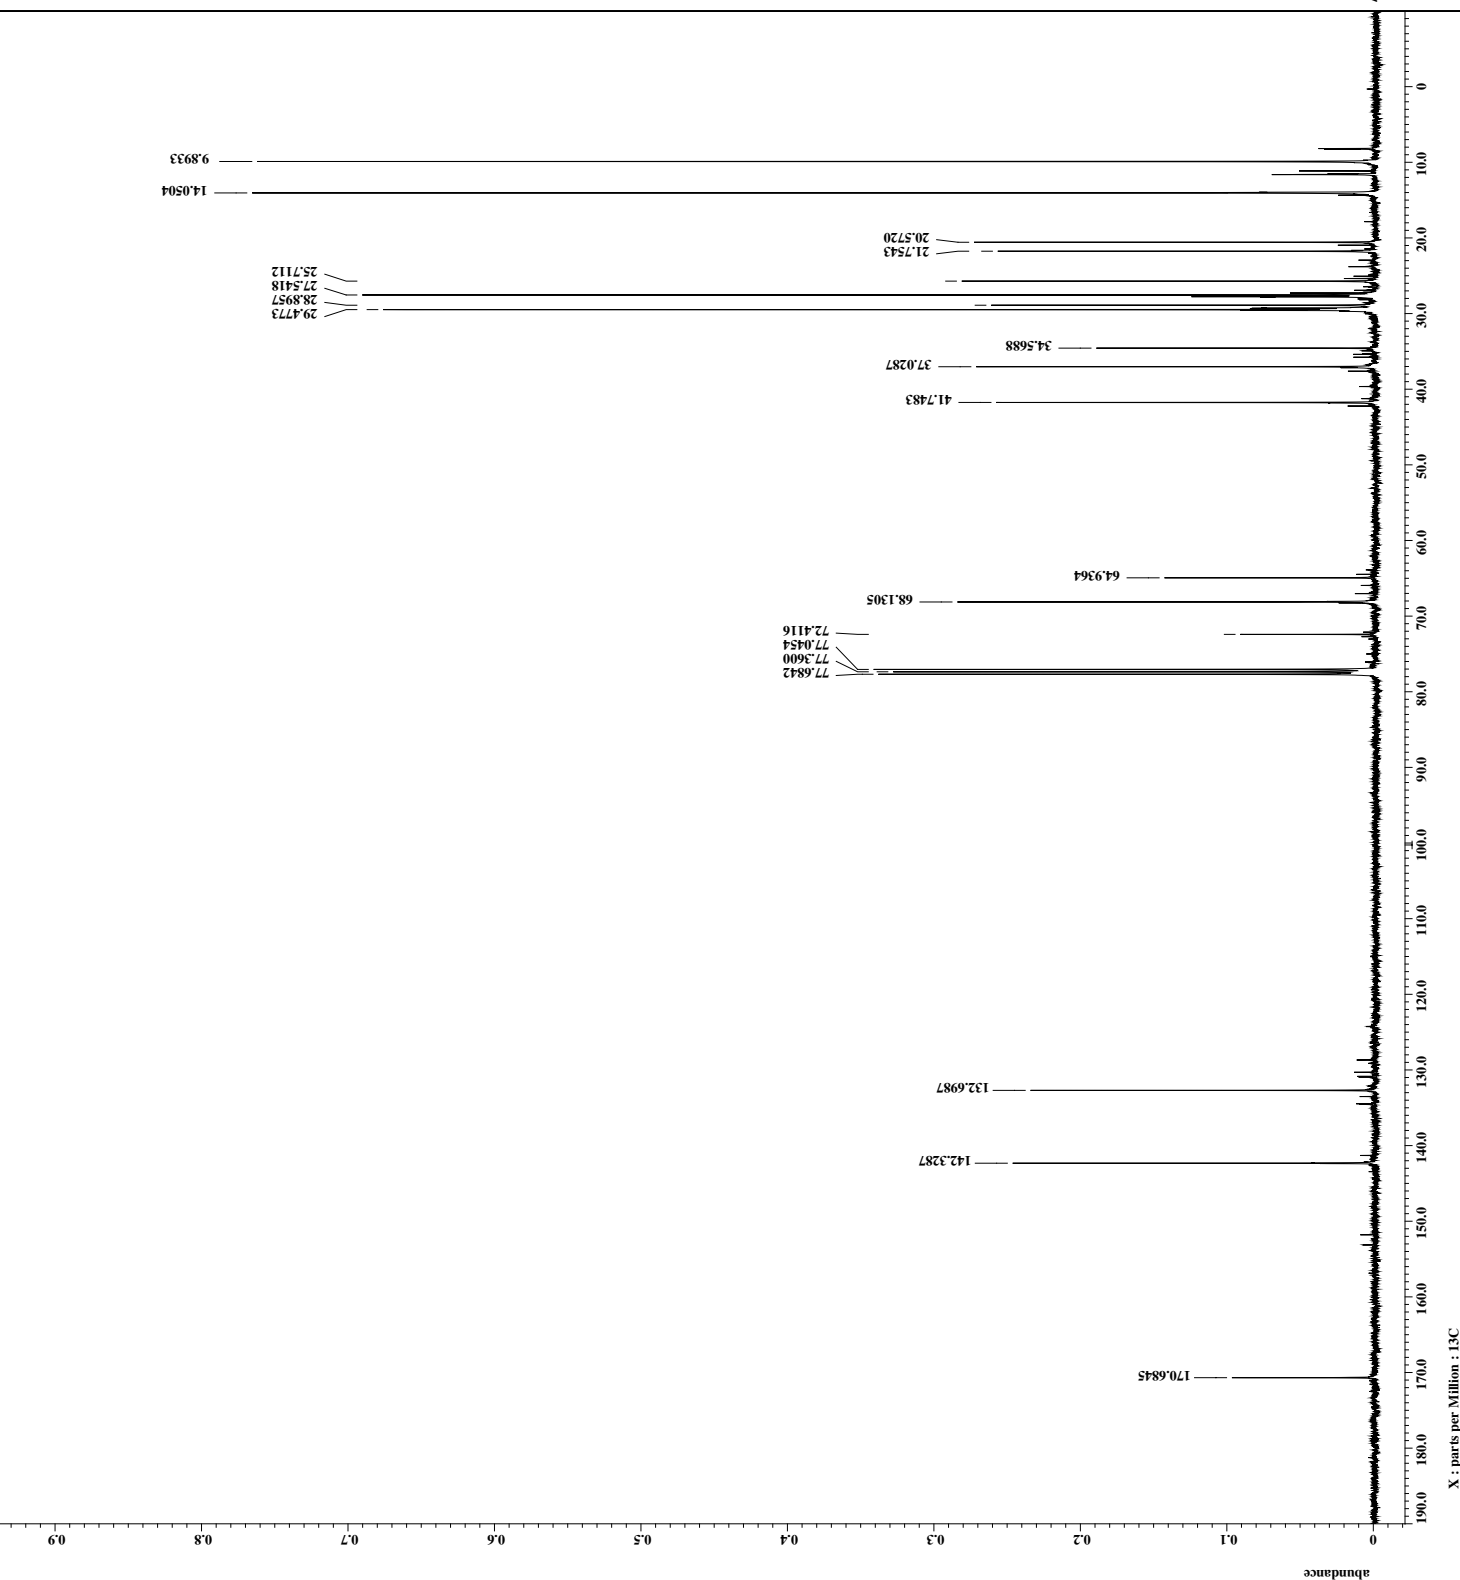

```

Filename = cl-acetyl-iodide-1H-2
Author = delta
Experiment = 1
Sample_id = 1
Solvent = CHLOROFORM-D
Creation_time = 31-JUL-2006 23:38:17
Revision_time = 30-OCT-2008 10:09:13
Current_time = 30-OCT-2008 10:09:46
Comment = single pulse
Data_format = 1D COMPLEX
Dim_size = 26214
Dim_title = 1H
Dimensions = X [ppm]
Site = ECK400M
Spectrometer = DELTA2_NMR
Field_strength = 9.389766 [T] (400 [MHz])
X_acquisition = 4.36731904 [s]
X_domain = 1H
X_freq = 399.78219838 [MHz]
X_offset = 4 [ppm]
X_points = 32768
X_resolution = 0.22887343 [Hz]
X_sweep = 7.5030012 [kHz]
Irr_domain = 1H
Irr_freq = 399.78219838 [MHz]
Irr_offset = 1 [ppm]
Irr_points = 11
Irr_resolution = 0.22887343 [Hz]
Irr_sweep = 7.5030012 [kHz]
Tr1_freq = 399.78219838 [MHz]
Tr1_offset = 5 [ppm]
Clipped = FALSE
Mod_return = 1
Scans = 8
Total_scans = 8
X_90_width = 12 [us]
X_acq_time = 4.36731904 [s]
X_angle = 45 [deg]
X_p1 = 6 [us]
X_pulse = 6 [us]
Irr_mode = Off
Irr_mods = Off
Dante_preset = FALSE
Relax_wait = 2 [s]
Relaxation_delay = 5 [s]
Repetition_time = 9.36731904 [s]
Temp_get = 23.1 [degC]
    
```

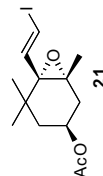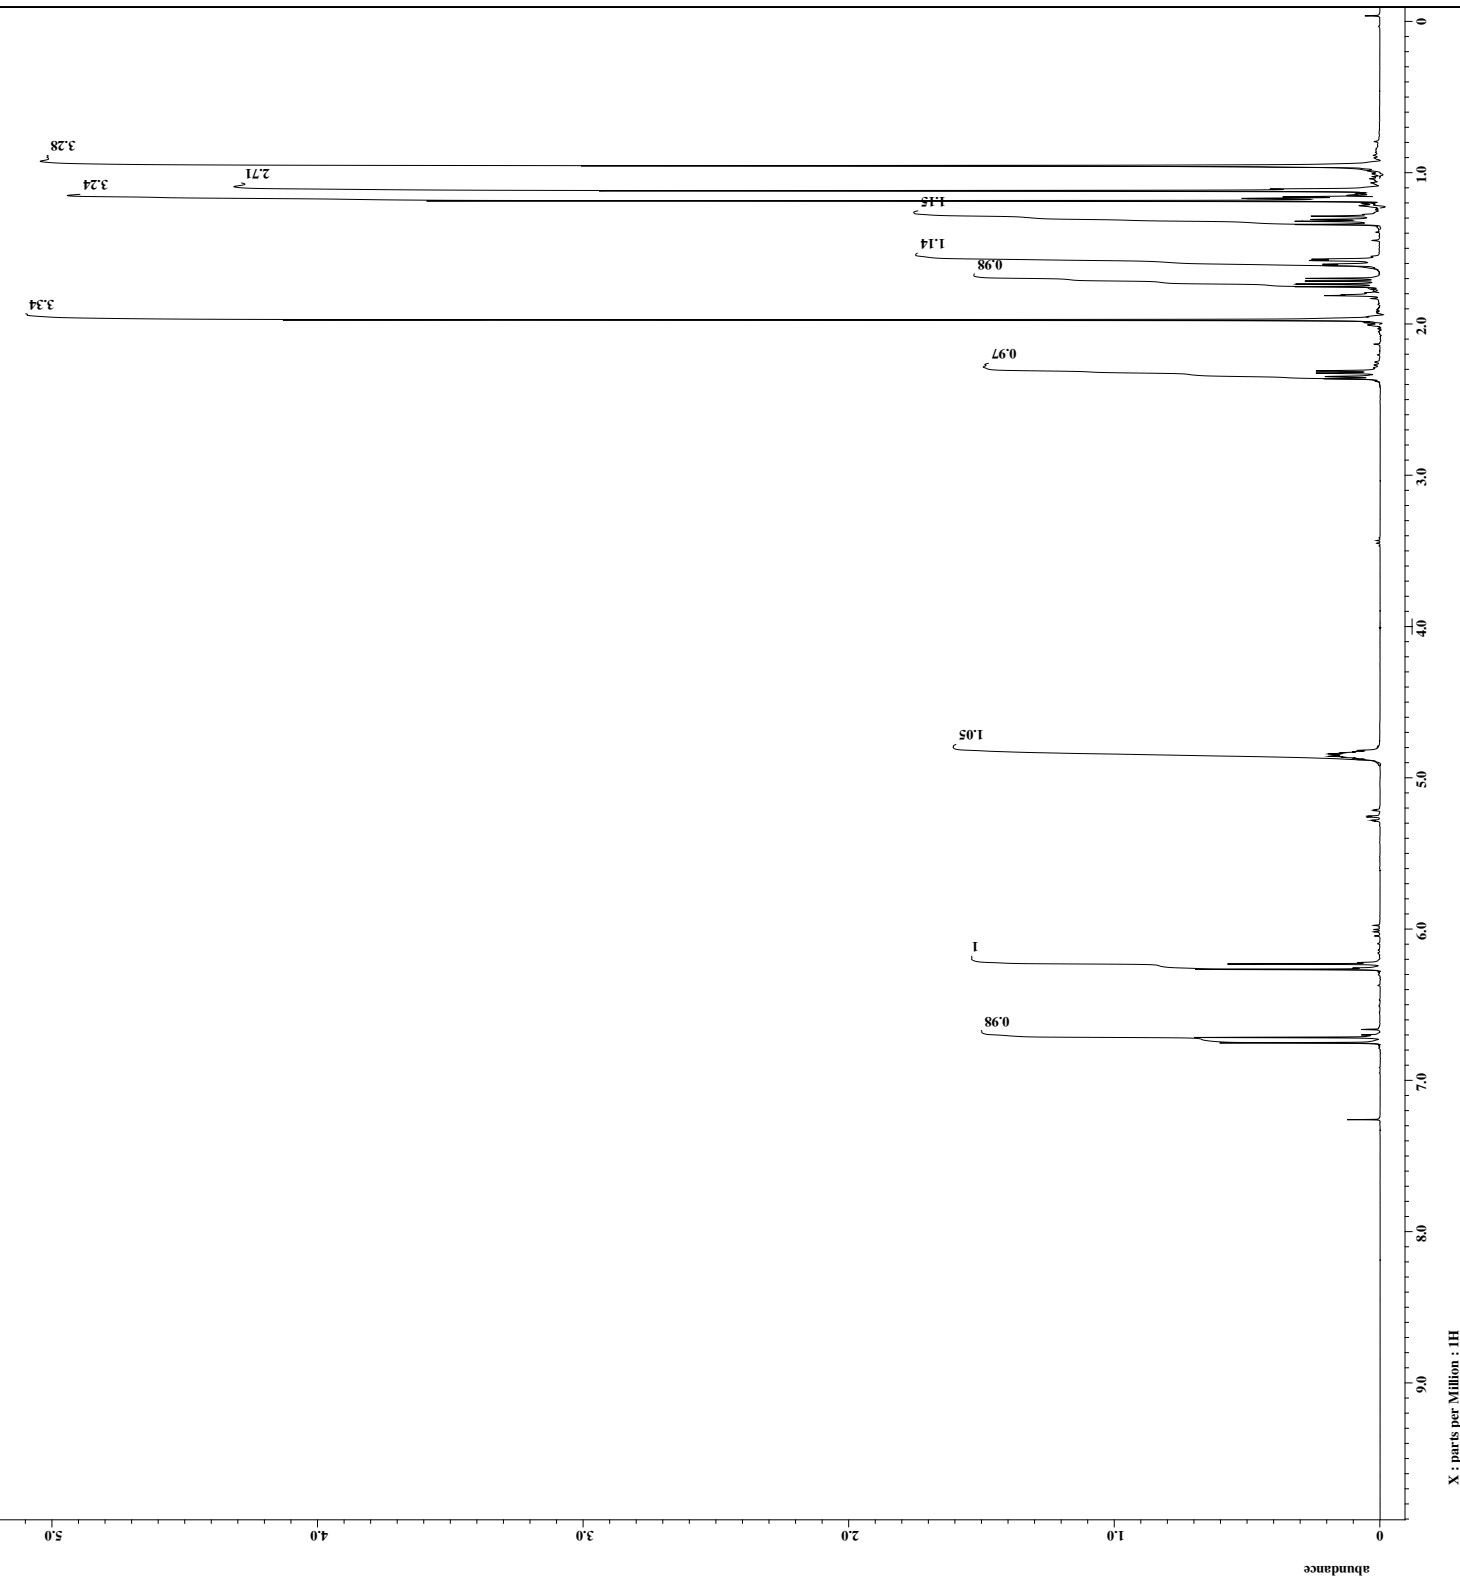

```

Filename = cl-acetyl-iodide-13C-
Author = delta
Experiment = 1
Angle_pulse_dec = 1
Sample_id = CHLOROFORM-D
Solvent = CHLOROFORM-D
Creation_time = 1-AUG-2006 01:22:05
Revision_time = 29-OCT-2008 17:11:09
Current_time = 29-OCT-2008 17:12:24
Comment = single pulse decouple
Data_format = 1D COMPLEX
Dim_size = 26214
Dim_title = 13C
File_name = 13C
Dimensions = X [ppm]
Site = ECK400M
Spectrometer = DELTA2_NMR
Field_strength = 9.389766 [T] (400 [MHz])
X_coordination = 1.0433312 [s]
X_domain = 13C
X_freq = 100.52530333 [MHz]
X_offset = 100 [ppm]
X_points = 32768
X_resolution = 0.9584665 [Hz]
X_sweep = 31.40703518 [kHz]
Irr_domain = 1H
Irr_freq = 399.78219838 [MHz]
Irr_offset = 5 [ppm]
Mod_return = 1
Total_scans = 2000
X_00_width = 9.4 [us]
X_acq_time = 1.0433312 [s]
X_angle = 45 [deg]
X_atn = 7.8 [dB]
X_pulse = 4.7 [us]
Irr_atn_dec = 21.4 [dB]
Irr_noise = MALZ
Decoupling = TRUE
Initial_wait = 1 [s]
Noe = TRUE
Rec_time = 50 [s]
Relaxation_delay = 2 [s]
Repetition_time = 3.0433312 [s]
Temp_get = 23.6 [degC]
    
```

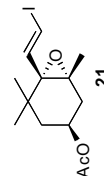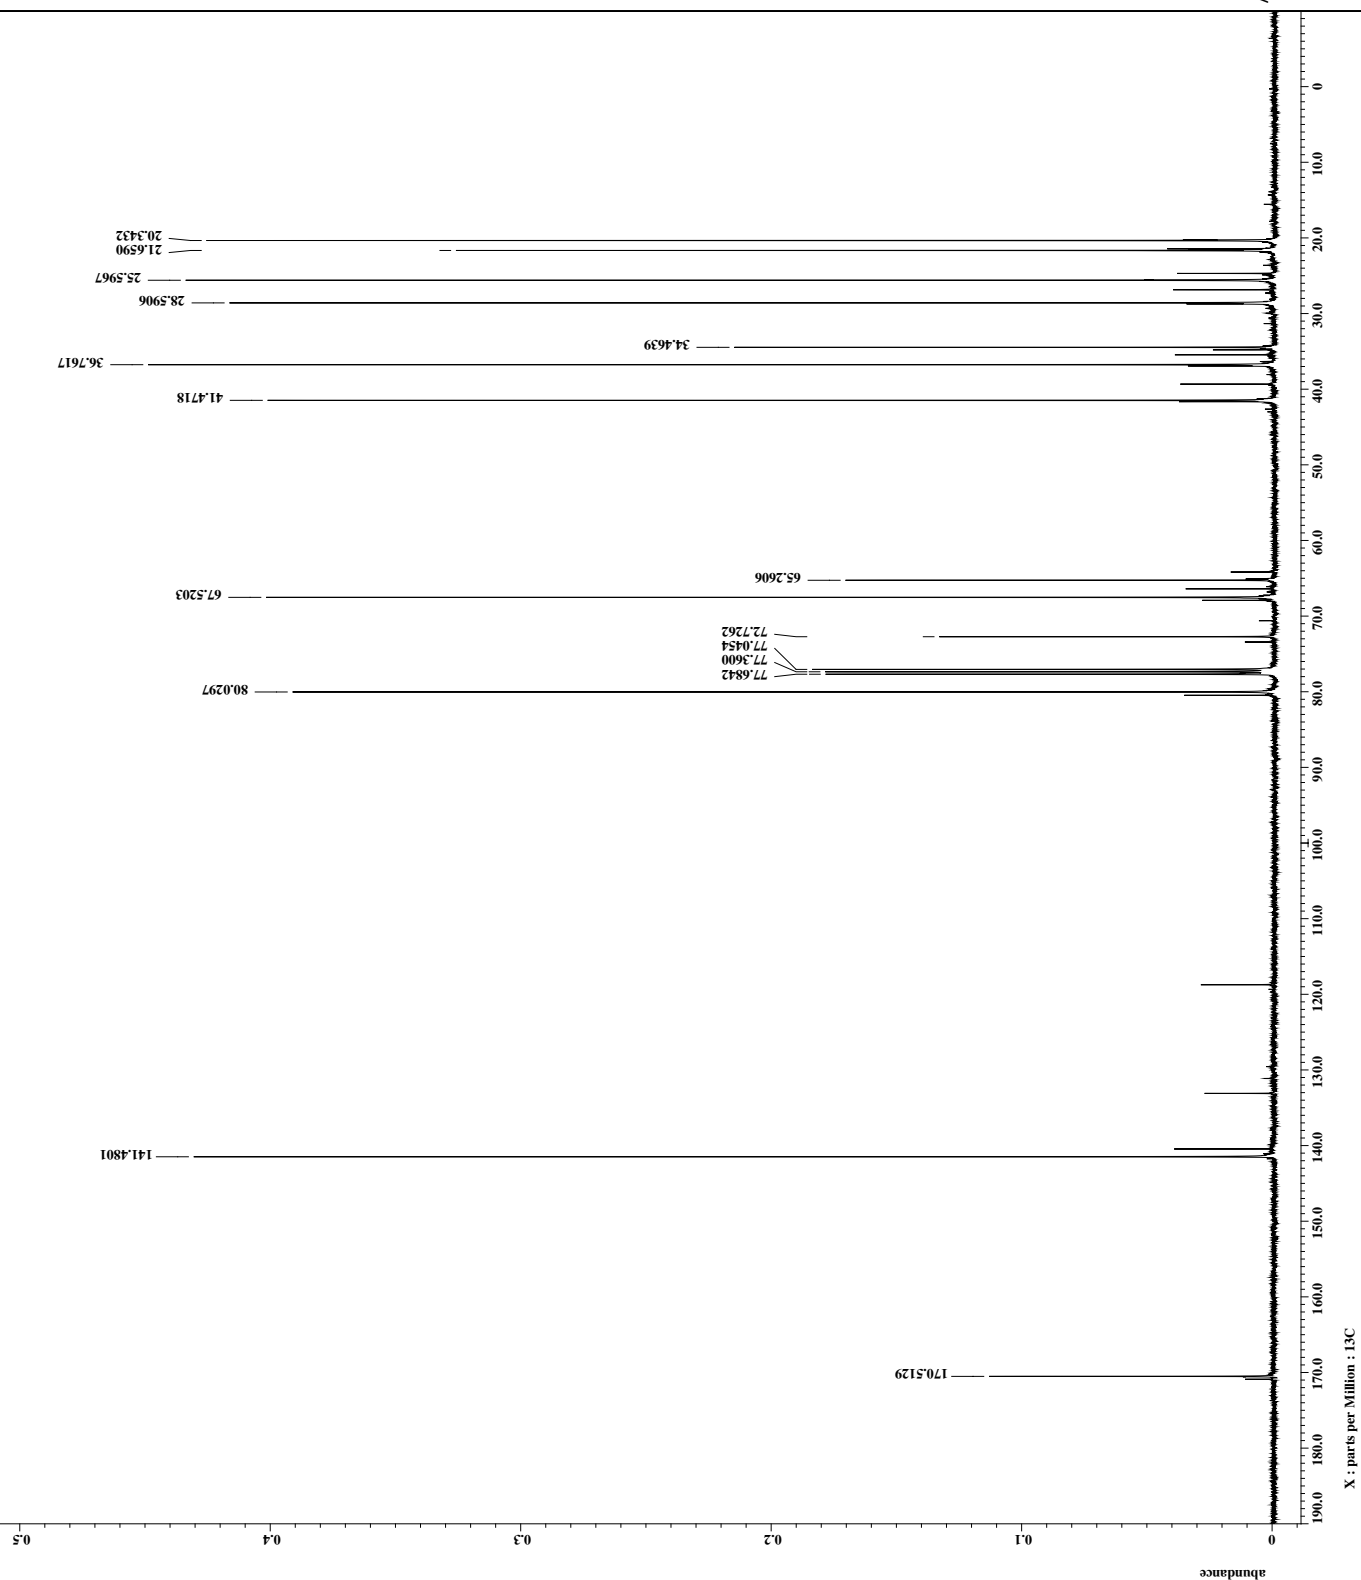

```
Filename = ci-tin-ester-1R-2.j4f
Author = delta
Experiment = 1
Angle_pulse_ex2 = 1
Sample_id = CHLOROFORM-D
Solvent = CHLOROFORM-D
Creation_time = 29-JUL-2006 13:36:30
Revision_time = 30-OCT-2008 11:12:29
Current_time = 30-OCT-2008 11:12:55
Comment = single pulse
Data_format = 1D COMPLEX
Dim_size = 26214
Dim_title = 1R
F1 = 1R
F2 = X
F3 = X
F4 = X
Dimensions = X
Site = ECK400M
Spectrometer = DELTA2_WMR
Field_strength = 9.389765[T] (400[MHz])
X_acq_time = 4.36731904[s]
X_angle = 12[us]
X_domain = 1H
X_freq = 399.78219838[MHz]
X_offset = 4[ppm]
X_points = 32768
X_resolution = 0.22887343[Hz]
X_sweep = 7.5030012[kHz]
IR_domain = 1H
IR_freq = 399.78219838[MHz]
IR_offset = 11[ppm]
IR_resolution = 11[ppm]
TR_freq = 399.78219838[MHz]
TR_offset = 5[ppm]
Clipped = FALSE
Mod_return = 1
Scans = 8
Total_scans = 8
X_90_width = 12[us]
X_acq_time = 4.36731904[s]
X_angle = 45[deg]
X_domain = 1H
X_freq = 399.78219838[MHz]
X_offset = 6[ppm]
X_points = 65536
X_resolution = 6[ppm]
X_sweep = 6[ppm]
IR_mode = Off
IR_resolution = Off
IR_sweep = Off
Dante_preset = FALSE
Fid_wait = 2[s]
Relaxation_delay = 5[s]
Repetition_time = 9.36731904[s]
Temp_get = 23.6[dc]
```

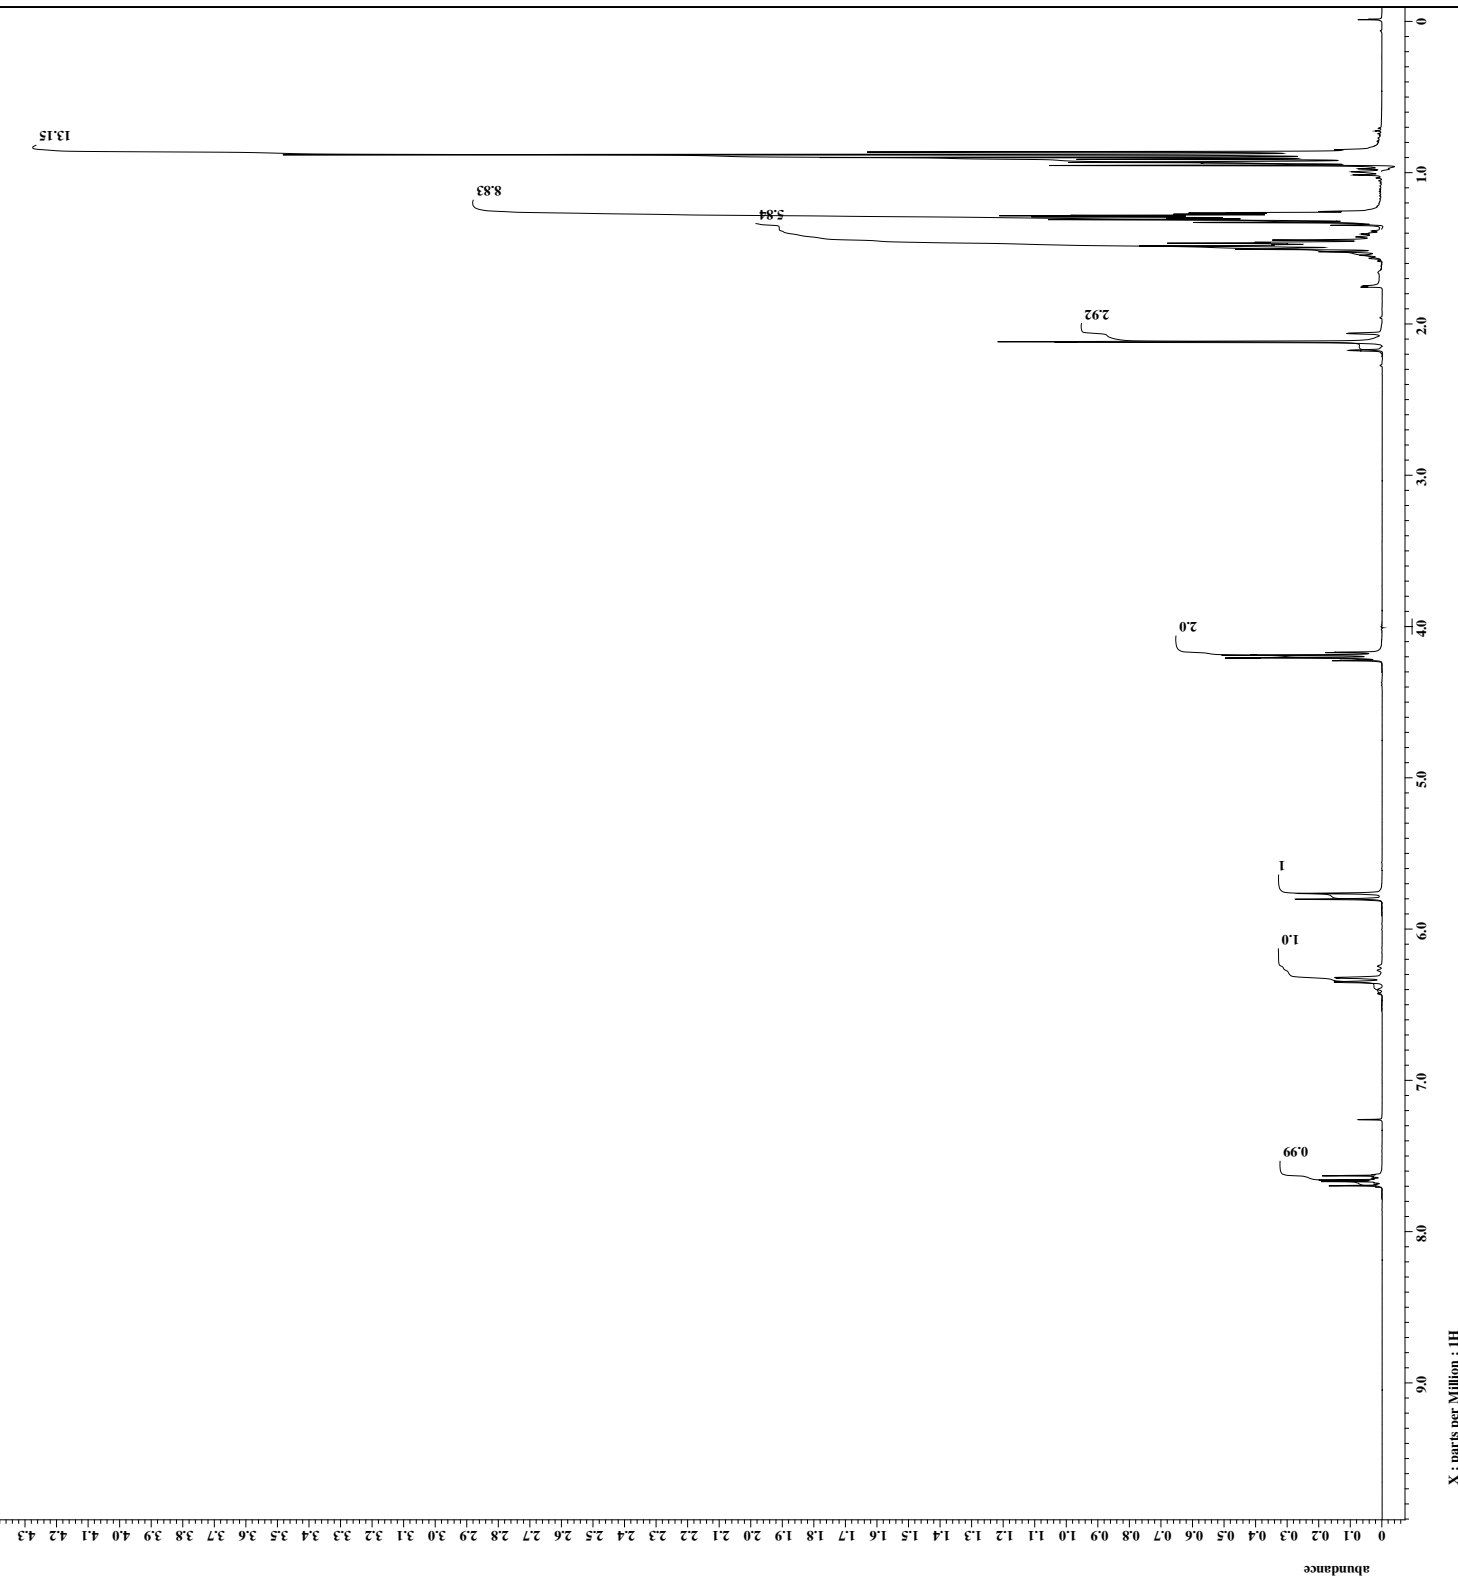

```

Filename = ci-tin-ester-13C-2.fid
Author = delta
Experiment = 1
Angle_pulse_dec = 1
Sample_id = CHLOROFORM-D
Solvent = CHLOROFORM-D
Creation_time = 29-JUL-2006 14:39:22
Revision_time = 29-OCT-2008 17:13:59
Current_time = 29-OCT-2008 17:14:46
Comment = single pulse decouple
Data_format = 1D COMPLEX
Dim_size = 26214
Dim_title = 13C
File_name = 13C
F1_dimensions = 13C
F2_dimensions = 13C
F3_dimensions = 13C
F4_dimensions = 13C
F5_dimensions = 13C
F6_dimensions = 13C
F7_dimensions = 13C
F8_dimensions = 13C
F9_dimensions = 13C
F10_dimensions = 13C
F11_dimensions = 13C
F12_dimensions = 13C
F13_dimensions = 13C
F14_dimensions = 13C
F15_dimensions = 13C
F16_dimensions = 13C
F17_dimensions = 13C
F18_dimensions = 13C
F19_dimensions = 13C
F20_dimensions = 13C
F21_dimensions = 13C
F22_dimensions = 13C
F23_dimensions = 13C
F24_dimensions = 13C
F25_dimensions = 13C
F26_dimensions = 13C
F27_dimensions = 13C
F28_dimensions = 13C
F29_dimensions = 13C
F30_dimensions = 13C
F31_dimensions = 13C
F32_dimensions = 13C
F33_dimensions = 13C
F34_dimensions = 13C
F35_dimensions = 13C
F36_dimensions = 13C
F37_dimensions = 13C
F38_dimensions = 13C
F39_dimensions = 13C
F40_dimensions = 13C
F41_dimensions = 13C
F42_dimensions = 13C
F43_dimensions = 13C
F44_dimensions = 13C
F45_dimensions = 13C
F46_dimensions = 13C
F47_dimensions = 13C
F48_dimensions = 13C
F49_dimensions = 13C
F50_dimensions = 13C
F51_dimensions = 13C
F52_dimensions = 13C
F53_dimensions = 13C
F54_dimensions = 13C
F55_dimensions = 13C
F56_dimensions = 13C
F57_dimensions = 13C
F58_dimensions = 13C
F59_dimensions = 13C
F60_dimensions = 13C
F61_dimensions = 13C
F62_dimensions = 13C
F63_dimensions = 13C
F64_dimensions = 13C
F65_dimensions = 13C
F66_dimensions = 13C
F67_dimensions = 13C
F68_dimensions = 13C
F69_dimensions = 13C
F70_dimensions = 13C
F71_dimensions = 13C
F72_dimensions = 13C
F73_dimensions = 13C
F74_dimensions = 13C
F75_dimensions = 13C
F76_dimensions = 13C
F77_dimensions = 13C
F78_dimensions = 13C
F79_dimensions = 13C
F80_dimensions = 13C
F81_dimensions = 13C
F82_dimensions = 13C
F83_dimensions = 13C
F84_dimensions = 13C
F85_dimensions = 13C
F86_dimensions = 13C
F87_dimensions = 13C
F88_dimensions = 13C
F89_dimensions = 13C
F90_dimensions = 13C
F91_dimensions = 13C
F92_dimensions = 13C
F93_dimensions = 13C
F94_dimensions = 13C
F95_dimensions = 13C
F96_dimensions = 13C
F97_dimensions = 13C
F98_dimensions = 13C
F99_dimensions = 13C
F100_dimensions = 13C
Spectrometer = DELTA2_NMR
Field_strength = 9.389766[1] (400[MHz])
X_nucleation = 1.04333312[s]
X_domain = 13C
X_freq = 100.52530333[MHz]
X_offset = 100[ppm]
X_points = 32768
X_resolution = 0.9584665[Hz]
X_sweep = 31.40703518[kHz]
Irr_domain = 1H
Irr_freq = 399.78219838[MHz]
Irr_offset = 1[ppm]
Mod_return = 1
Modulus = 1
Total_scans = 1200
X_00_width = 9.4[us]
X_acq_time = 1.04333312[s]
X_angle = 45[deg]
X_atn = 7.8[db]
X_pulse = 4.7[us]
Irr_atn_dec = 21.4[db]
Irr_noise = 21.4[db]
Irr_noise_db = MALZ
Decoupling = TRUE
Initial_wait = 1[s]
Noe = TRUE
Poc_time = 50[s]
Relaxation_delay = 2[s]
Relaxation_time = 3.04333312[s]
Repetition_time = 24.1[dc]
Temp_get =
    
```

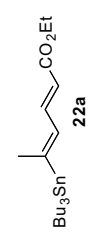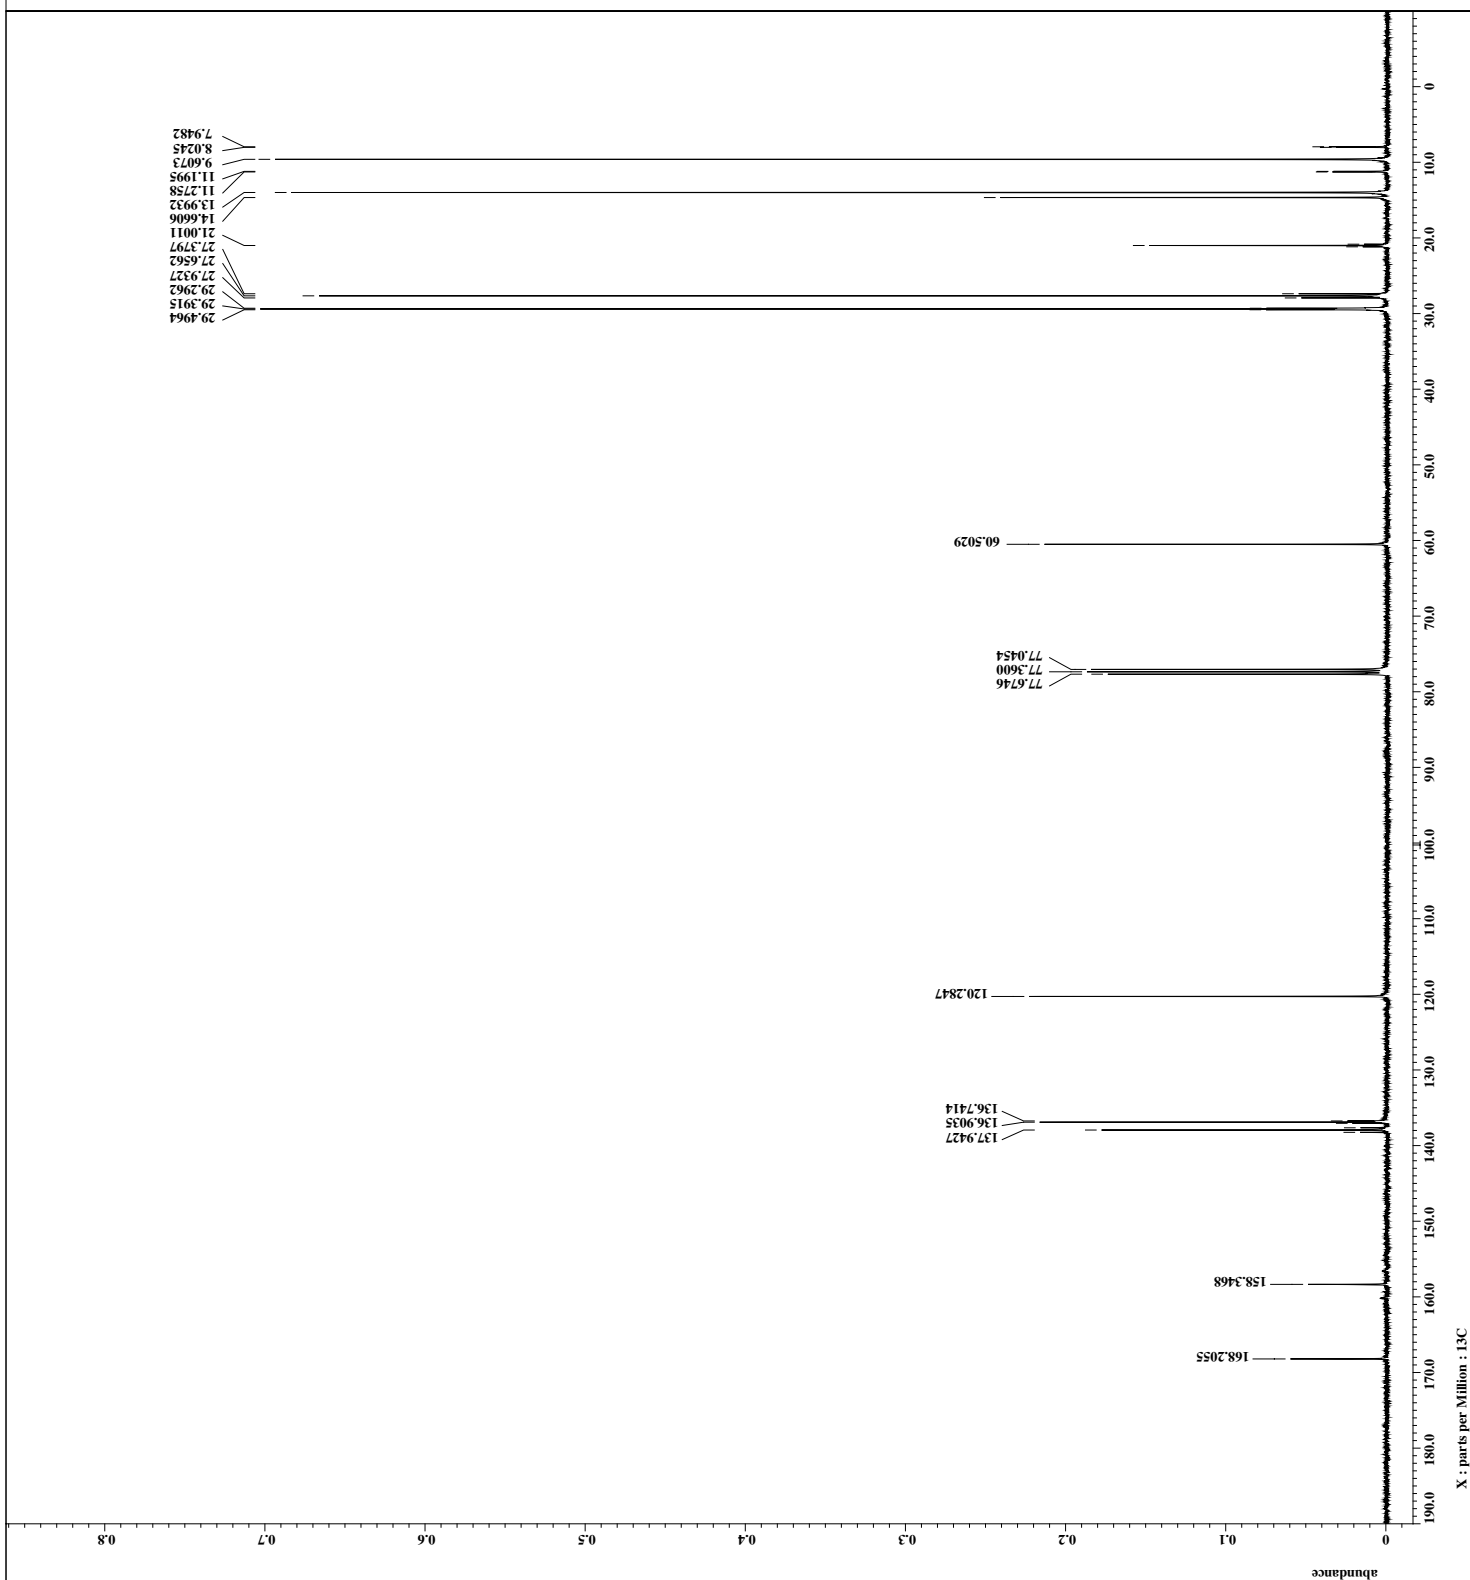

```

Filename = ci-tin-alcohol-1H-2-j
Author = delta
Experiment = 1
Acq_pulse = ex2
Sample_id = CHLOROFORM-D
Solvent = CHLOROFORM-D
Creation_time = 31-JUL-2006 16:06:37
Revision_time = 30-OCT-2008 11:10:11
Current_time = 30-OCT-2008 11:10:41
Comment = single pulse
Data_format = 1D COMPLEX
Dim_size = 26214
Dim_title = 1H
File_name = X
Integrator = X
Ppm = X
Dimensions = X
Site = ECK400M
Spectrometer = DELTA2_WMR
Field_strength = 9.369766 [T] (400 [MHz])
X_acq_time = 4.36731904 [s]
X_domain = 1H
X_freq = 399.78219838 [MHz]
X_offset = 4 [ppm]
X_points = 32768
X_resolution = 0.22897343 [Hz]
X_sweep = 7.5030012 [kHz]
Irr_domain = 1H
Irr_freq = 399.78219838 [MHz]
Irr_offset = 11 [ppm]
Mod_return = 1
Ppm = X
Tri_freq = 399.78219838 [MHz]
Tri_offset = 5 [ppm]
Clipped = FALSE
Mod_return = 1
Scans = 8
Total_scans = 8
X_90_width = 12 [us]
X_acq_time = 4.36731904 [s]
X_angle = 45 [deg]
X_resolution = 6 [ppm]
X_pulse = 6 [us]
Irr_mode = Off
Irr_mode = Off
Dante_preset = FALSE
Relax_wait = 2 [s]
Relaxation_delay = 5 [s]
Repetition_time = 9.36731904 [s]
Temp_get = 23.1 [dc]
    
```

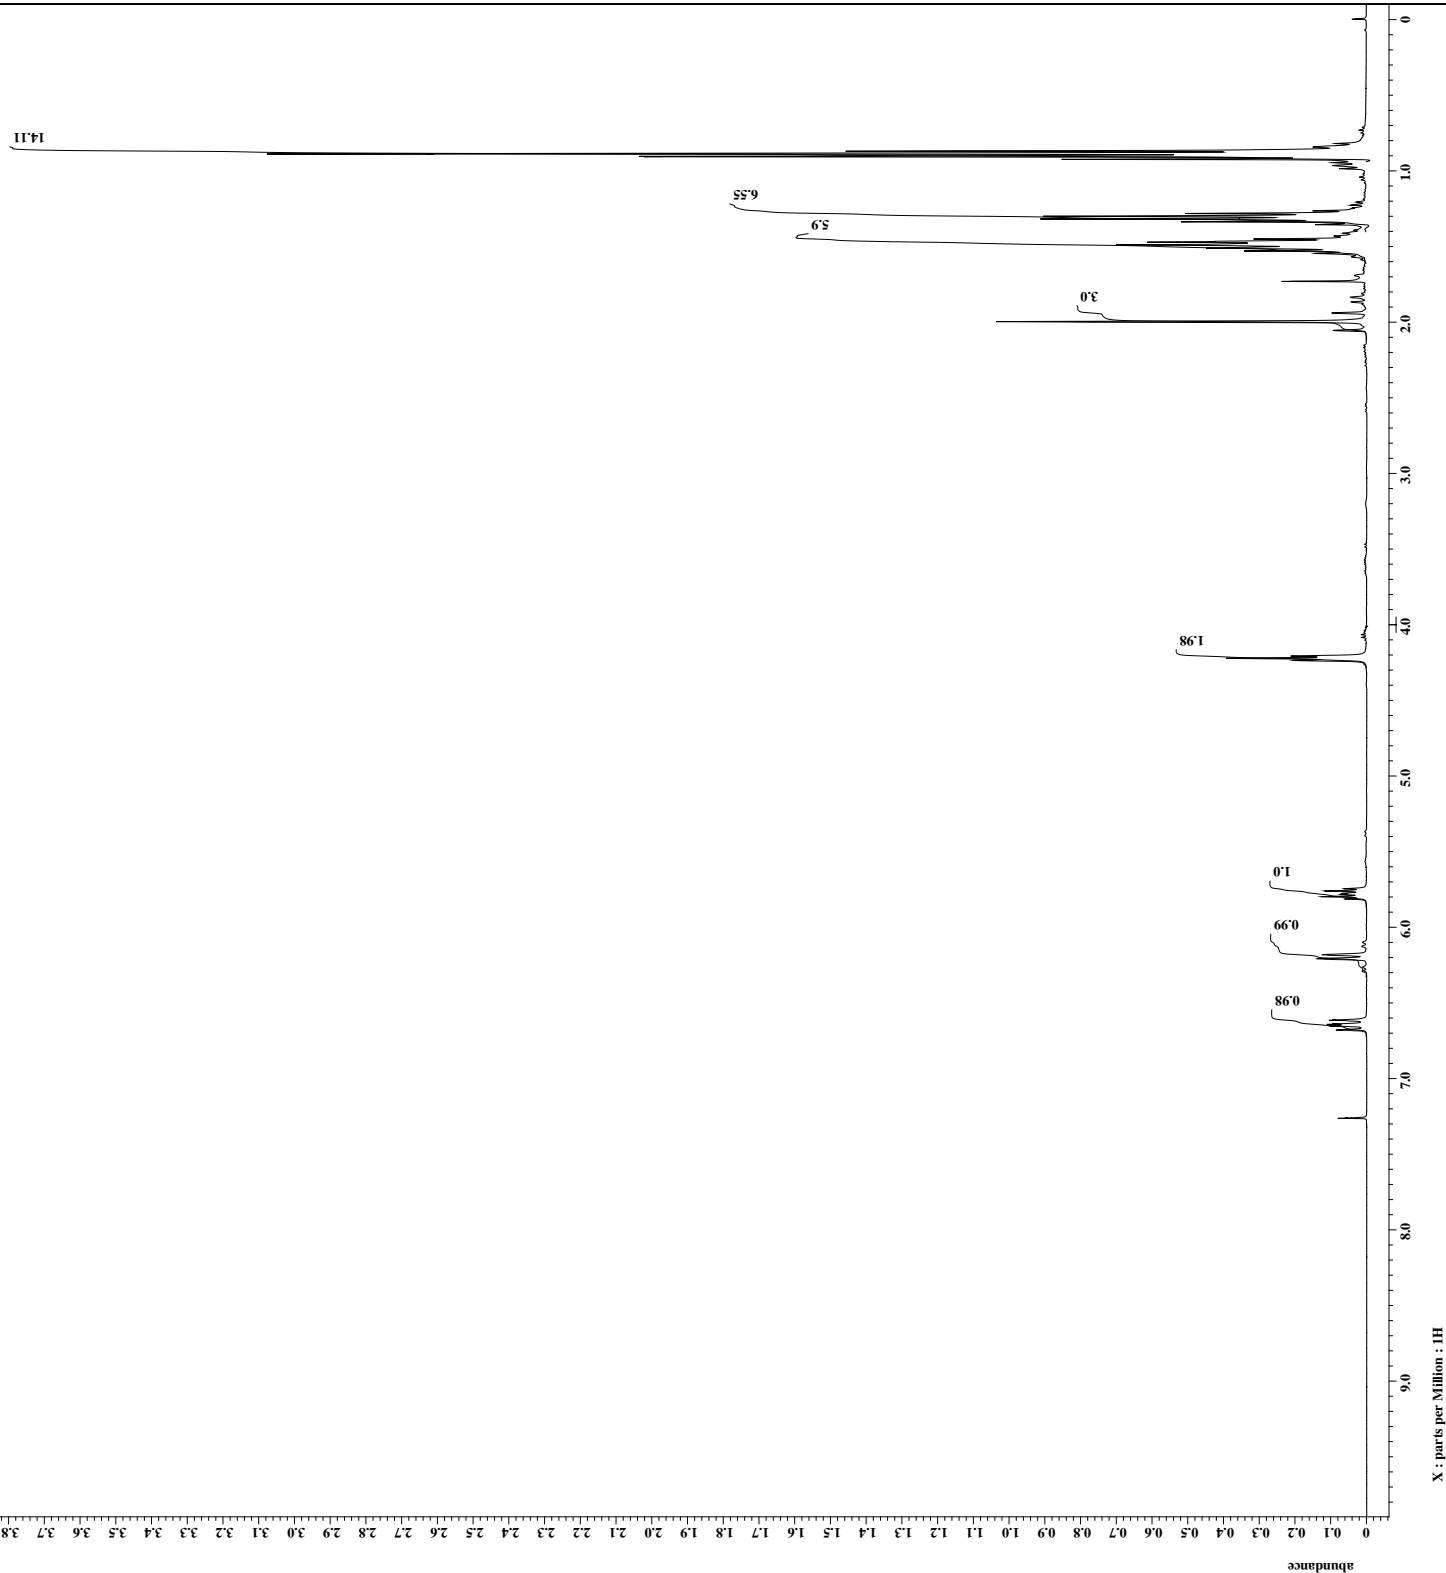

```

Filename = ci-tin-alcohol-13c-2.
Author = delta
Experiment = 1
Sample_id = 1
Solvent = CHLOROFORM-D
Creation_time = 31-JUL-2006 17:09:50
Revision_time = 29-OCT-2008 17:25:55
Current_time = 29-OCT-2008 17:26:34
Comment = single pulse decouple
Data_format = 1D COMPLEX
Dim_size = 26214
Dim_title = 13C
File_name = 13c
Dimensions = X
Site = ECK400M
Spectrometer = DELTA2_WMR
Field_strength = 9.389765[T] (400[MHz])
X_nucleation = 1.0433312[s]
X_freq = 13C
X_offset = 100.5253033[MHz]
X_points = 100[ppm]
X_resolution = 32768
X_sweep = 0.9584665[Hz]
X_resolution = 31.40703518[kHz]
Irr_domain = 1H
Irr_freq = 399.78219838[MHz]
Irr_offset = 51[ppm]
Mod_return = 1
Total_scans = 1200
X90_width = 9.4[us]
X_acq_time = 1.0433312[s]
X_angle = 45[deg]
X_atn = 7.8[db]
X_pulse = 4.7[us]
Irr_atn_dec = 21.4[db]
Irr_noise = MALZS[db]
Decoupling = TRUE
Initial_wait = 1[s]
Noe = TRUE
Rec_time = 5[s]
Relaxation_delay = 2[s]
Repetition_time = 3.0433312[s]
Temp_get = 23.4[degC]
    
```

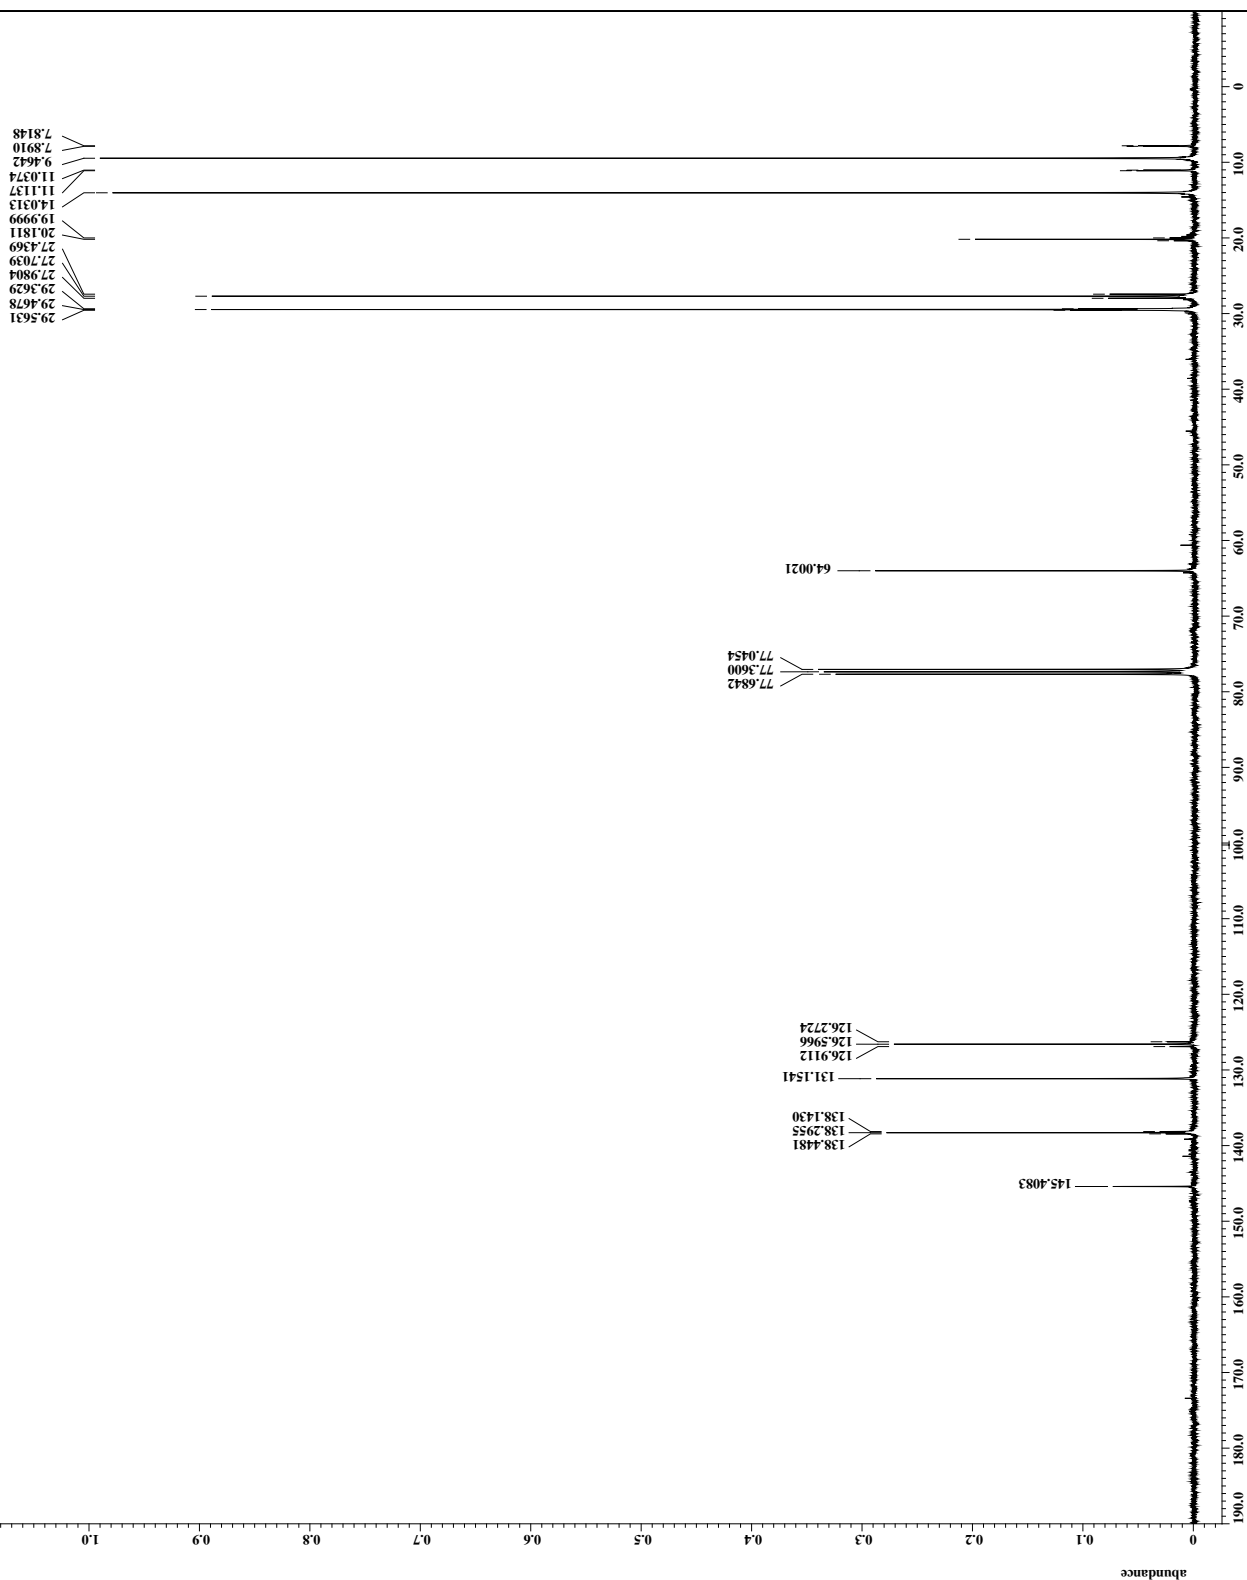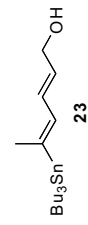

```

Filename = ci-triene-alcohol-1H-
Author = delta
Experiment = 1
Sample_id = 1
Solvent = CHLOROFORM-D
Creation_time = 20-SEP-2006 21:22:54
Revision_time = 30-OCT-2008 13:35:33
Current_time = 30-OCT-2008 13:35:47
Comment = single pulse
Data_format = 1D COMPLEX
Dim_size = 26214
Dim_title = 1H
F2 = 400.136340 [ppm]
Dimensions = X
Site = ECK400M
Spectrometer = DELTA2_NMR
Field_strength = 9.369766 [T] (400 [MHz])
X_acquisition = 4.36731904 [s]
X_domain = 1H
X_freq = 399.78219838 [MHz]
X_offset = 4 [ppm]
X_points = 32768
X_resolution = 0.22887343 [Hz]
X_sweep = 7.5030012 [kHz]
IRF_domain = 1H
IRF_freq = 399.78219838 [MHz]
IRF_offset = 1 [ppm]
IRF_resolution = 0.22887343 [Hz]
IRF_sweep = 7.5030012 [kHz]
Mod_return = FALSE
Total_scans = 8
X_90_width = 11.2 [us]
X_acq_time = 4.36731904 [s]
X_angle = 45 [deg]
X_delay = 5.0 [us]
X_pulse = 5.6 [us]
IRF_mode = Off
IRF_modulation = Off
Dante_preset = FALSE
Relaxation_wait = 30 [s]
Relaxation_delay = 5 [s]
Repetition_time = 9.36731904 [s]
Temp_get = 25.3 [dC]
    
```

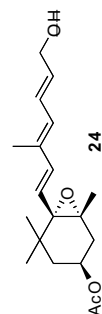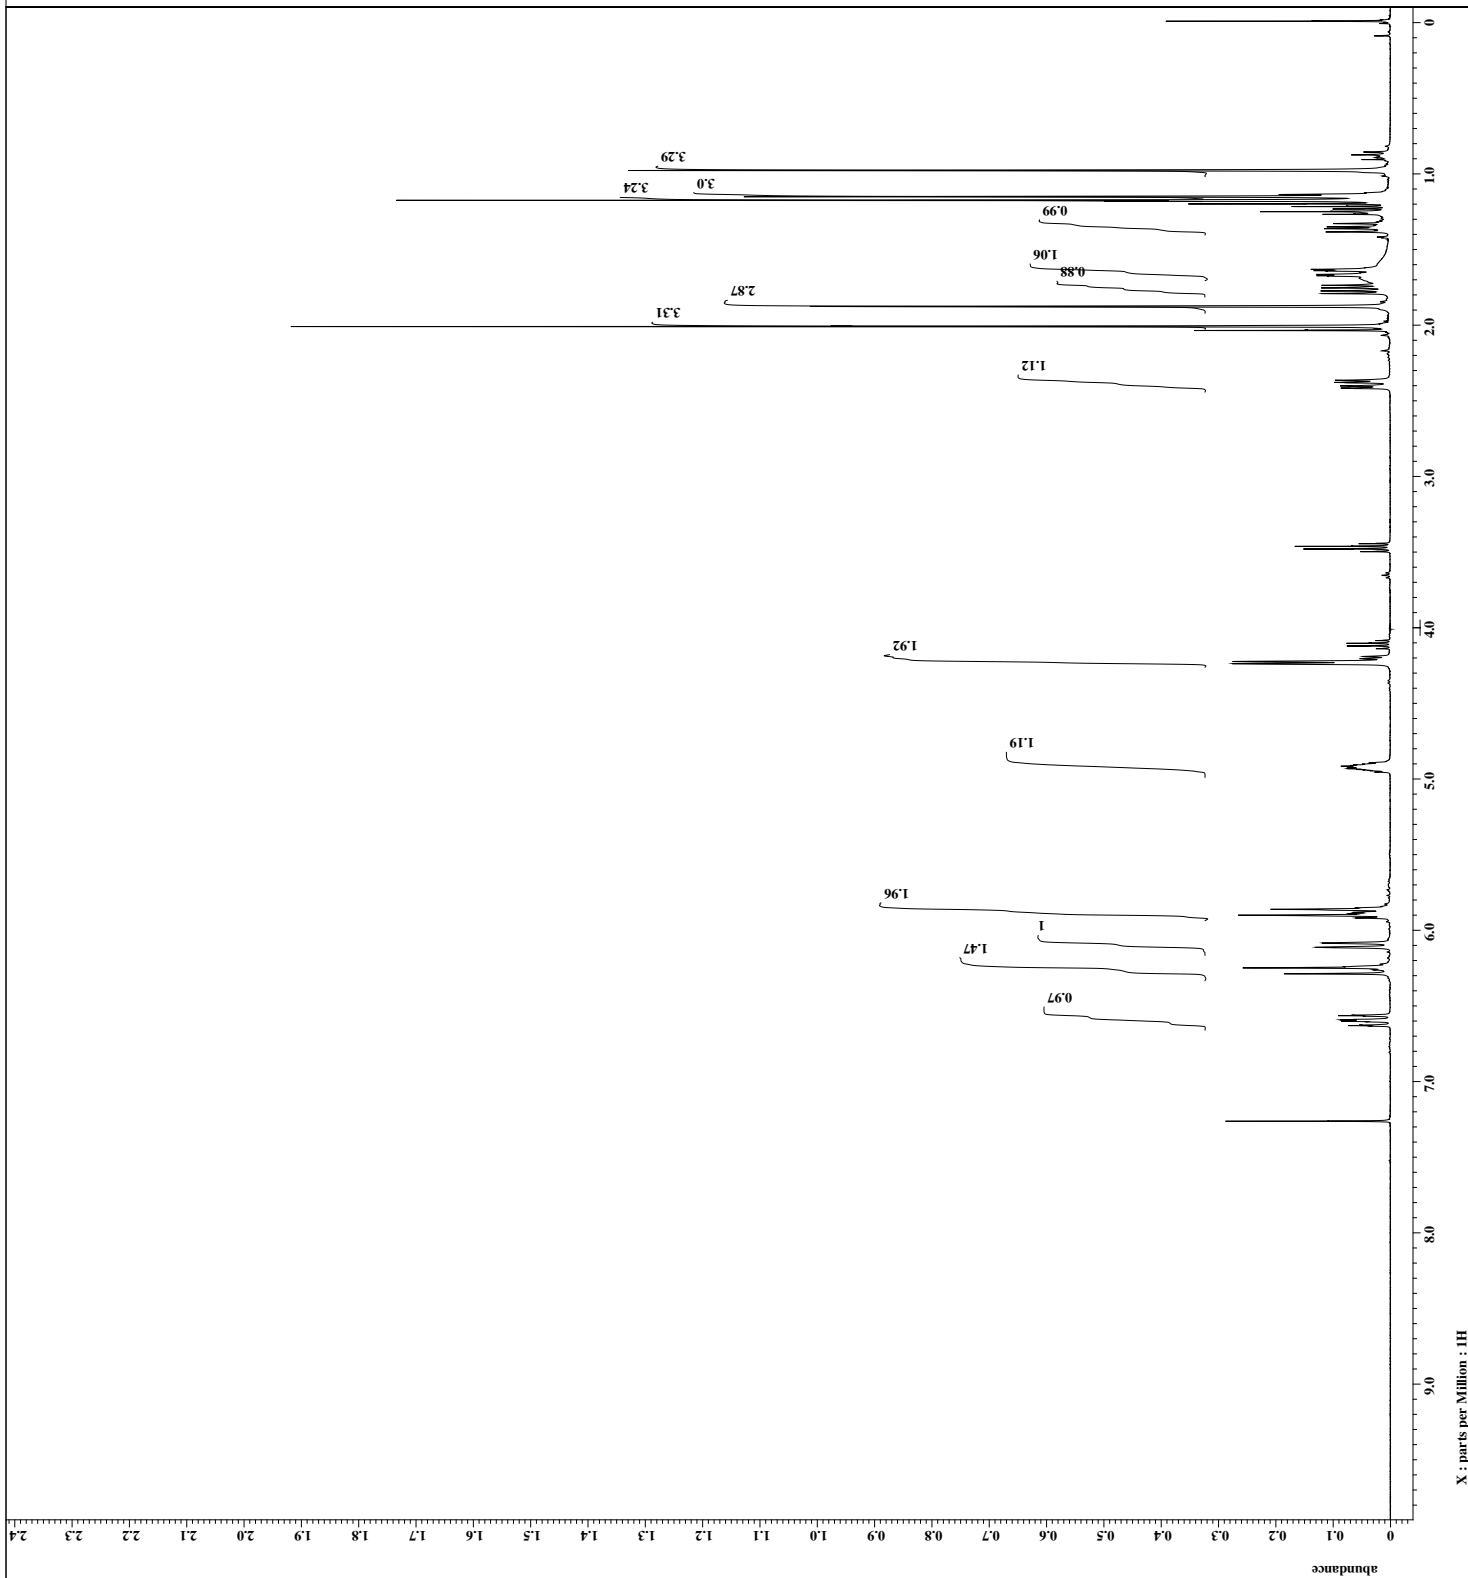

X : parts per Million : 1H



```

Filename = ci-triene-alcohol-13C
Author = delta
Experiment = 1
Angle_pulse_dec = 1
Sample_id = CHLOROFORM-D
Solvent = CHLOROFORM-D
Creation_time = 20-SEP-2006 22:17:11
Revision_time = 29-OCT-2008 17:27:47
Current_time = 29-OCT-2008 17:28:13
Comment = single pulse decouple
Data_format = 1D COMPLEX
Dim_size = 26214
Dim_title = 13C
F2 = 13C
F3 = 13C
Dimensions = 1
Site = ECX400M
Spectrometer = DELTA2_NMR
Field_strength = 9.389766[T] (400[MHz])
X_nuq = 1.04333312[s]
X_domain = 13C
X_freq = 100.52530333[MHz]
X_offset = 100[ppm]
X_points = 32768
X_resolution = 0.95846665[Hz]
X_sweep = 31.40703518[kHz]
IR_domain = 1H
IR_freq = 399.78219838[MHz]
IR_offset = 5[ppm]
Mod_return = 1
Total_scans = 1014
X_90_width = 9.6[us]
X_acq_time = 1.04333312[s]
X_angle = 45[deg]
X_atn = 7.8[db]
X_pulse = 4.8[us]
IR_atn_dec = 21.4[db]
IR_noise = MALZ
Decoupling = TRUE
Initial_wait = 1[s]
Noe = TRUE
Rec_time = 5[s]
Relaxation_delay = 2[s]
Repetition_time = 3.04333312[s]
Temp_get = 25.4[deg]
    
```

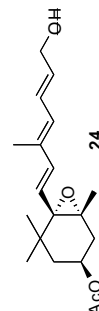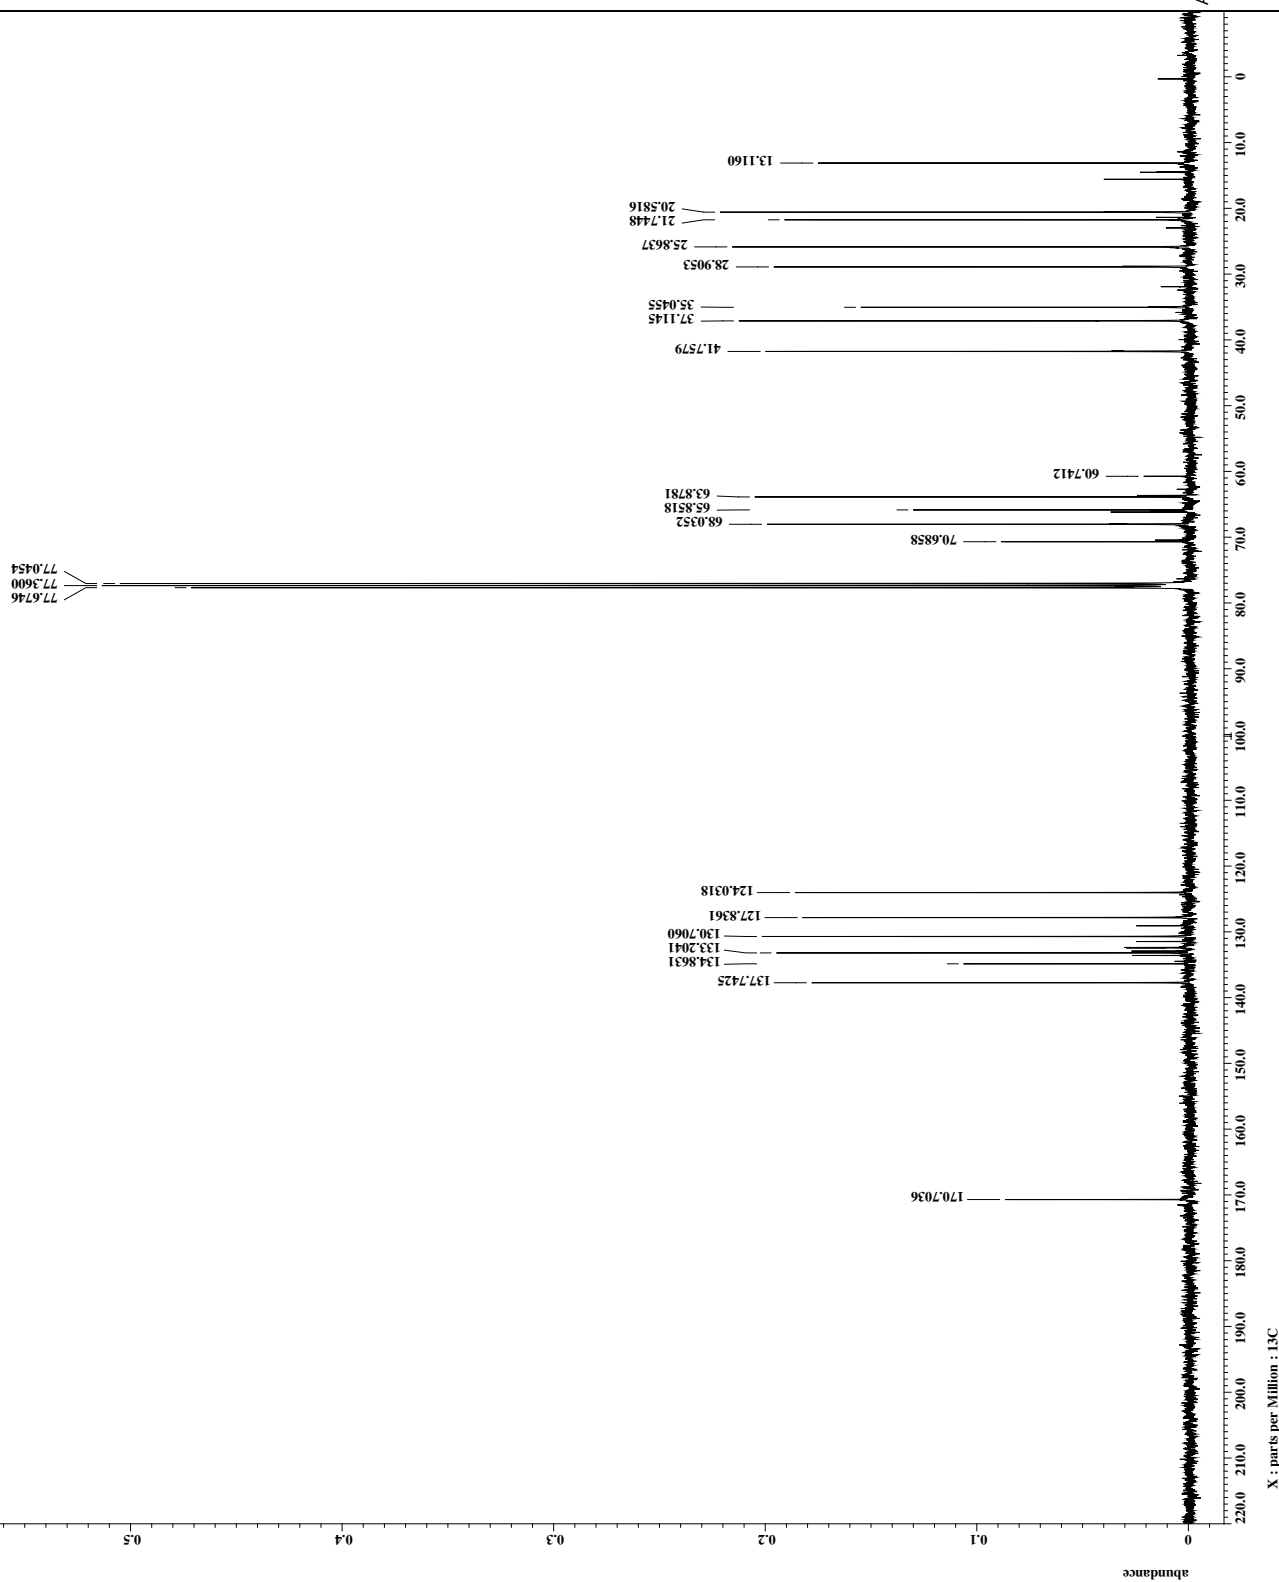

```

Filename = cl-sulfide-1R-2-j4f
Author = delta
Experiment = 1
Acq_date = 20081015
Sample_id = CHLOROFORM-D
Solvent = CHLOROFORM-D
Creation_time = 21-SEP-2006 17:47:23
Revision_time = 30-OCT-2008 10:15:46
Current_time = 30-OCT-2008 10:16:31
Comment = single pulse
Data_format = 1D COMPLEX
Dim_size = 26214
Dim_title = 1H
File_name = 1H
Dimensions = X
F1_freq = 400.1464000
Site = ECK400M
Spectrometer = DELTA2_WMR
Field_strength = 9.369766 [T] (400 [MHz])
X_acq_time = 4.36731904 [s]
X_domain = 1H
X_freq = 399.78219838 [MHz]
X_offset = 4 [ppm]
X_points = 32768
X_resolution = 0.22887343 [Hz]
X_sweep = 7.5030012 [kHz]
IRF_domain = 1H
IRF_freq = 399.78219838 [MHz]
IRF_offset = 1 [ppm]
IRF_points = 11
IRF_resolution = 0.22887343 [Hz]
IRF_sweep = 7.5030012 [kHz]
Mod_return = FALSE
Scans = 1
Total_scans = 8
X_90_width = 11.2 [us]
X_acq_time = 4.36731904 [s]
X_angle = 45 [deg]
X_delay = 5.0 [us]
X_pulse = 5.6 [us]
IRF_mode = Off
Dante_preset = FALSE
Relax_wait = 30 [s]
Relaxation_delay = 5 [s]
Repetition_time = 9.36731904 [s]
Temp_get = 25.1 [dc]
    
```

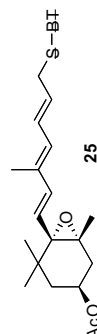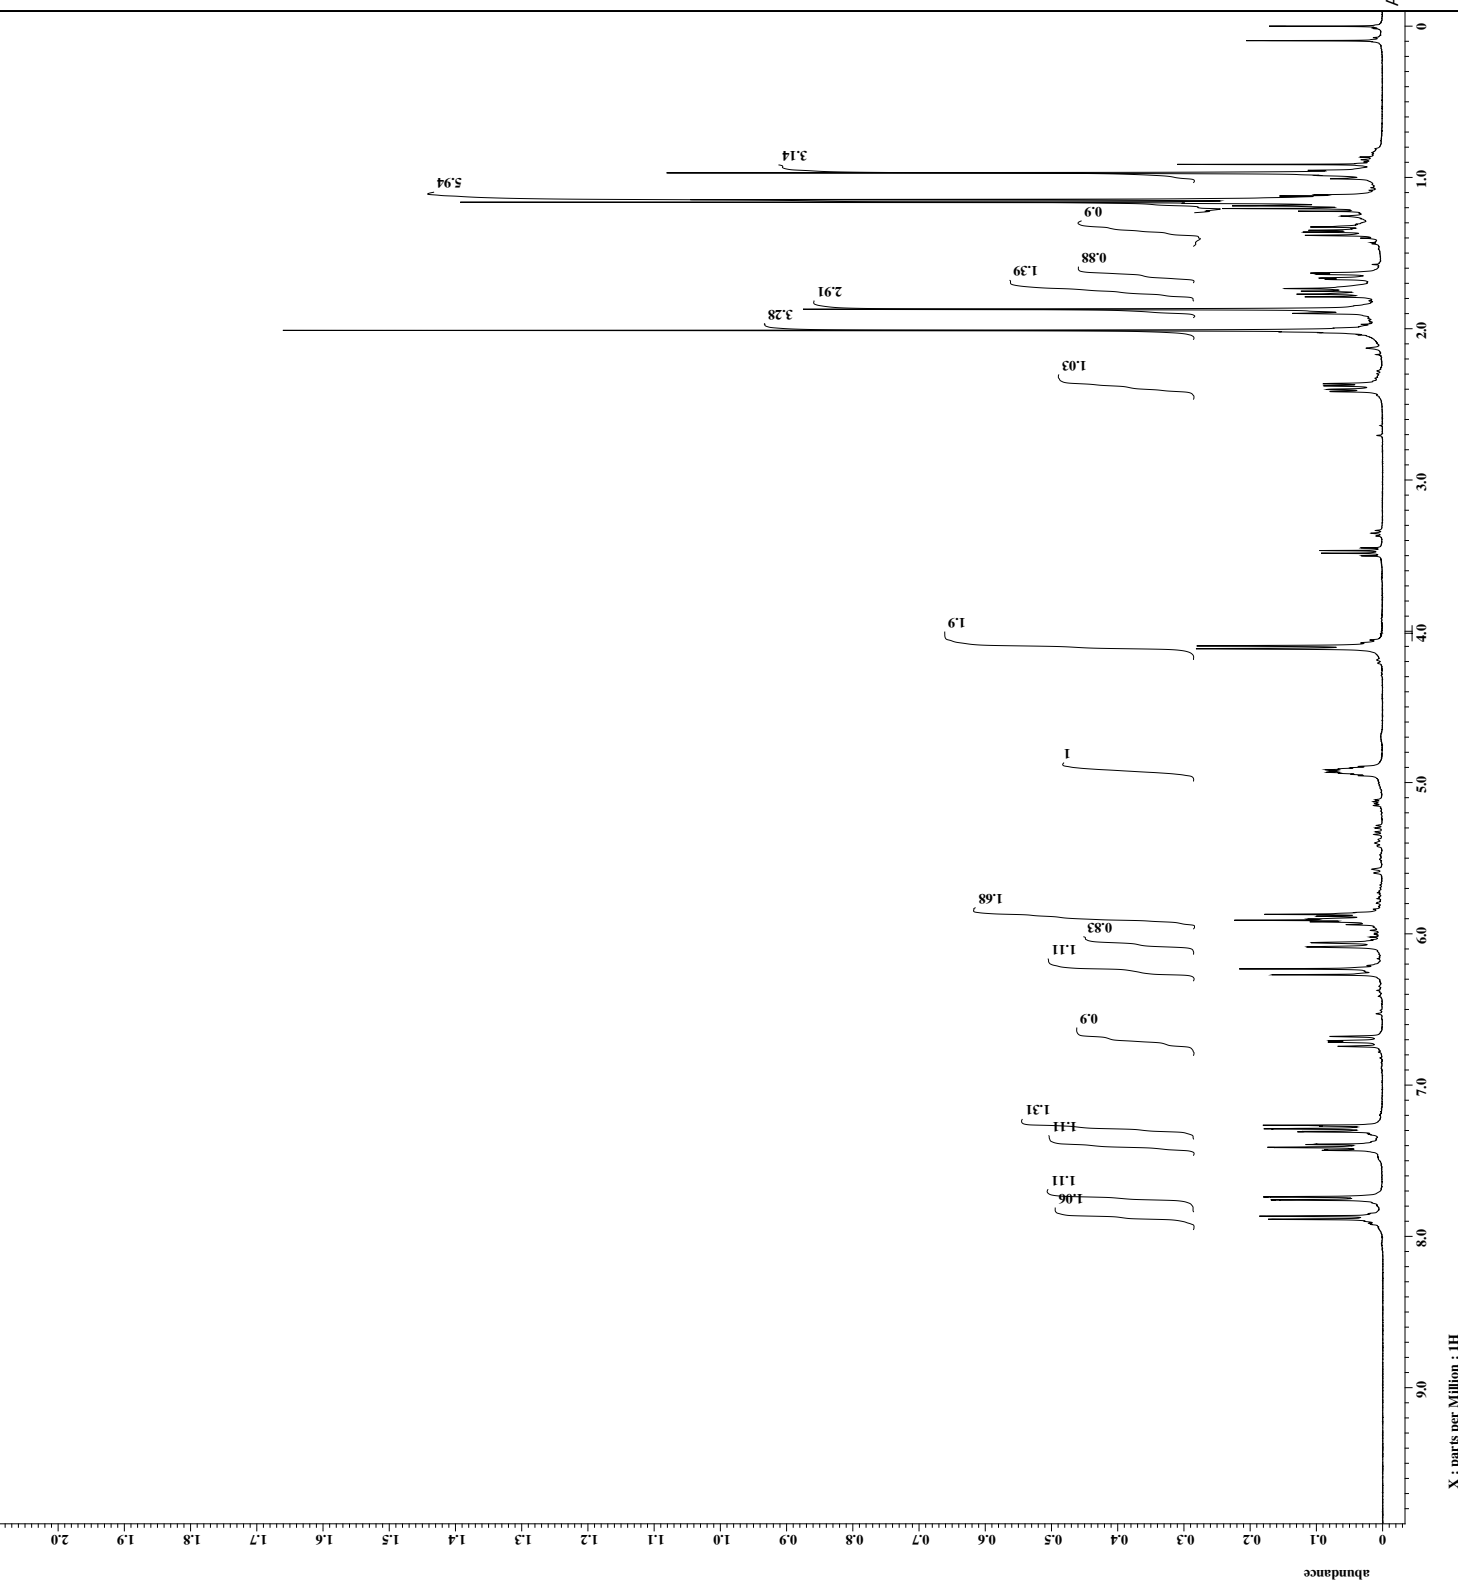

```

Filename = ci-sulfide-13c-3.jdf
Author = delta
Experiment = 1
Angle_pulse_dec = 1
Sample_id = CHLOROFORM-D
Solvent = CHLOROFORM-D
Creation_time = 21-SEP-2006 18:40:29
Revision_time = 29-OCT-2008 17:15:56
Current_time = 29-OCT-2008 17:16:25
Comment = single pulse decouple
Data_format = 1D COMPLEX
Dim_size = 26214
Dim_title = 13C
File_name = ci-sulfide-13c-3.jdf
Dimensions = 1
Ppm = X
Spectrum = ECK400M
Spectrometer = DELTA2_WMR
Field_strength = 9.389766[T] (400[MHz])
X_nucleation = 1.0433312[s]
X_domain = 13C
X_freq = 100.5253033[MHz]
X_offset = 100[ppm]
X_points = 32768
X_resolution = 0.9584665[Hz]
X_sweep = 31.40703518[kHz]
Irr_domain = 1H
Irr_freq = 399.78219838[MHz]
Irr_offset = 5[ppm]
Mod_return = 1
Scans = 1000
Total_scans = 1000
X_90_width = 9.6[us]
X_acq_time = 1.0433312[s]
X_angle = 45[deg]
X_atn = 7.8[db]
X_pulse = 4.8[us]
Irr_atn_dec = 21.4[db]
Irr_noise = MALZS[db]
Decoupling = TRUE
Initial_wait = 1[s]
Noe = TRUE
Rec_time = 5[s]
Relaxation_delay = 2[s]
Relaxation_time = 3.0433312[s]
Repetition_time = 25.6[dc]
Temp_get =
    
```

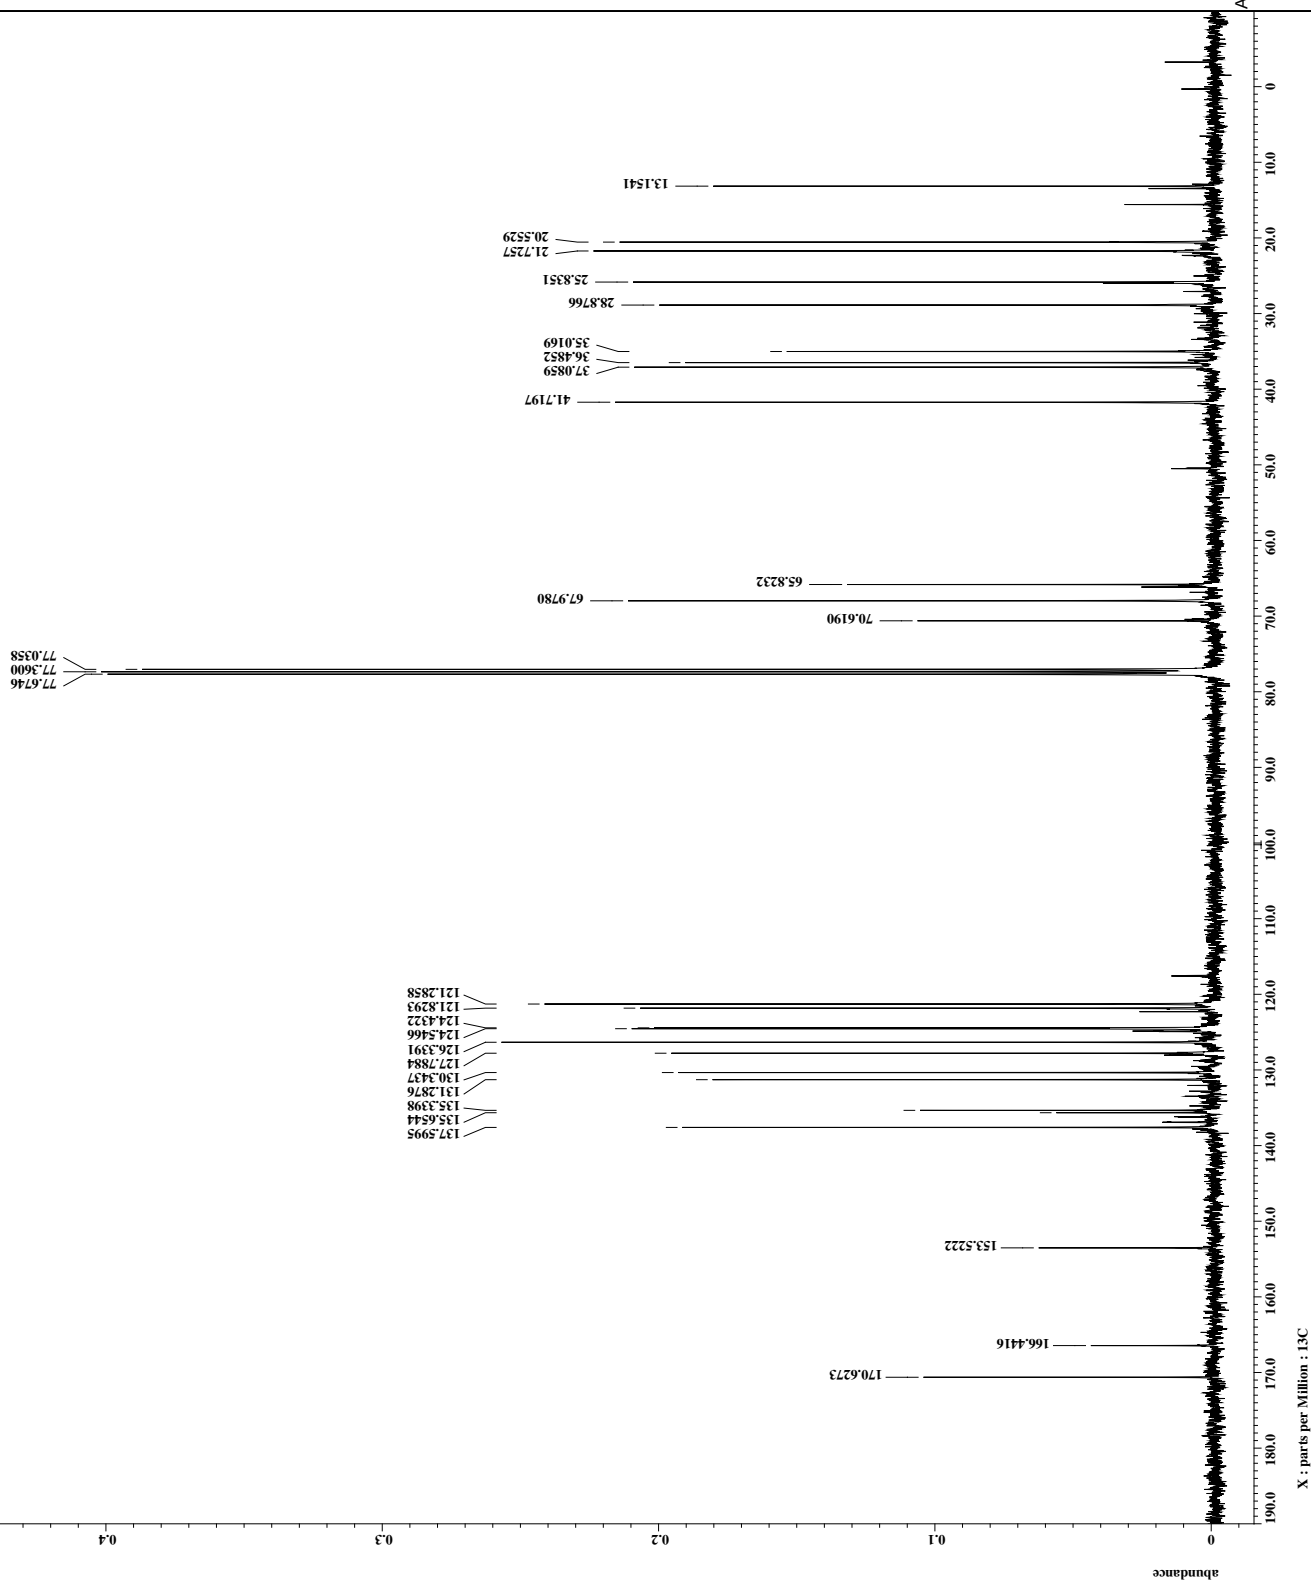

X : parts per Million : 13C

```

Filename = ci-sulfone-1R-2-j4f
Author = delta
Experiment = 1
Acq_date = 18-SEP-2008 11:36:42
Sample_id = CHLOROFORM-D
Solvent = CHLOROFORM-D
Creation_time = 30-OCT-2008 10:19:45
Revision_time = 30-OCT-2008 10:20:06
Current_time =
Comment = Katsamura lab.
Data_format = 1D COMPLEX
Dim_size = 13107
Dim_title = 1H
Dir = X
Dimensions = X
Site = ECX400M
Spectrometer = DELTA2_NMR
Field_strength = 9.389766 [T] (400 [MHz])
X_acq_time = 2.18365952 [s]
X_domain = 1H
X_freq = 399.78219838 [MHz]
X_offset = 4 [ppm]
X_points = 16384
X_resolution = 0.45794685 [Hz]
X_sweep = 7.5030012 [kHz]
IR_domain = 1H
IR_freq = 399.78219838 [MHz]
IR_offset = 11 [ppm]
IR_resolution = 11 [ppm]
IR1_freq = 399.78219838 [MHz]
IR1_offset = 5 [ppm]
Clipped = FALSE
Mod_return = 1
Scans = 8
Total_scans = 8
X_90_width = 10.45 [us]
X_acq_time = 2.18365952 [s]
X_angle = 45 [deg]
X_pulse = 5.225 [us]
IR1_mode = Off
IR1_mode = Off
Dante_preset = FALSE
Relax_wait = 3 [s]
Relaxation_delay = 1 [s]
Repetition_time = 3.18365952 [s]
Temp_get = 25.3 [degC]
    
```

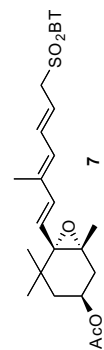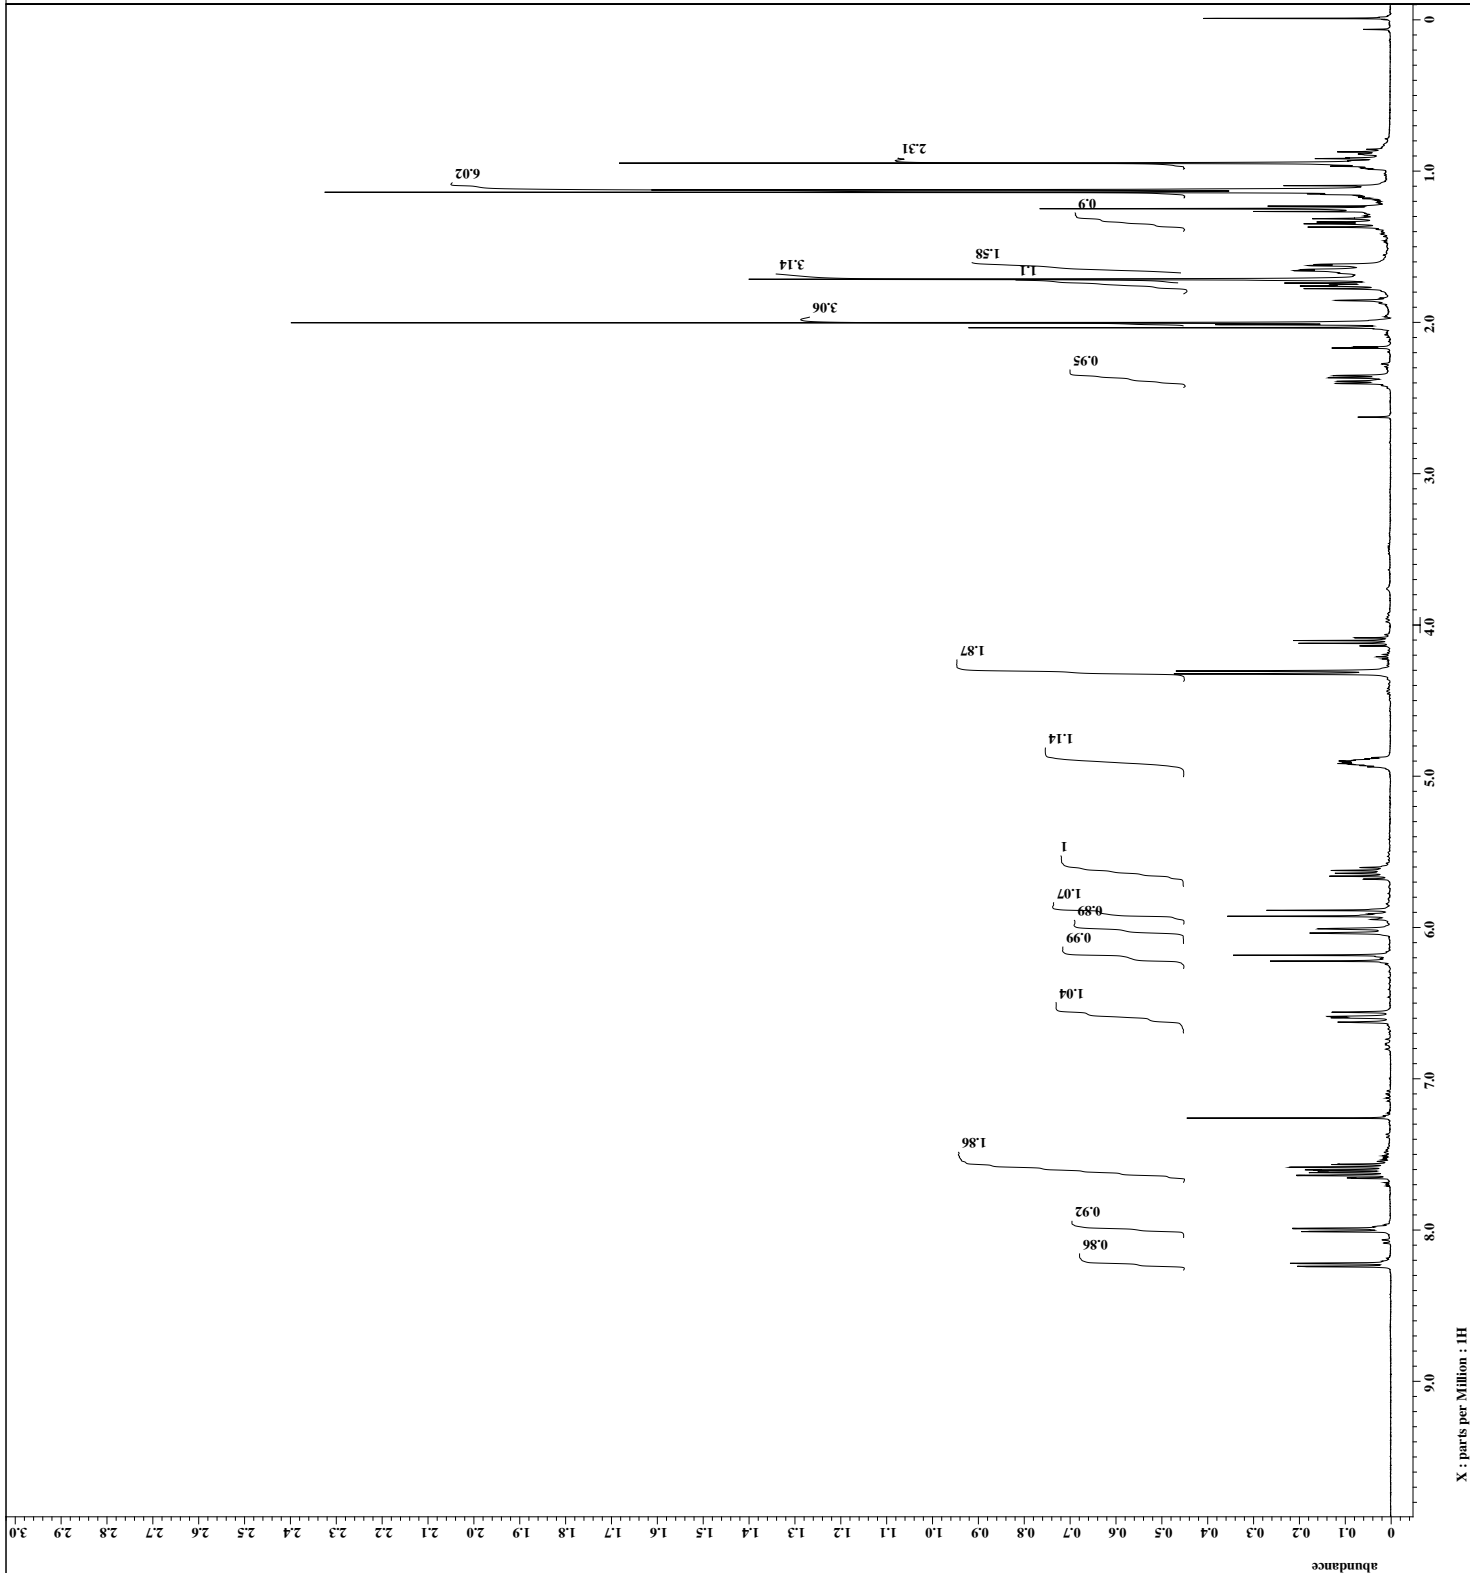

```

Filename = ci-sulfone-13C-4_3df
Author =
Experiment = delta_pulse_dec
Sample_id = S1437052
Solvent = CHLOROFORM-D
Creation_time = 18-SEP-2008 12:07:39
Revision_time = 29-OCT-2008 17:18:41
Current_time = 29-OCT-2008 17:19:06
Comment = single pulse decouple
Data_format = 1D COMPLEX
Dim_size = 26214
Dim_title = 13C
File_name = ci-sulfone-13C-4_3df
Dimensions = X(ppm)
Site = ECK400M
Spectrometer = DELTA2_WMR
Field_strength = 9.389766171 (400[MHz])
X_coordination = 1.04333121[s]
X_domain = 13C
X_freq = 100.52530333[MHz]
X_offset = 100[ppm]
X_points = 32768
X_resolution = 0.95846655[Hz]
X_sweep = 31.40703518[kHz]
Irr_domain = 1H
Irr_freq = 399.78219838[MHz]
Irr_offset = 51[ppm]
Modulation = TRUE
Mod_return = 1
Scans = 281
Total_scans = 281
X_90_width = 9.21[us]
X_acq_time = 1.04333121[s]
X_angle = 45[deg]
X_atn = 6.6[db]
X_pulse = 4.6[us]
Irr_atn_dec = 22[db]
Irr_noise [db] = MALZ
Decoupling = TRUE
Initial_wait = 1[s]
Noe = TRUE
Poc_time = 60[s]
Relaxation_delay = 5[s]
Repetition_time = 6.04333121[s]
Temp_get = 25.8[degC]
    
```

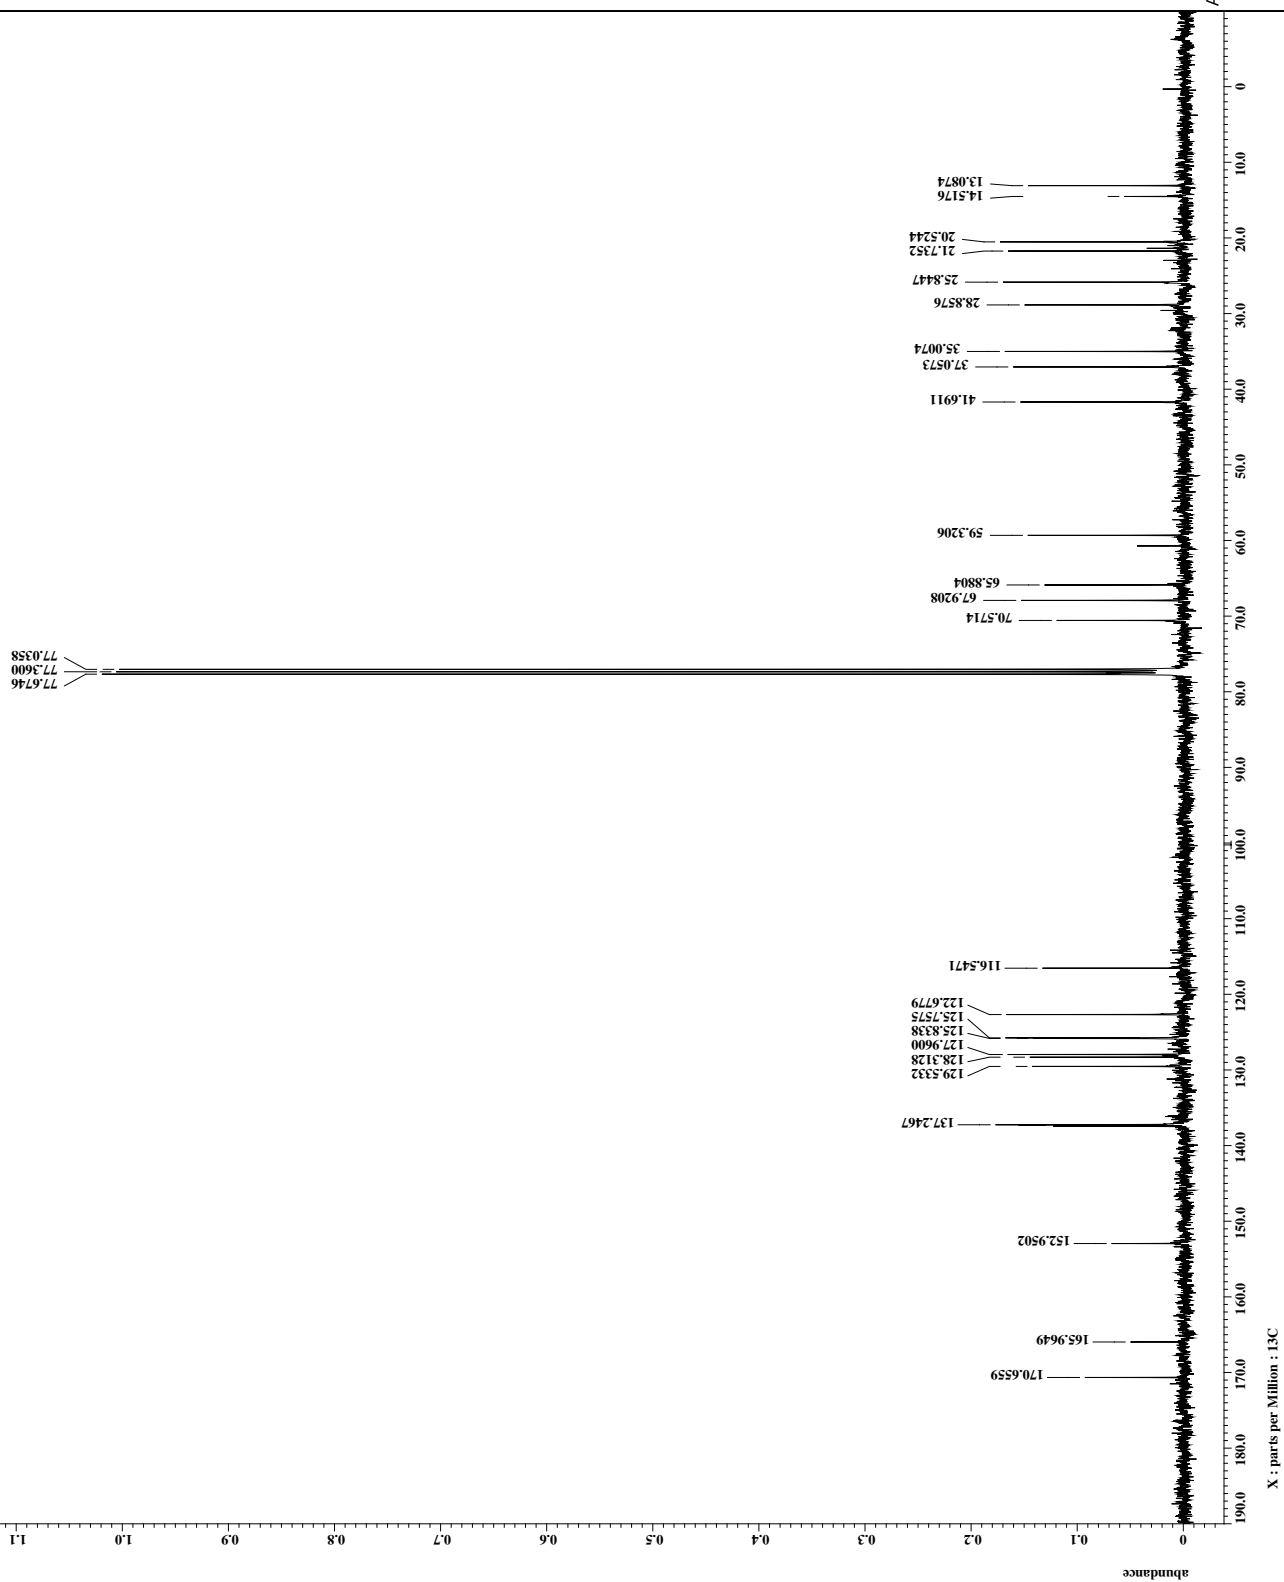

DFILE 1r  
COMNT katsum750\_13.1.1  
DATIM Thu Nov 6 10:05:29 2008  
ORNUC IH  
EXMOD zg30  
OBFRQ 750.13 MHz  
OBSET 3.60 KHz  
OBFIN 0.62 Hz  
POINT 32768  
FREQU 11261.26 Hz  
SCANS 16  
ACQTM 2.9098 sec  
PD 1.0000 sec  
PW1 10.15 usec  
IRNUC 26.9 c  
CTEMP C6D6  
SLVNT  
EXREF 7.16 ppm  
BF 0.30 Hz  
RGAIN 128

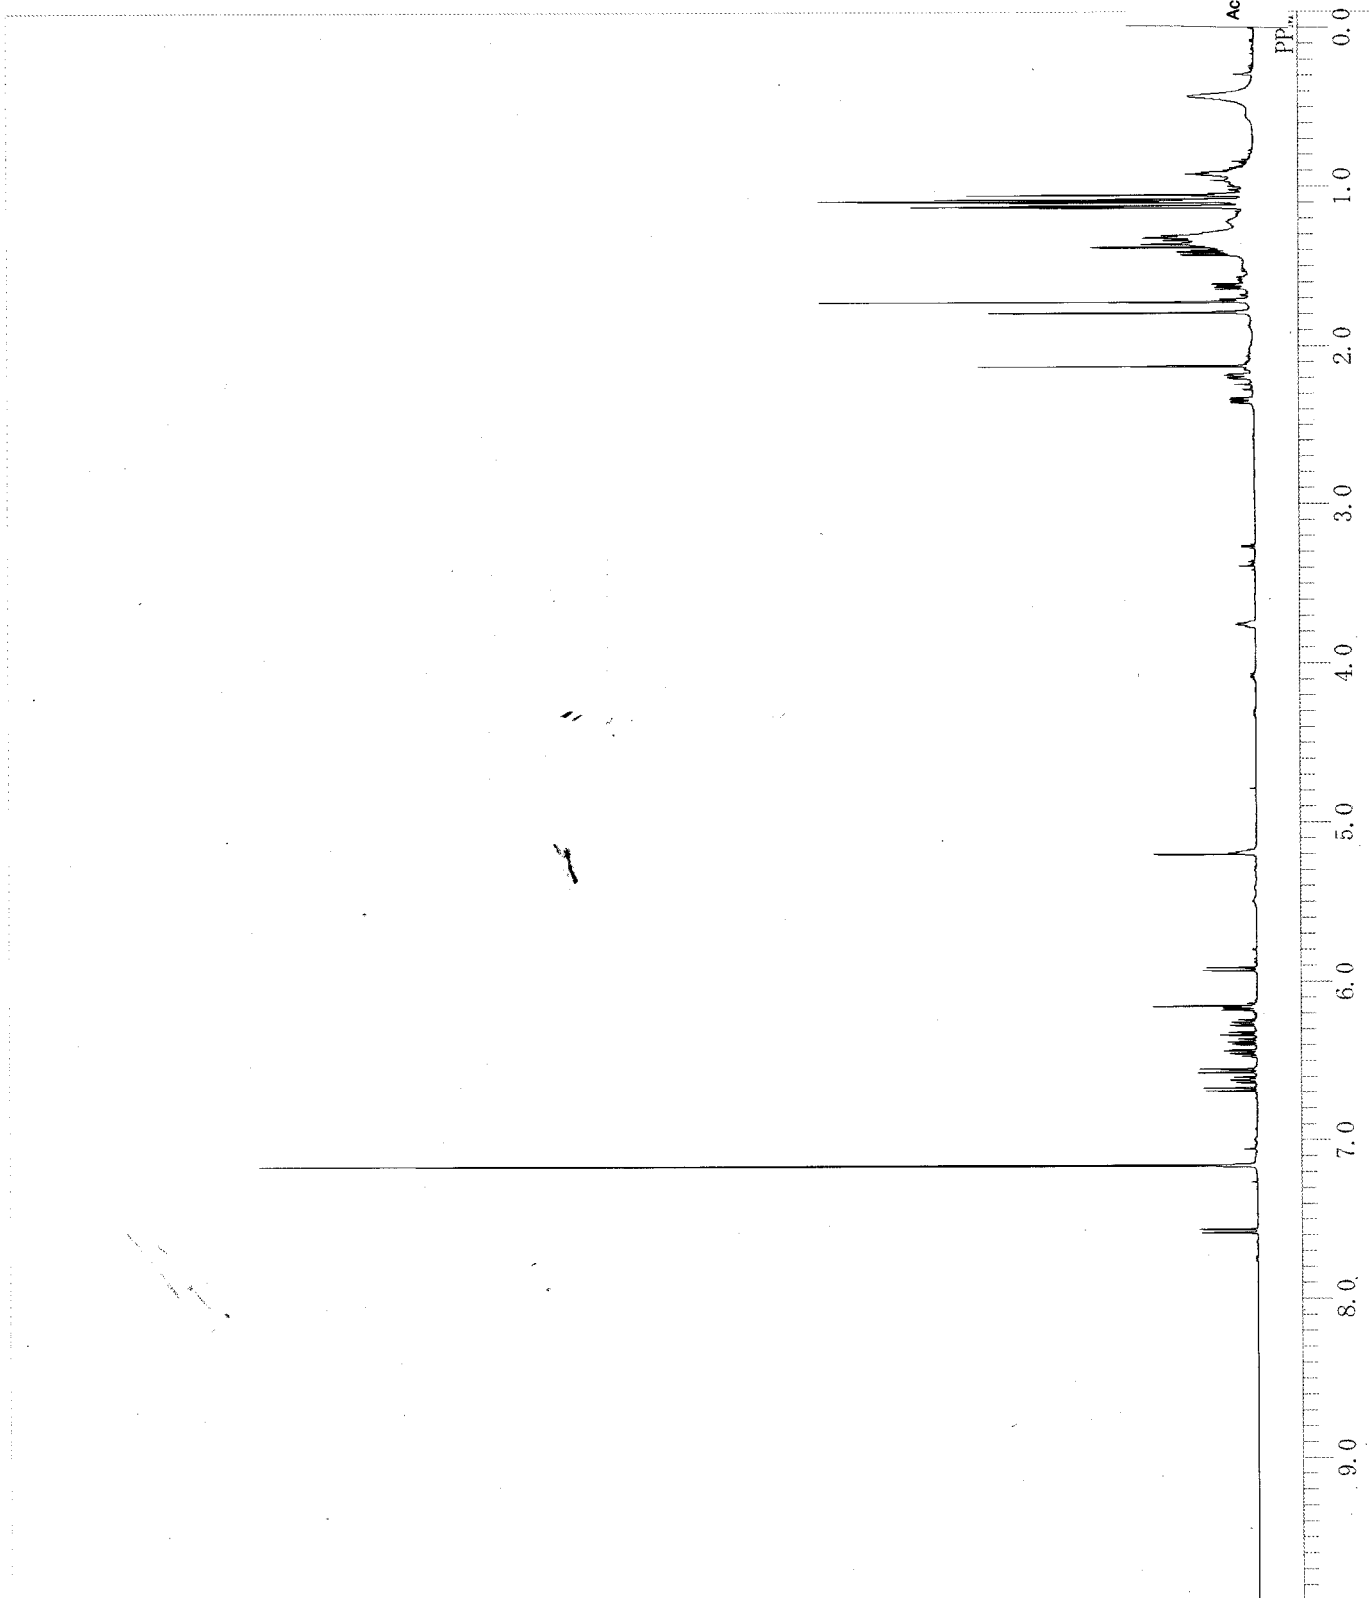



```

Filename = dl-triflate-alcohol-1
Author = delta
Experiment = 1
Acq_pulse = ex2
Sample_id = CHLOROFORM-D
Solvent = CHLOROFORM-D
Creation_time = 11-AUG-2008 13:27:28
Revision_time = 30-OCT-2008 17:13:44
Current_time = 30-OCT-2008 17:14:07
Comment = single pulse
Data_format = 1D COMPLEX
Dim_size = 13107
Dim_title = 1H
Dimensions = X [ppm]
Site = ECX400M
Spectrometer = DELTA2_NMR
Field_strength = 9.389766 [T] (400 [MHz])
X_nucleation = 2.18365952 [s]
X_domain = 1H
X_freq = 399.78219838 [MHz]
X_offset = 4 [ppm]
X_points = 16384
X_sweeps = 1
X_resolution = 0.45794685 [Hz]
X_sweep = 7.5030012 [kHz]
Irr_domain = 1H
Irr_freq = 399.78219838 [MHz]
Irr_offset = 1 [ppm]
Irr_points = 16384
Irr_sweeps = 1
Irr_resolution = 0.45794685 [Hz]
Irr_sweep = 7.5030012 [kHz]
Mod_return = FALSE
Scans = 1
Total_scans = 8
X_90_width = 10.45 [us]
X_acq_time = 2.18365952 [s]
X_angle = 45 [deg]
X_delay = 5.225 [us]
X_pulse = 5.225 [us]
Irr_mode = Off
Irr_mods = Off
Dante_preset = FALSE
Relax_wait = 3 [s]
Relaxation_delay = 1 [s]
Repetition_time = 3.18365952 [s]
Temp_get = 24.5 [dc]
    
```

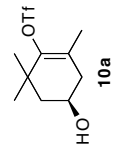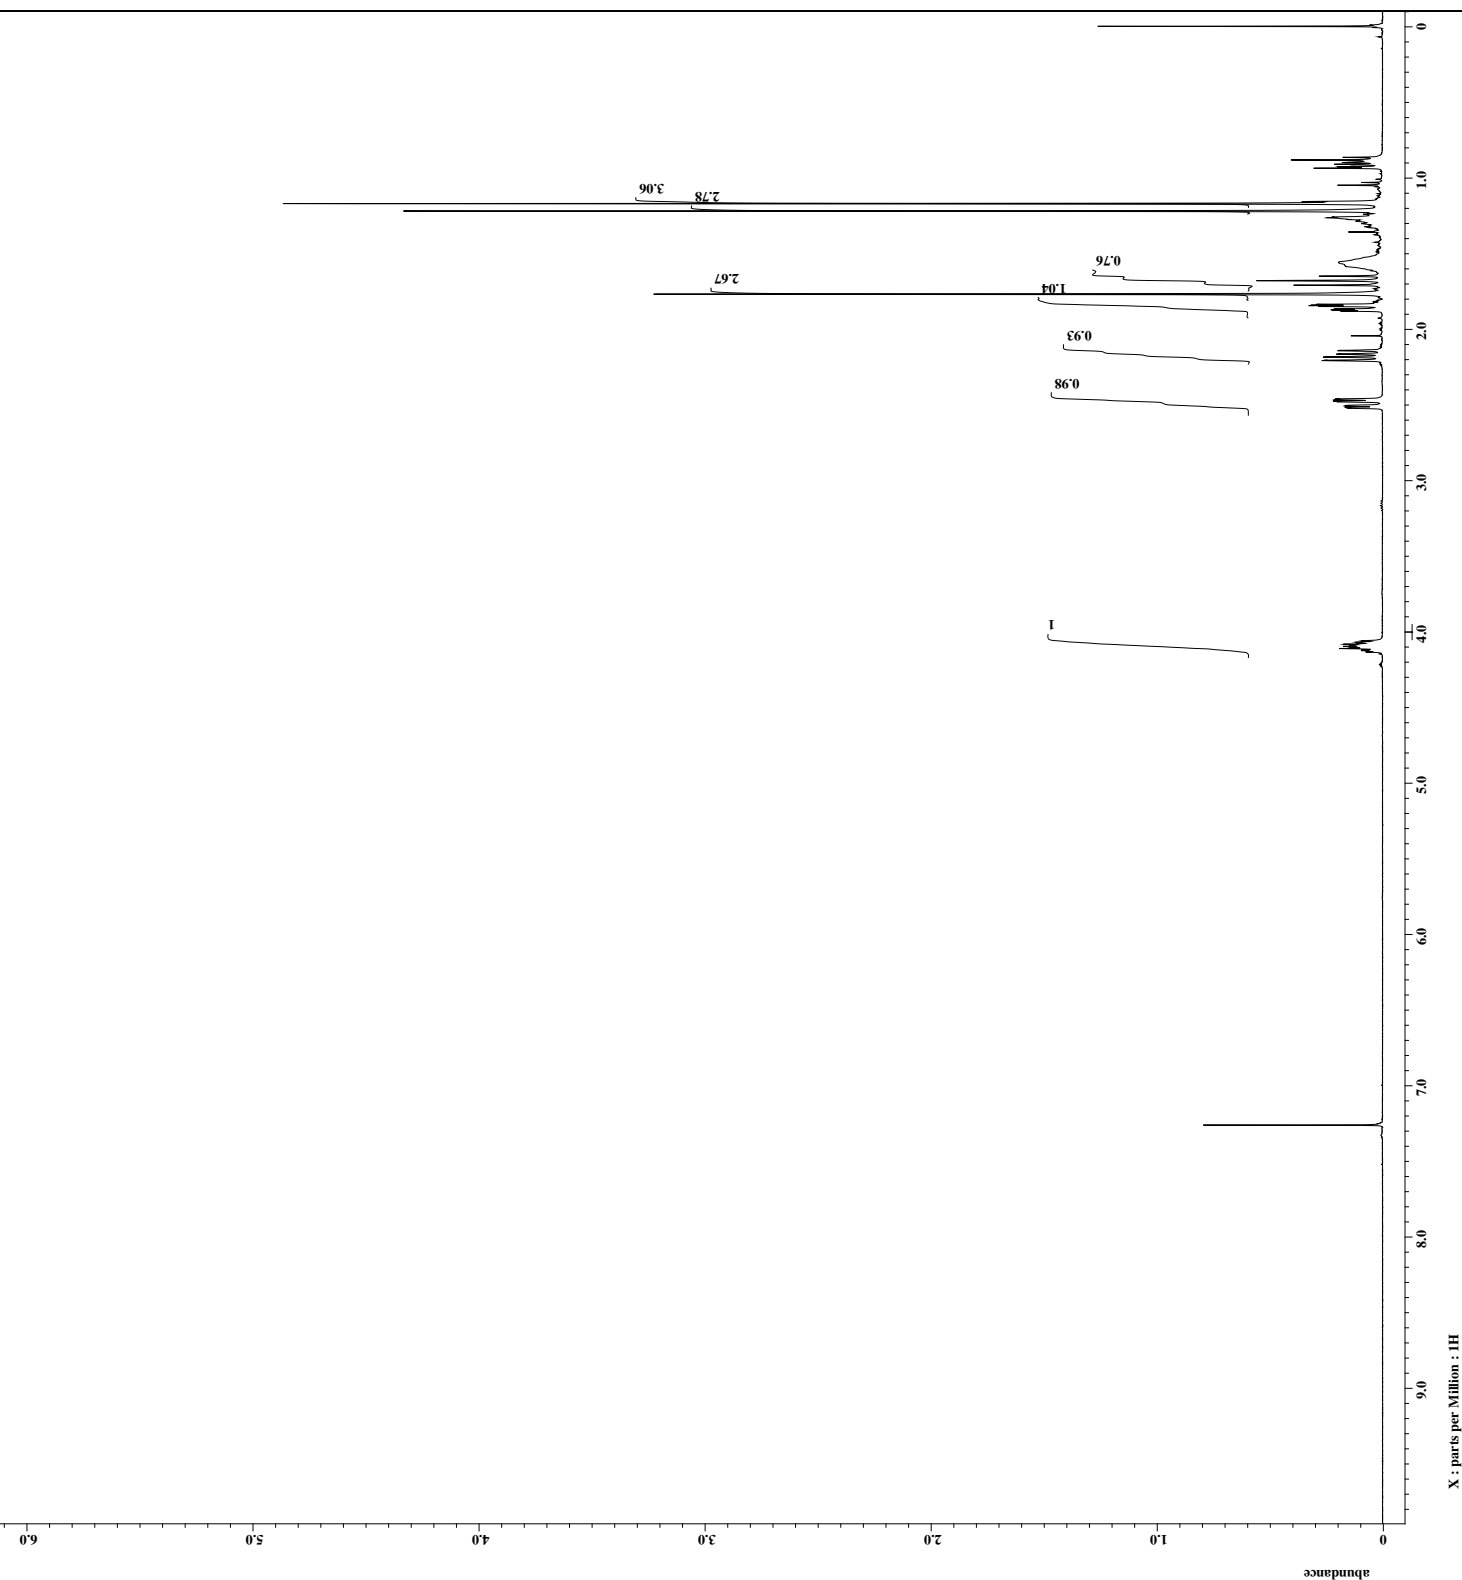



```

Filename = dl-triflate-alcohol-1
Author = delta
Experiment = delta_pulse_dec
Sample_id = S4484875
Solvent = CHLOROFORM-D
Creation_time = 11-AUG-2008 13:54:00
Revision_time = 29-OCT-2008 17:35:05
Current_time = 29-OCT-2008 17:35:27
Comment = single pulse decouple
Data_format = 1D COMPLEX
Dim_size = 26214
Dim_title = 13C
Dim_units = ppm
Dimensions = X
Spectrometer = ECK400M
Site = DELTA2_WMR
Field_strength = 9.389766[1] (400[MHz])
X_nucleation = 1.0433312[s]
X_domain = 13C
X_freq = 100.5253033[MHz]
X_offset = 100[ppm]
X_points = 32768
X_sweeps = 0
X_resolution = 0.9584665[Hz]
X_sweep = 31.40703518[kHz]
Irr_domain = 1H
Irr_freq = 399.78219838[MHz]
Irr_offset = 0[ppm]
Mod = PULS
Mod_return = 1
Total_scans = 471
X_00_width = 9.2[us]
X_acq_time = 1.0433312[s]
X_angle = 45[deg]
X_atn = 6.6[db]
X_pulse = 4.6[us]
Irr_atn_dec = 22[db]
Irr_noise = MALZ
Decoupling = TRUE
Initial_wait = 1[s]
Noe = TRUE
Rec_time = 5[s]
Relaxation_time = 5[s]
Relaxation_delay = 2[s]
Repetition_time = 3.0433312[s]
Temp_get = 24.7[dc]
    
```

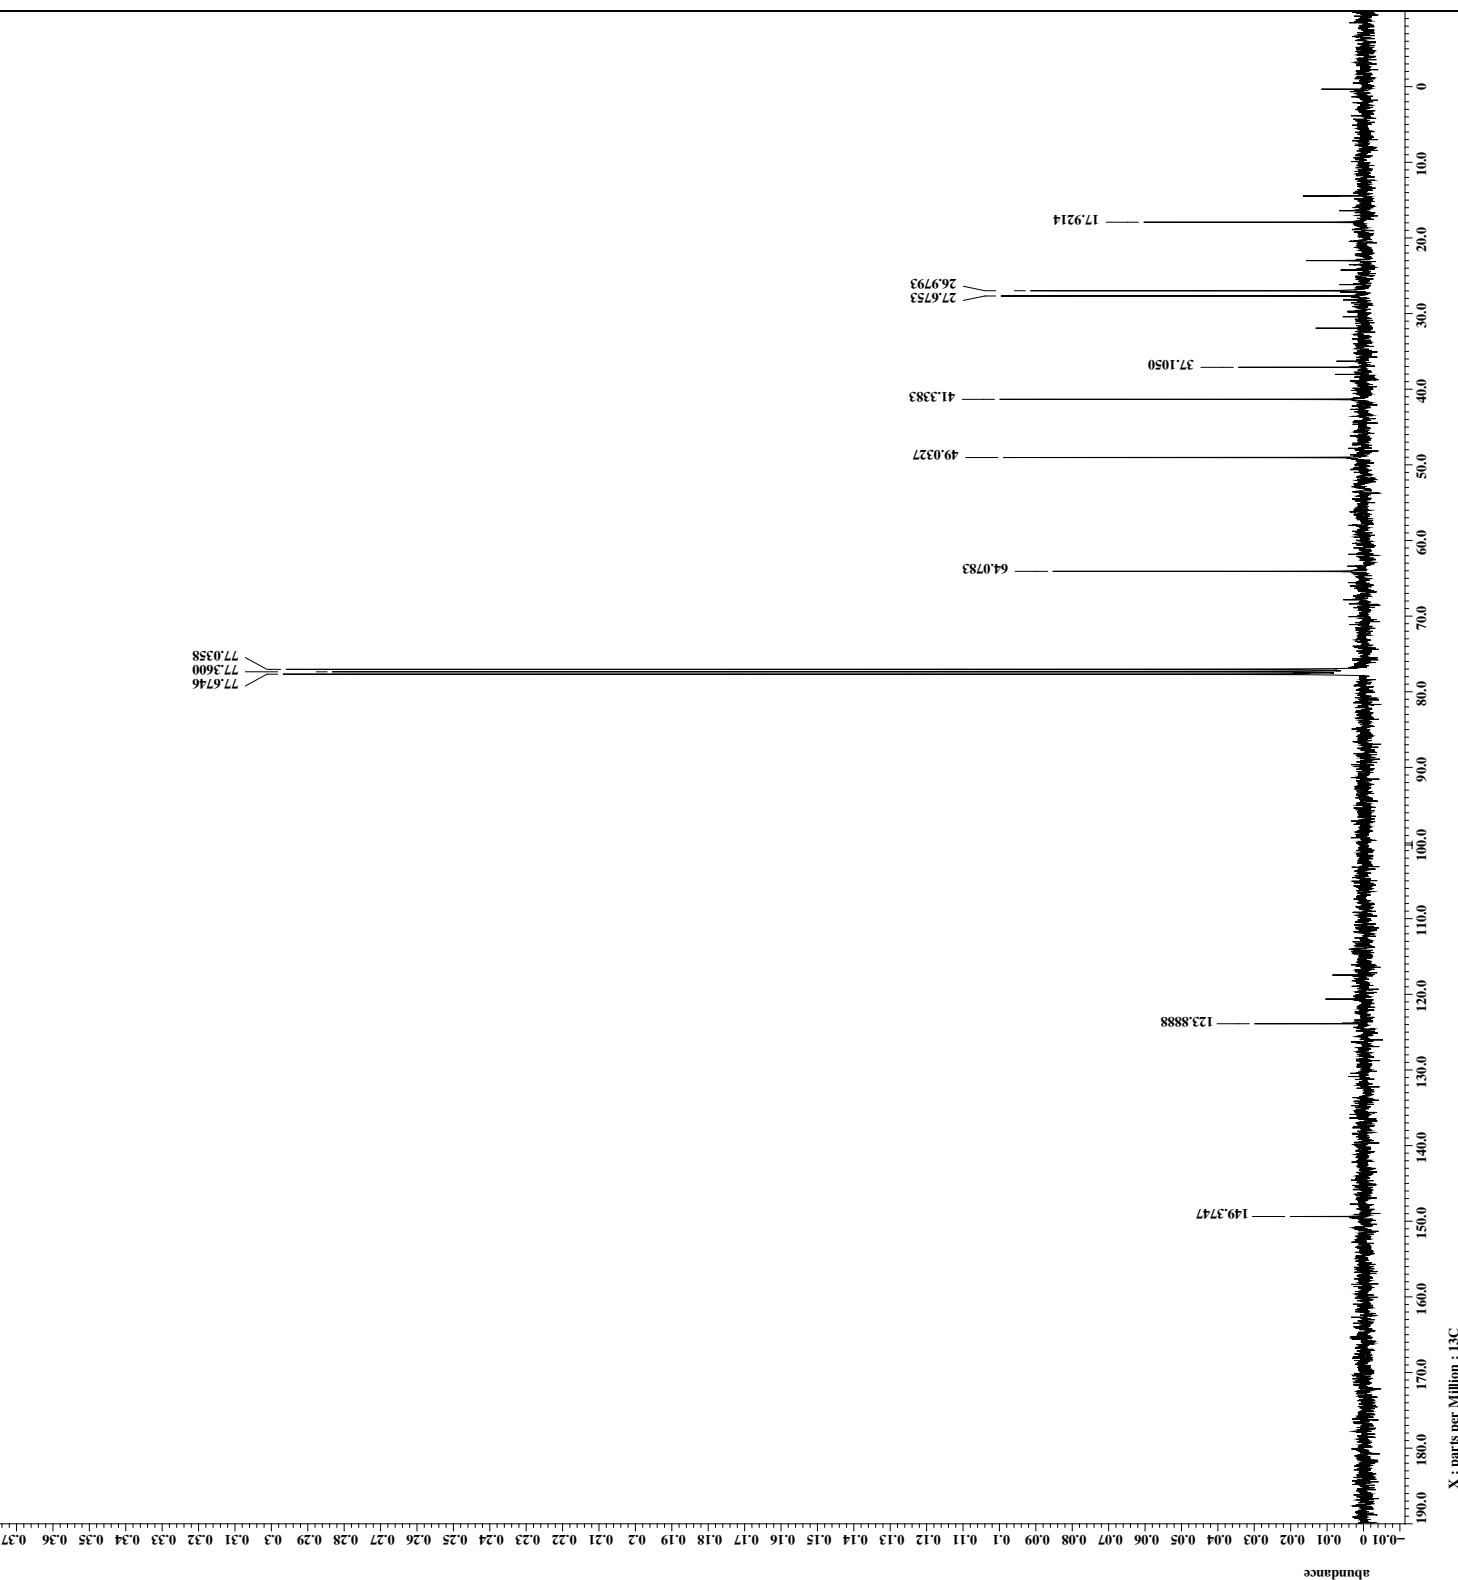

```

Filename = dl-alcohol-stannane-1
Author = delta
Experiment = 1
Angle_pulse.ex2
Sample_id = CHLOROFORM-D
Solvent = CHLOROFORM-D
Creation_time = 11-AUG-2008 17:54:25
Revision_time = 30-OCT-2008 17:00:02
Current_time = 30-OCT-2008 17:00:19
Comment = single pulse
Data_format = 1D COMPLEX
Dim_size = 13107
Dim_title = 1H
File_name = 1
Integrator = X
Ppm = X
Dimensions =
Site = ECK400M
Spectrometer = DELTA2_WMR
Field_strength = 9.389766 [T] (400 [MHz])
X_acquisition = 2.18365952 [s]
X_domain = 1H
X_freq = 399.78219838 [MHz]
X_offset = 4 [ppm]
X_points = 16384
X_resolution = 0.45794685 [Hz]
X_sweep = 7.5030012 [kHz]
IRF_domain = 1H
IRF_freq = 399.78219838 [MHz]
IRF_offset = 1 [ppm]
IRF_points = 16384
IRF_resolution = 0.45794685 [Hz]
IRF_sweep = 7.5030012 [kHz]
Tr1_freq = 399.78219838 [MHz]
Tr1_offset = 5 [ppm]
Clipped = FALSE
Mod_return = 1
Scans = 8
Total_scans = 8
X_90_width = 10.45 [us]
X_acq_time = 2.18365952 [s]
X_angle = 45 [deg]
X_delay = 5.225 [us]
X_pulse = 5.225 [us]
IRF_mode = Off
Tr1_mode = Off
Dante_preset = FALSE
Pulprogr = zgpg30
Relax_wait = 3 [s]
Relaxation_delay = 1 [s]
Repetition_time = 3.18365952 [s]
Temp_get = 24.4 [dC]
    
```

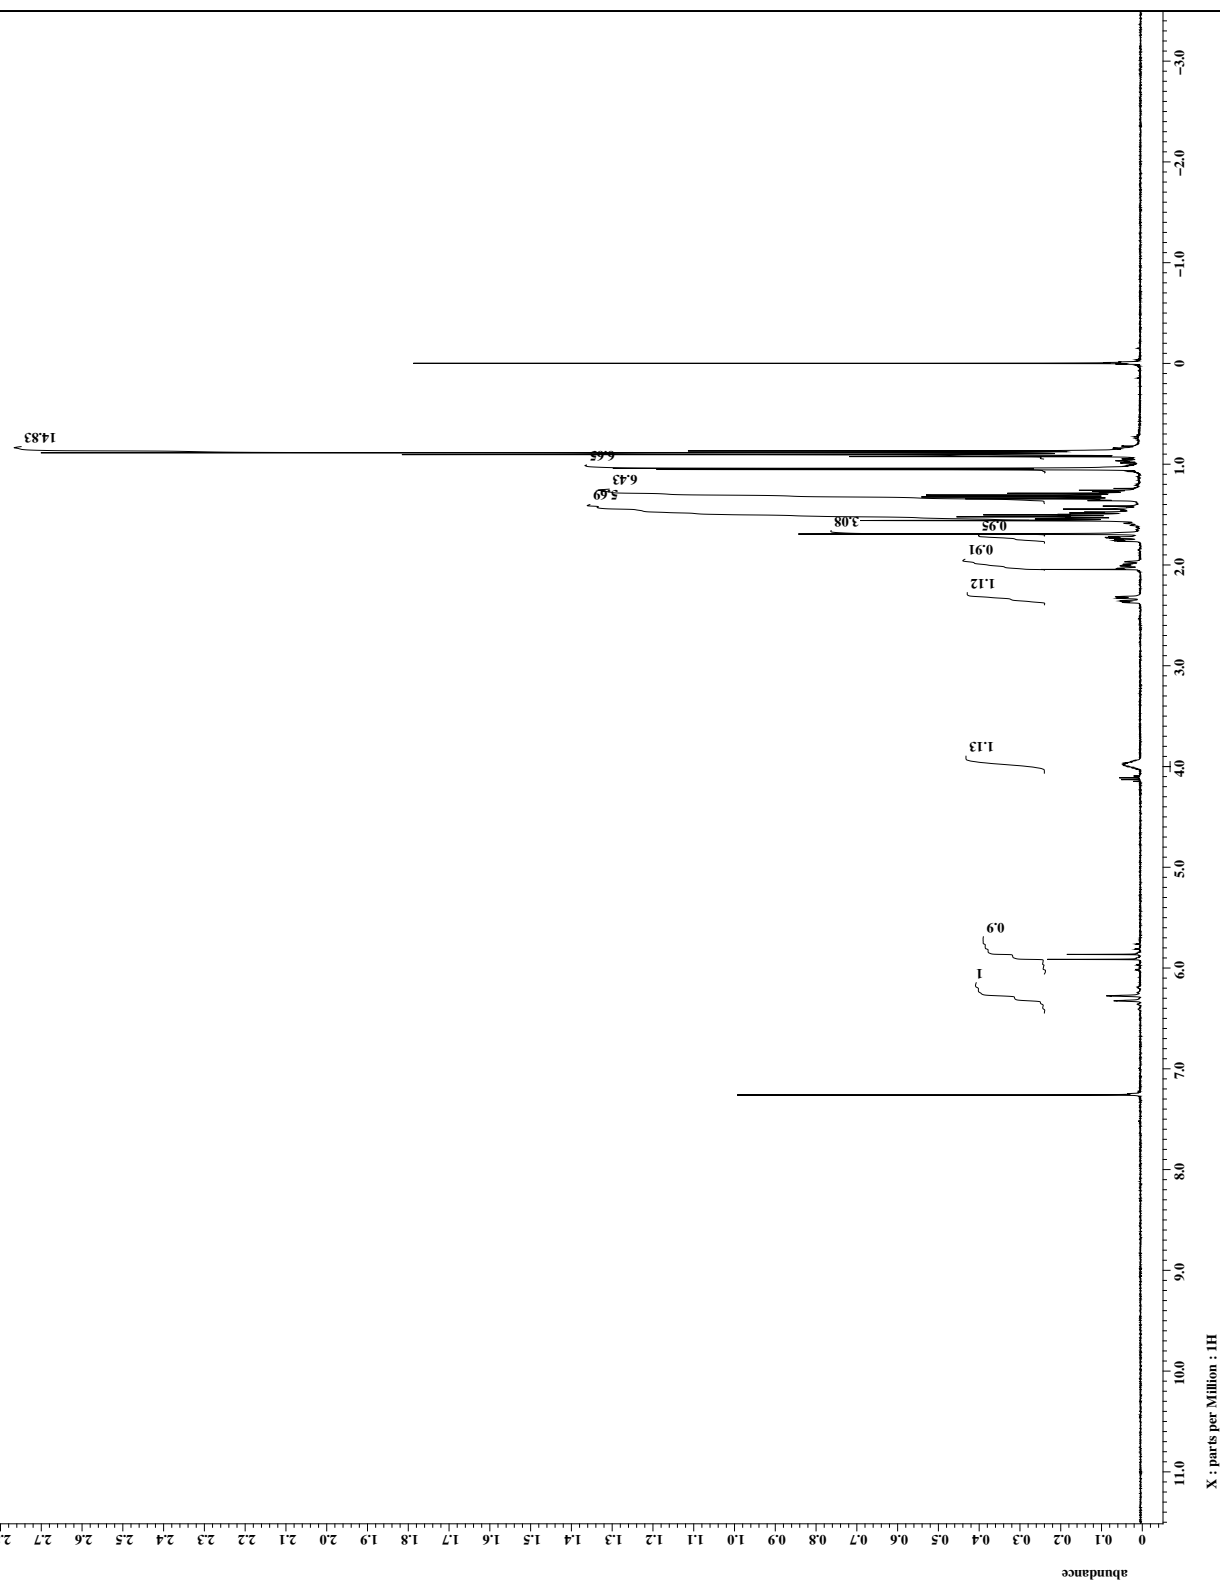

```

Filename = dl-alcohol-stannane-1
Author =
Experiment = delta_pulse_dec
Sample_id = S165271
Solvent = CHLOROFORM-D
Creation_time = 11-AUG-2008 18:48:35
Revision_time = 29-OCT-2008 17:32:17
Current_time = 29-OCT-2008 17:32:44
Comment = single pulse decouple
Data_format = 1D COMPLEX
Dim_size = 26214
Dim_title =
Dim_units =
Dimensions = X [ppm]
Site = EXX400M
Spectrometer = DELTA2_NMR
Field_strength = 9.389766 [T] (400 [MHz])
X_nucleation = 1.0433312 [s]
X_domain = 13C
X_freq = 100.5253033 [MHz]
X_offset = 100 [ppm]
X_points = 32768
X_sweeps =
X_resolution = 0.9584665 [Hz]
X_sweep = 31.40703518 [kHz]
Irr_domain = 1H
Irr_freq = 399.78219838 [MHz]
Irr_offset = 5 [ppm]
Mod_return = TRUE
Total_scans = 1000
X_90_width = 9.2 [us]
X_acq_time = 1.0433312 [s]
X_angle = 45 [deg]
X_atn = 6.6 [dB]
X_pulse = 4.6 [us]
Irr_atn_dec = 22 [dB]
Irr_noise = MALZ
Decoupling = TRUE
Initial_wait = 1 [s]
Noe = TRUE
Rec_time = 6 [s]
Relaxation_delay = 2 [s]
Repetition_time = 3.0433312 [s]
Temp_get = 24.1 [dc]
    
```

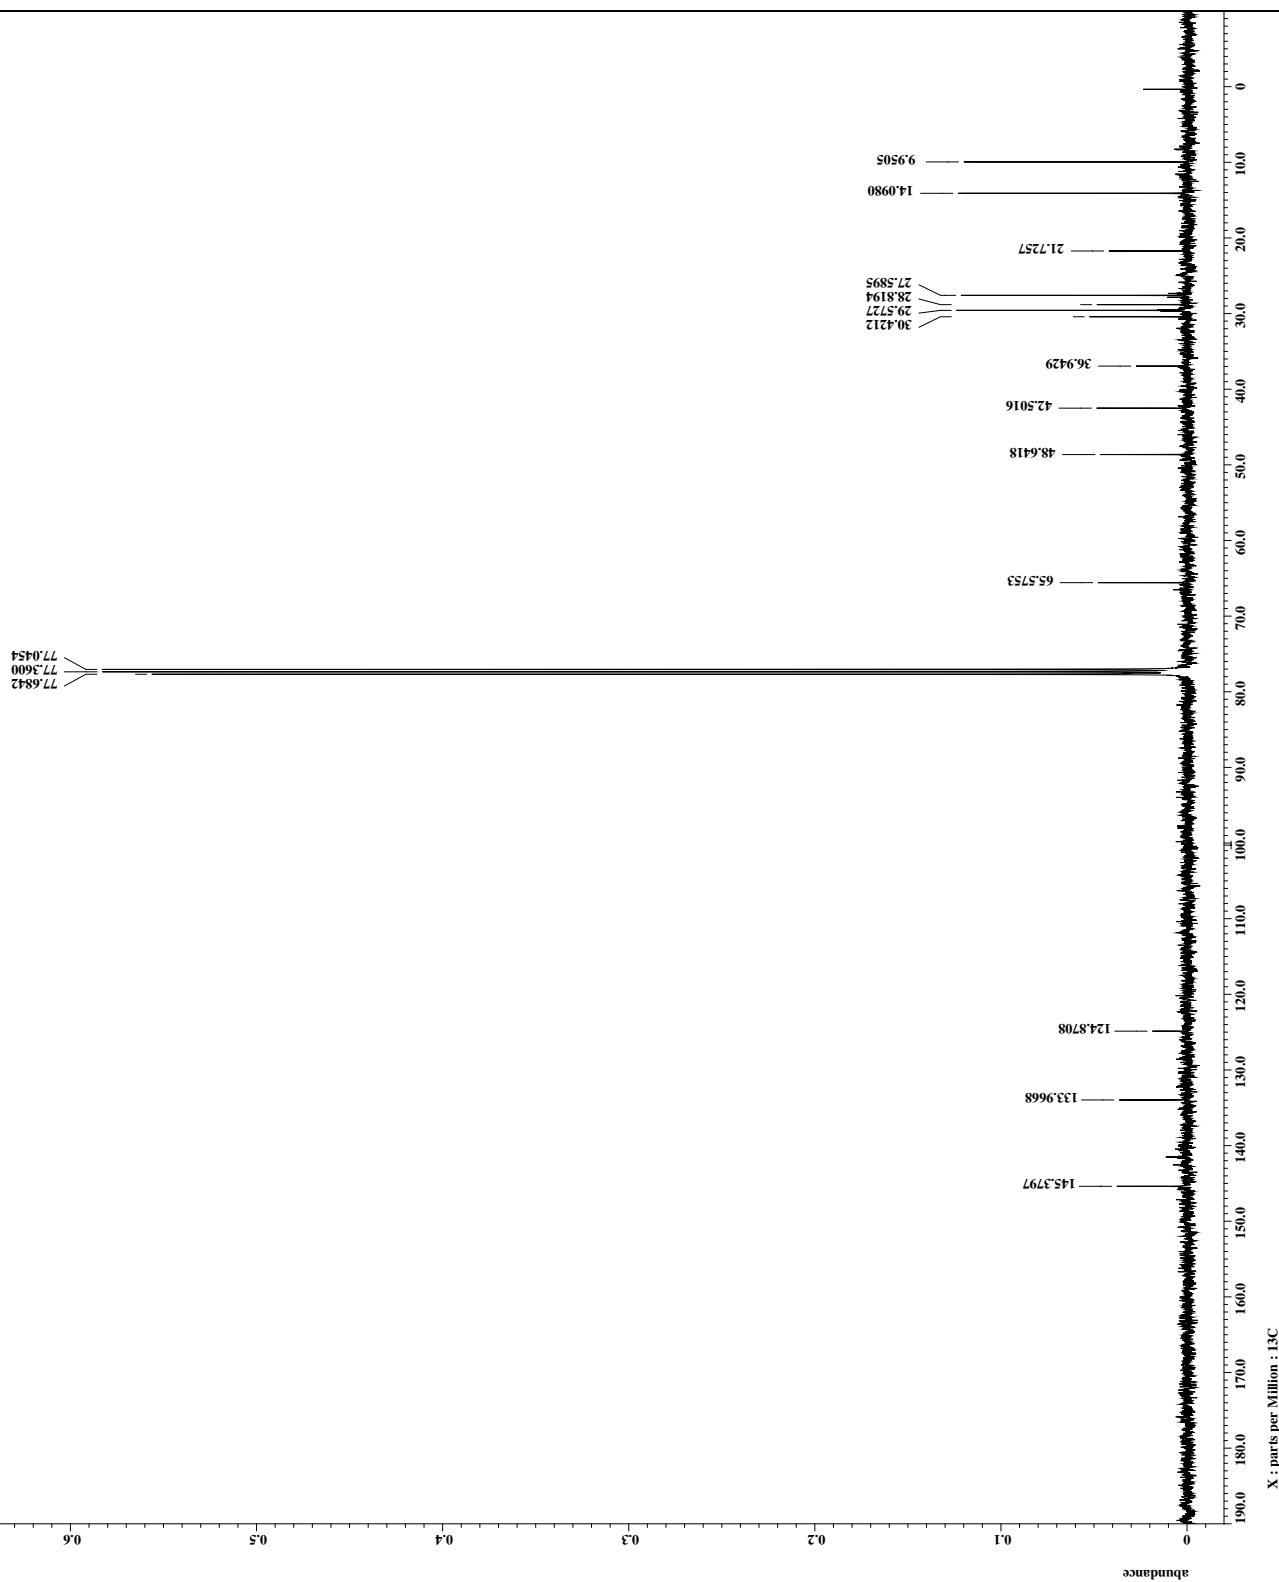

```

Filename = dl-alcohol-iodide-1H-
Author = delta
Experiment = 1
Acq_date = 11-AUG-2008 20:06:55
Sample_id = CHLOROFORM-D
Solvent = CHLOROFORM-D
Creation_time = 30-OCT-2008 16:57:04
Revision_time = 30-OCT-2008 16:57:04
Current_time =
Comment = single pulse
Data_format = 1D COMPLEX
Dim_size = 13107
Dim_title = 1H
F1 = 400.1419900 [ppm]
F2 = 101.6283552 [ppm]
Dimensions = 13107 x 1
Site = ECX400M
Spectrometer = DELTA2_WMR
Field_strength = 9.389766 [T] (400 [MHz])
X_acquisition = 2.18365952 [s]
X_domain = 1H
X_freq = 399.78219838 [MHz]
X_offset = 4 [ppm]
X_points = 16384
X_resolution = 0.45794685 [Hz]
X_sweep = 7.5030012 [kHz]
Irr_domain = 1H
Irr_freq = 399.78219838 [MHz]
Irr_offset = 1 [ppm]
Irr_points = 16384
Irr_resolution = 0.45794685 [Hz]
Irr_sweep = 7.5030012 [kHz]
Mod_return = 5 [ppm]
Clipped = FALSE
Scans = 1
Total_scans = 8
X_90_width = 10.45 [us]
X_acq_time = 2.18365952 [s]
X_angle = 45 [deg]
X_delay = 5.225 [us]
X_pulse = 5.225 [us]
Irr_mode = Off
Irr_modulation = Off
Dante_preset = FALSE
Relaxation_wait = 3 [s]
Relaxation_delay = 1 [s]
Repetition_time = 3.18365952 [s]
Temp_get = 24.1 [degC]
    
```

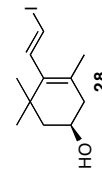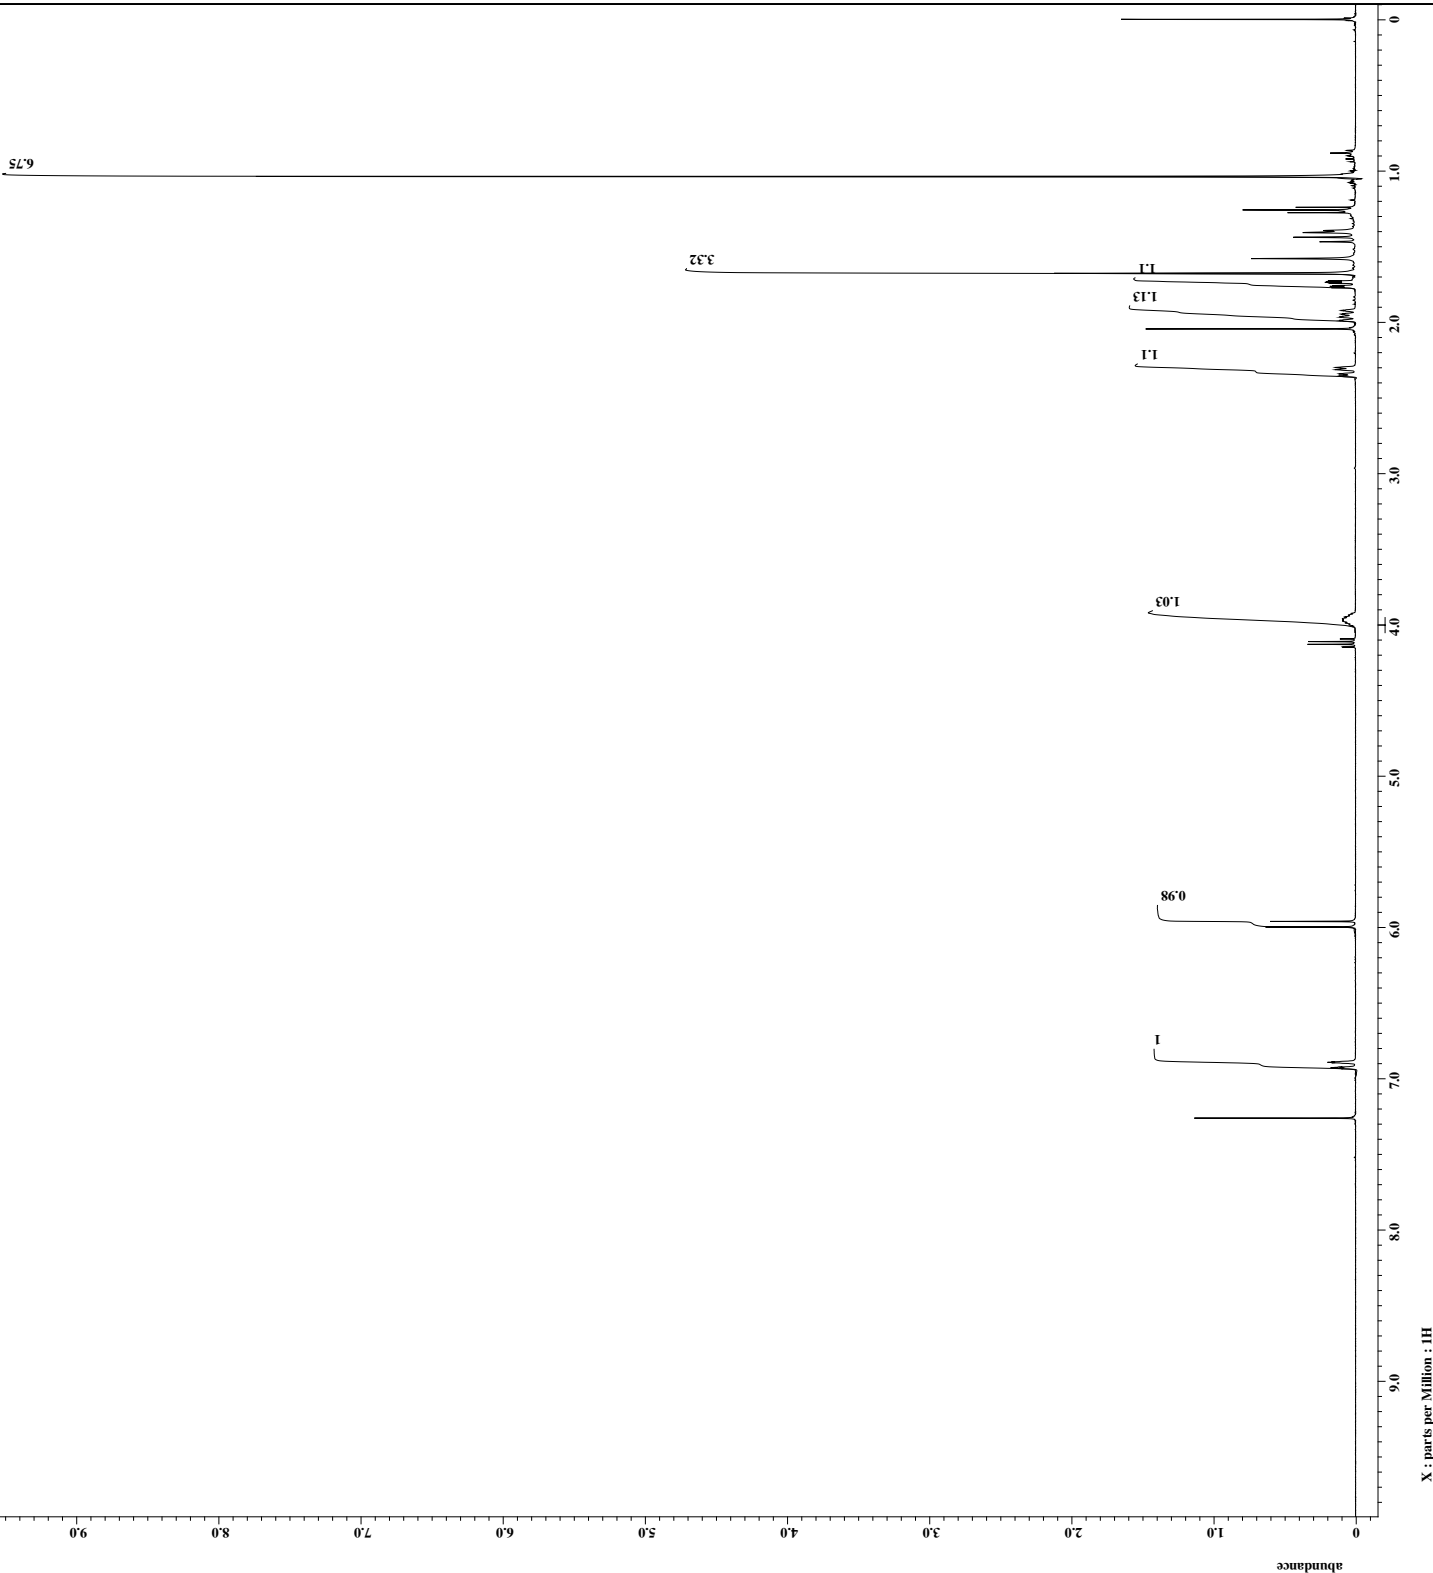

```

Filename = dl-alcohol-iodide-13c
Author = delta
Experiment = delta_pulse_dec
Sample_id = S1734508
Solvent = CHLOROFORM-D
Creation_time = 11-AUG-2008 20:50:05
Revision_time = 29-OCT-2008 17:30:54
Current_time = 29-OCT-2008 17:31:20
Comment = single pulse decouple
Data_format = 1D COMPLEX
Dim_size = 26214
Dim_title = 13c
Dim_units = [ppm]
Dimensions = X
Site = ECK400M
Spectrometer = DELTA2_WMR
Field_strength = 9.389766171 (400[MHz])
X_nucleation = 1.043331212[s]
X_domain = 13c
X_freq = 100.52530333[MHz]
X_offset = 100[ppm]
X_points = 32768
X_sweeps = 1
X_resolution = 0.95846665[Hz]
X_sweep = 31.40703518[kHz]
Irr_domain = 1H
Irr_freq = 399.78219838[MHz]
Irr_offset = 51[ppm]
Modulation = TRUE
Mod_return = 1
Total_scans = 605
X_90_width = 9.2[us]
X_acq_time = 1.043331212[s]
X_angle = 45[deg]
X_atn = 6.6[db]
X_pulse = 4.6[us]
Irr_atn_dec = 22[db]
Irr_noise = MALZ
Decoupling = TRUE
Initial_wait = 1[s]
Noe = TRUE
Rec_time = 5[s]
Relaxation_delay = 3[s]
Repetition_time = 4.043331212[s]
Temp_get = 24.5[dc]
    
```

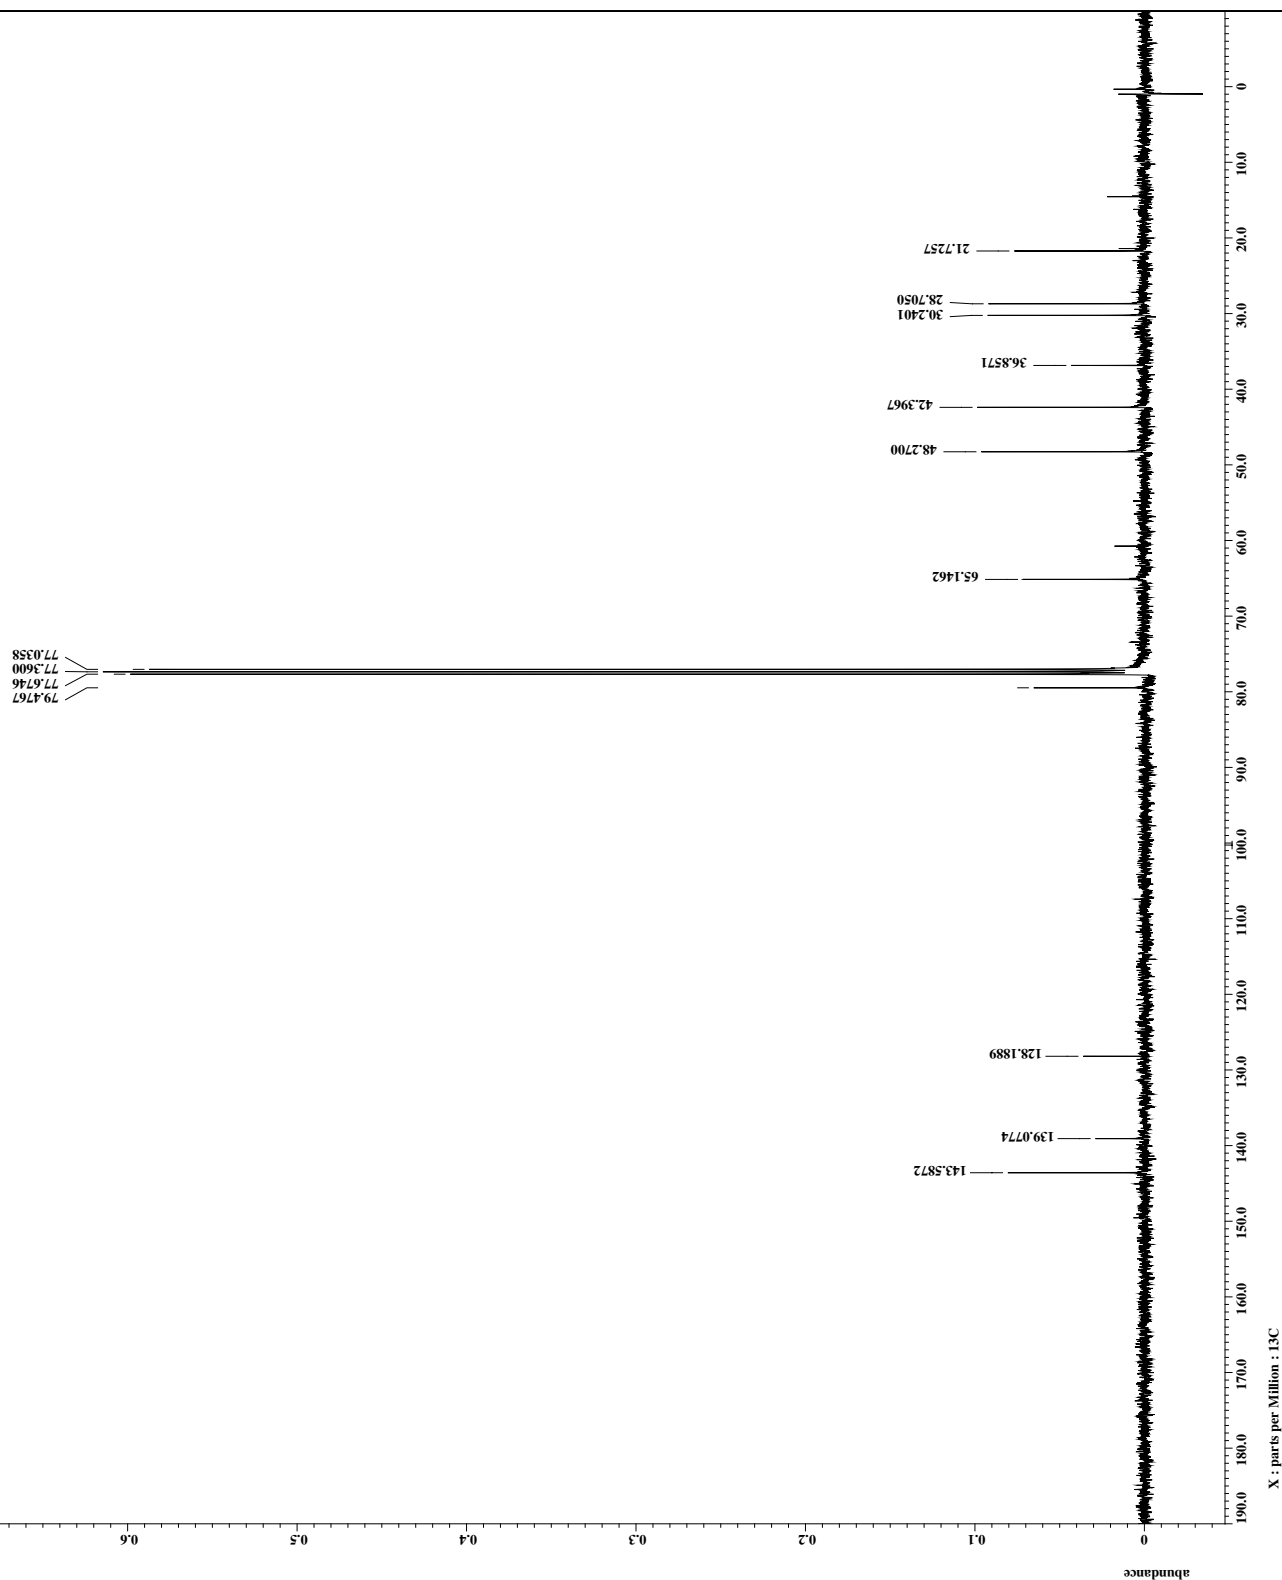

```

Filename = dl-acetyl-iodide-1H-2
Author =
Experiment =
Sample_id = 1
Solvent = CHLOROFORM-D
Creation_time = 12-AUG-2008 12:53:35
Revision_time = 30-OCT-2008 16:55:18
Current_time = 30-OCT-2008 16:55:39
Comment =
Data_format = single pulse
Dim_size = 1D COMPLEX
Dim_title =
Dimensions =
Site =
Spectrometer = DELTA2_NMR
Field_strength = 9.389766 [T] (400 [MHz])
X_acquisition = 2.18365952 [s]
X_domain = 1H
X_freq = 399.78219838 [MHz]
X_offset = 4 [ppm]
X_points = 16384
X_resolution = 0.45794685 [Hz]
X_sweep = 7.5030012 [kHz]
Irr_domain = 1H
Irr_freq = 399.78219838 [MHz]
Irr_offset = 1 [ppm]
Mod_return = 1
Peta_scans = 8
X_90_width = 10.45 [us]
X_acq_time = 2.18365952 [s]
X_angle = 45 [deg]
X_pulse = 5.225 [us]
Irr_mode = Off
Dante_preset = FALSE
Relax_wait = 3 [s]
Relaxation_delay = 1 [s]
Repetition_time = 3.18365952 [s]
Temp_get = 23.6 [dC]
    
```

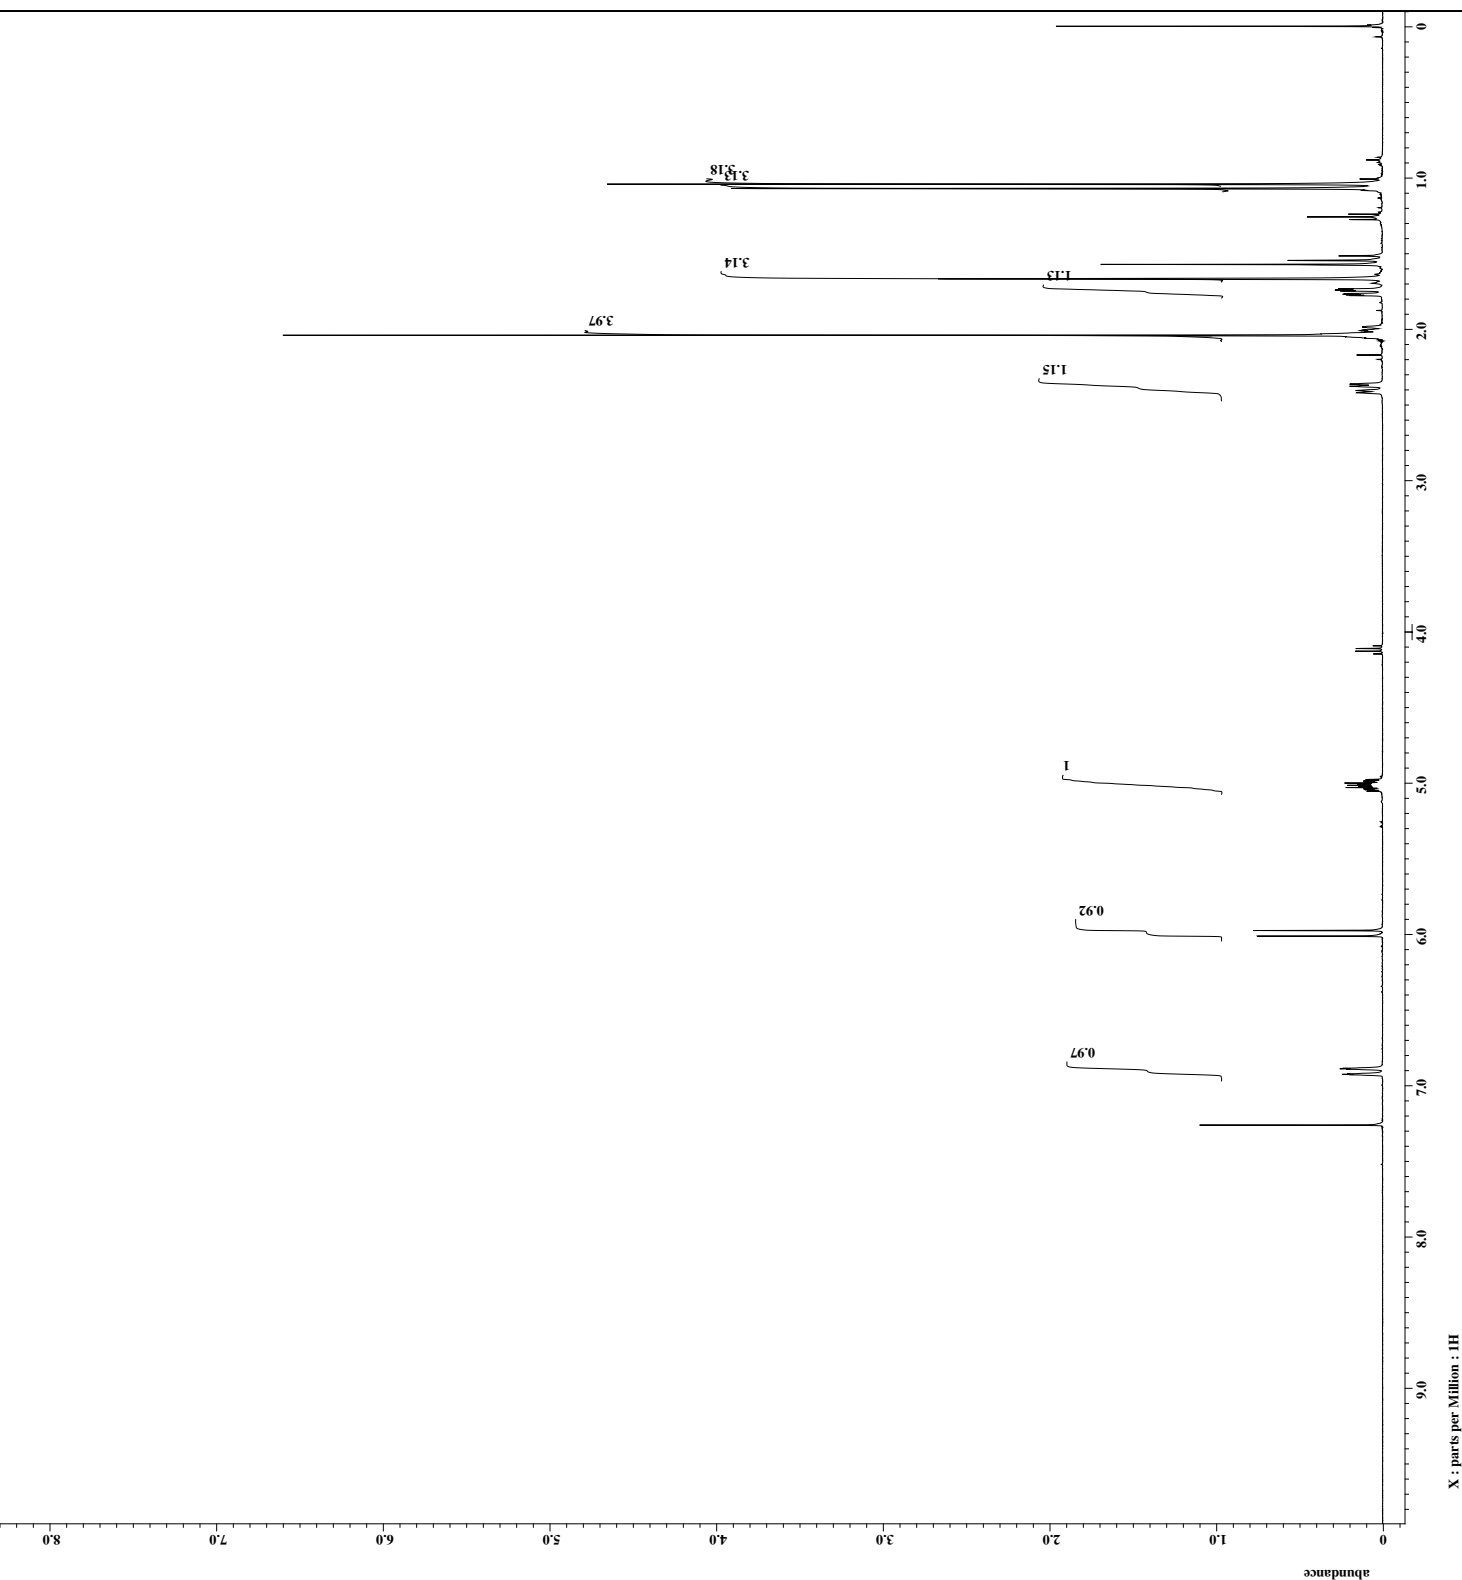

```

Filename = dl-acetyl-iodide-13C-
Author =
Experiment =
Sample_id = S1484539
Solvent = CHLOROFORM-D
Creation_time = 12-AUG-2008 13:30:38
Revision_time = 29-OCT-2008 17:28:53
Current_time = 29-OCT-2008 17:29:19
Comment = single pulse decouple
Data_format = 1D COMPLEX
Dim_size = 26214
Dim_title = 13C
File_name =
Dimensions = X [ppm]
Site = ECX400M
Spectrometer = DELTA2_NMR
Field_strength = 9.389766 [T] (400 [MHz])
X_coordination = 1.04333312 [s]
X_domain = 13C
X_freq = 100.52530333 [MHz]
X_offset = 100 [ppm]
X_points = 32768
X_resolution = 0.95846665 [Hz]
X_sweep = 31.40703518 [kHz]
Irr_domain = 1H
Irr_freq = 399.78219838 [MHz]
Irr_offset = 0 [ppm]
Mod_return = 1
Scans = 337
Total_scans = 337
X_90_width = 9.2 [us]
X_acq_time = 1.04333312 [s]
X_angle = 45 [deg]
X_atn = 6.6 [dB]
X_pulse = 4.6 [us]
Irr_atn_dec = 22 [dB]
Irr_delay = 1.5 [s]
Irr_noise [dB] = MALZ
Decoupling = TRUE
Initial_wait = 1 [s]
Noe = TRUE
Poc_time = 5 [s]
Relaxation_delay = 5 [s]
Relaxation_time = 6.04333312 [s]
Repetition_time = 23.8 [s]
Temp_get =
    
```

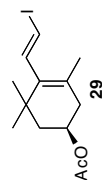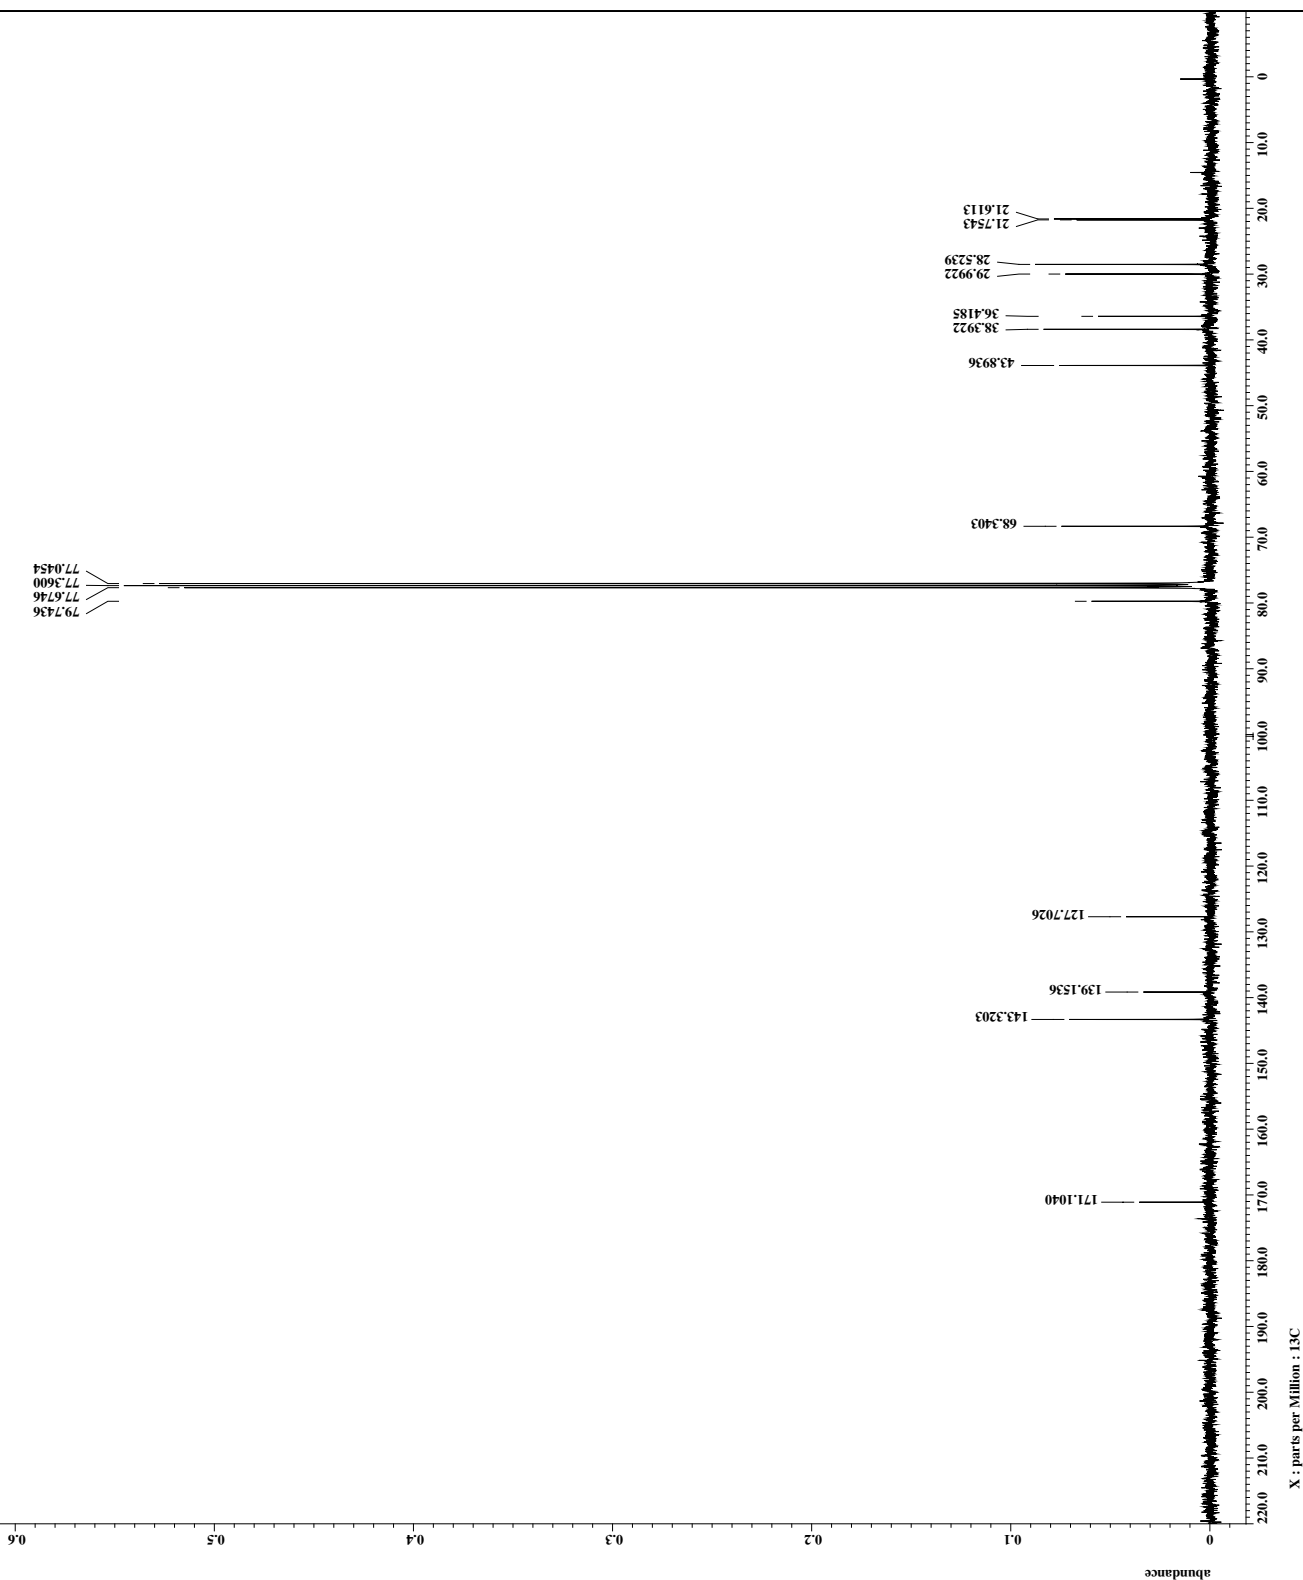

```
Filename = dl-tetraene-alcohol-1
Author = delta
Experiment = 1
Acq_pulse = ex2
Sample_id = CHLOROFORM-D
Solvent = CHLOROFORM-D
Creation_time = 12-AUG-2008 18:25:29
Revision_time = 30-OCT-2008 17:12:03
Current_time = 30-OCT-2008 17:12:23
Comment = single pulse
Data_format = 1D COMPLEX
Dim_size = 13107
Dim_title = 1H
File_name = 1
Dimensions = X [ppm]
Site = ECX400M
Spectrometer = DELTA2_WMR
Field_strength = 9.389766 [T] (400 [MHz])
X_acq_time = 2.18365952 [s]
X_domain = 1H
X_freq = 399.78219838 [MHz]
X_offset = 4 [ppm]
X_points = 16384
X_resolution = 0.45794685 [Hz]
X_sweep = 7.5030012 [kHz]
IRF_domain = 1H
IRF_freq = 399.78219838 [MHz]
IRF_offset = 1 [ppm]
IRF_resolution = 0.45794685 [Hz]
IRF_sweep = 7.5030012 [kHz]
Tr1_freq = 399.78219838 [MHz]
Tr1_offset = 5 [ppm]
Clipped = FALSE
Mod_return = 1
Scans = 8
Total_scans = 8
X_90_width = 10.45 [us]
X_acq_time = 2.18365952 [s]
X_angle = 45 [deg]
X_delay = 5.235 [us]
X_pulse = 5.235 [us]
IRF_mode = Off
IRF_mode2 = Off
Dante_preset = FALSE
Pulse_wait = 3 [s]
Relaxation_delay = 1 [s]
Repetition_time = 3.18365952 [s]
Temp_get = 24 [C]
```

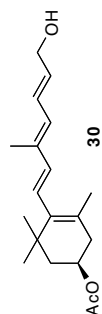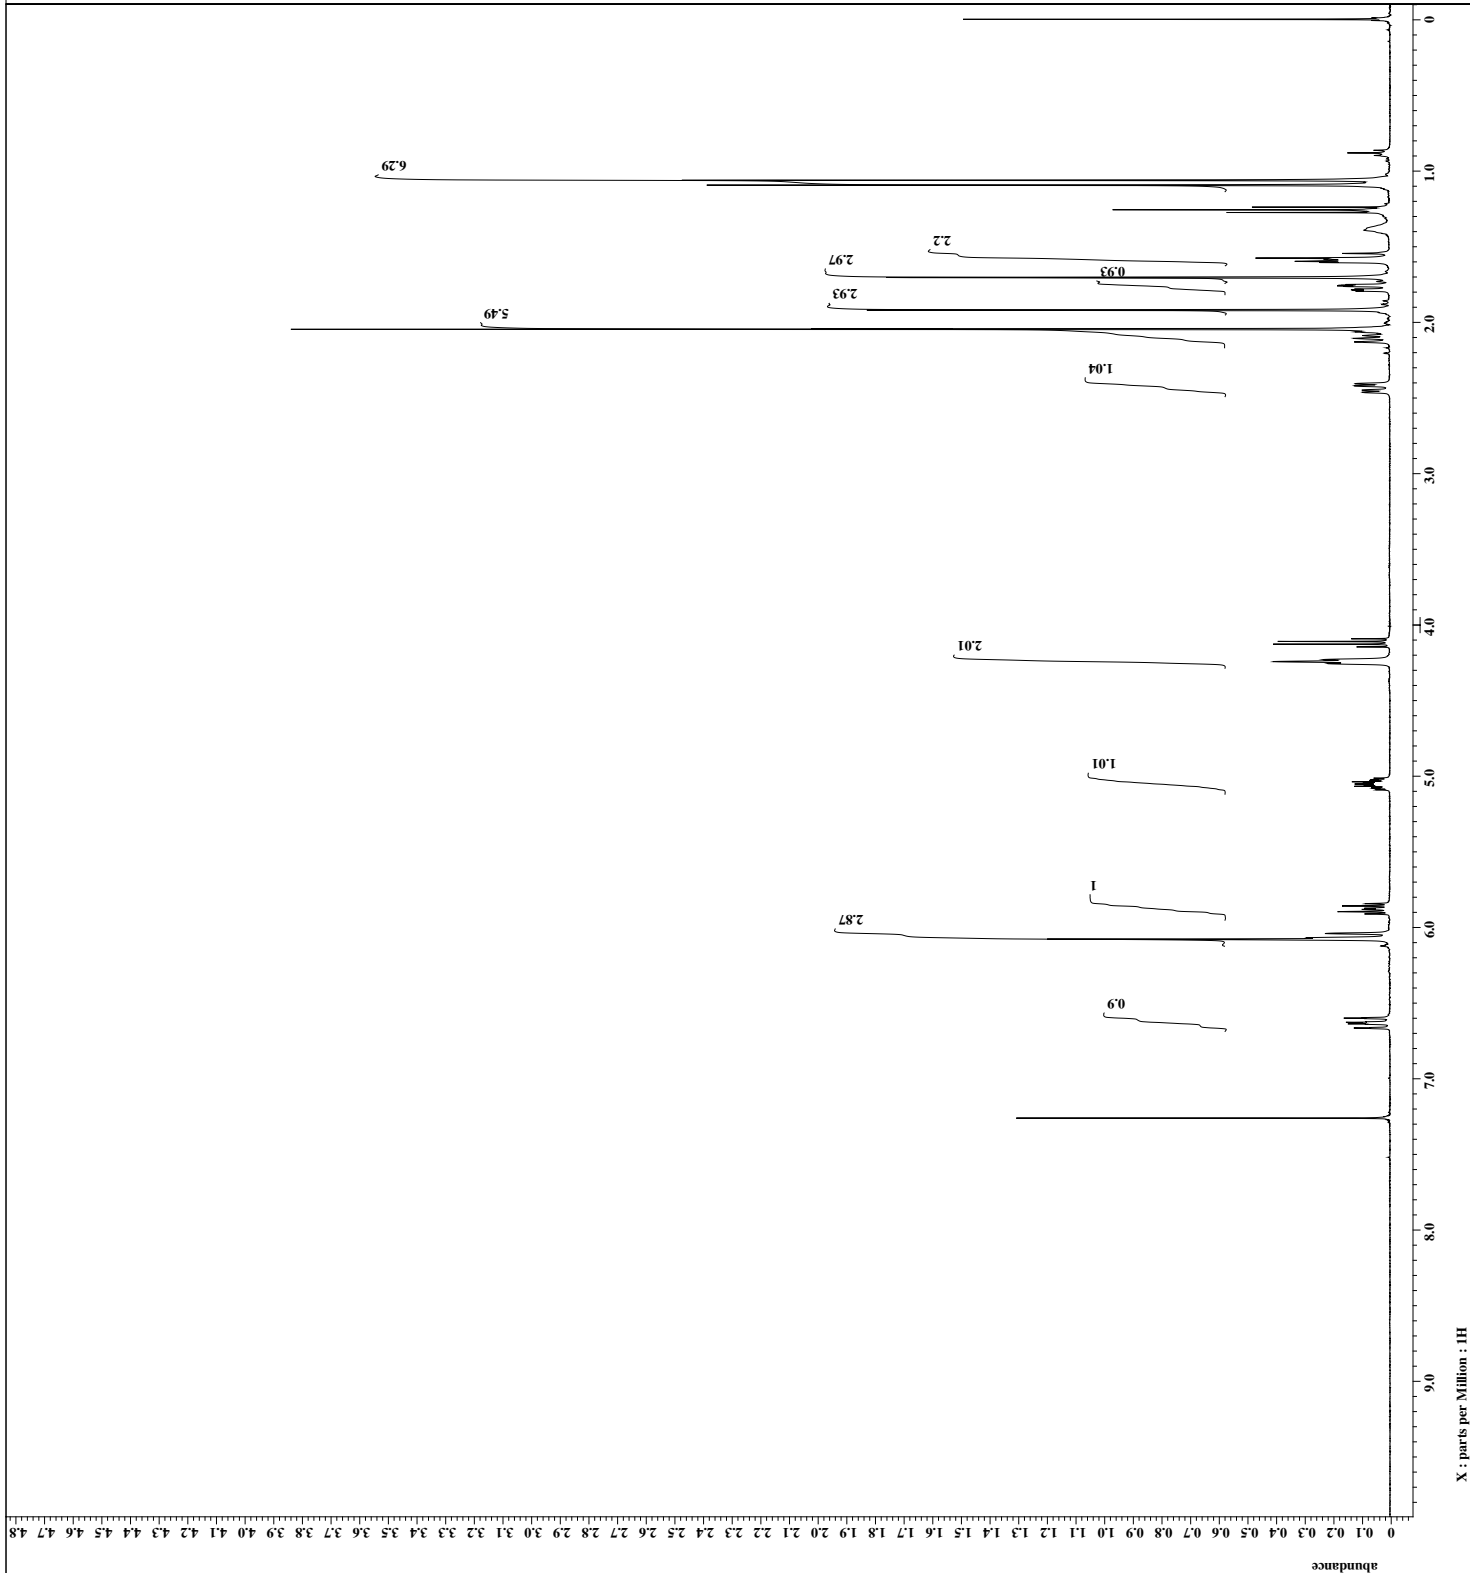



```

Filename = dl-tetraene-alcohol-1
Author = delta
Experiment = delta_pulse_dec
Sample_id = S1683736
Solvent = CHLOROFORM-D
Creation_time = 12-AUG-2008 19:04:57
Revision_time = 29-OCT-2008 17:33:47
Current_time = 29-OCT-2008 17:34:30
Comment = single pulse decouple
Data_format = 1D COMPLEX
Dim_size = 26214
Dim_title = 13C
Dim_units = X [ppm]
Dimensions = X
Site = EXC400M
Spectrometer = DELTA2_WMR
Field_strength = 9.389766 [T] (400 [MHz])
X_nucleation = 1.0433312 [s]
X_domain = 13C
X_freq = 100.5253033 [MHz]
X_offset = 100 [ppm]
X_points = 32768
X_sweeps = 0.9584665 [Hz]
X_resolution = 31.40703518 [kHz]
X_sweep = 1H
Irr_domain = 399.78219838 [MHz]
Irr_freq = 1 [ppm]
Irr_offset = 1 [ppm]
Mod_return = 1
Total_scans = 365
X_90_width = 9.2 [us]
X_acq_time = 1.0433312 [s]
X_angle = 45 [deg]
X_atn = 6.6 [dB]
X_pulse = 4.6 [us]
Irr_atn_dec = 22 [dB]
Irr_noise = MALZ
Decoupling = TRUE
Initial_wait = 1 [s]
Noe = TRUE
Rec_time = 50 [s]
Relaxation_delay = 5 [s]
Repetition_time = 6.0433312 [s]
Temp_get = 24.5 [dc]
    
```

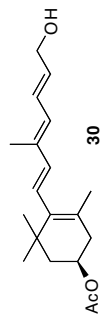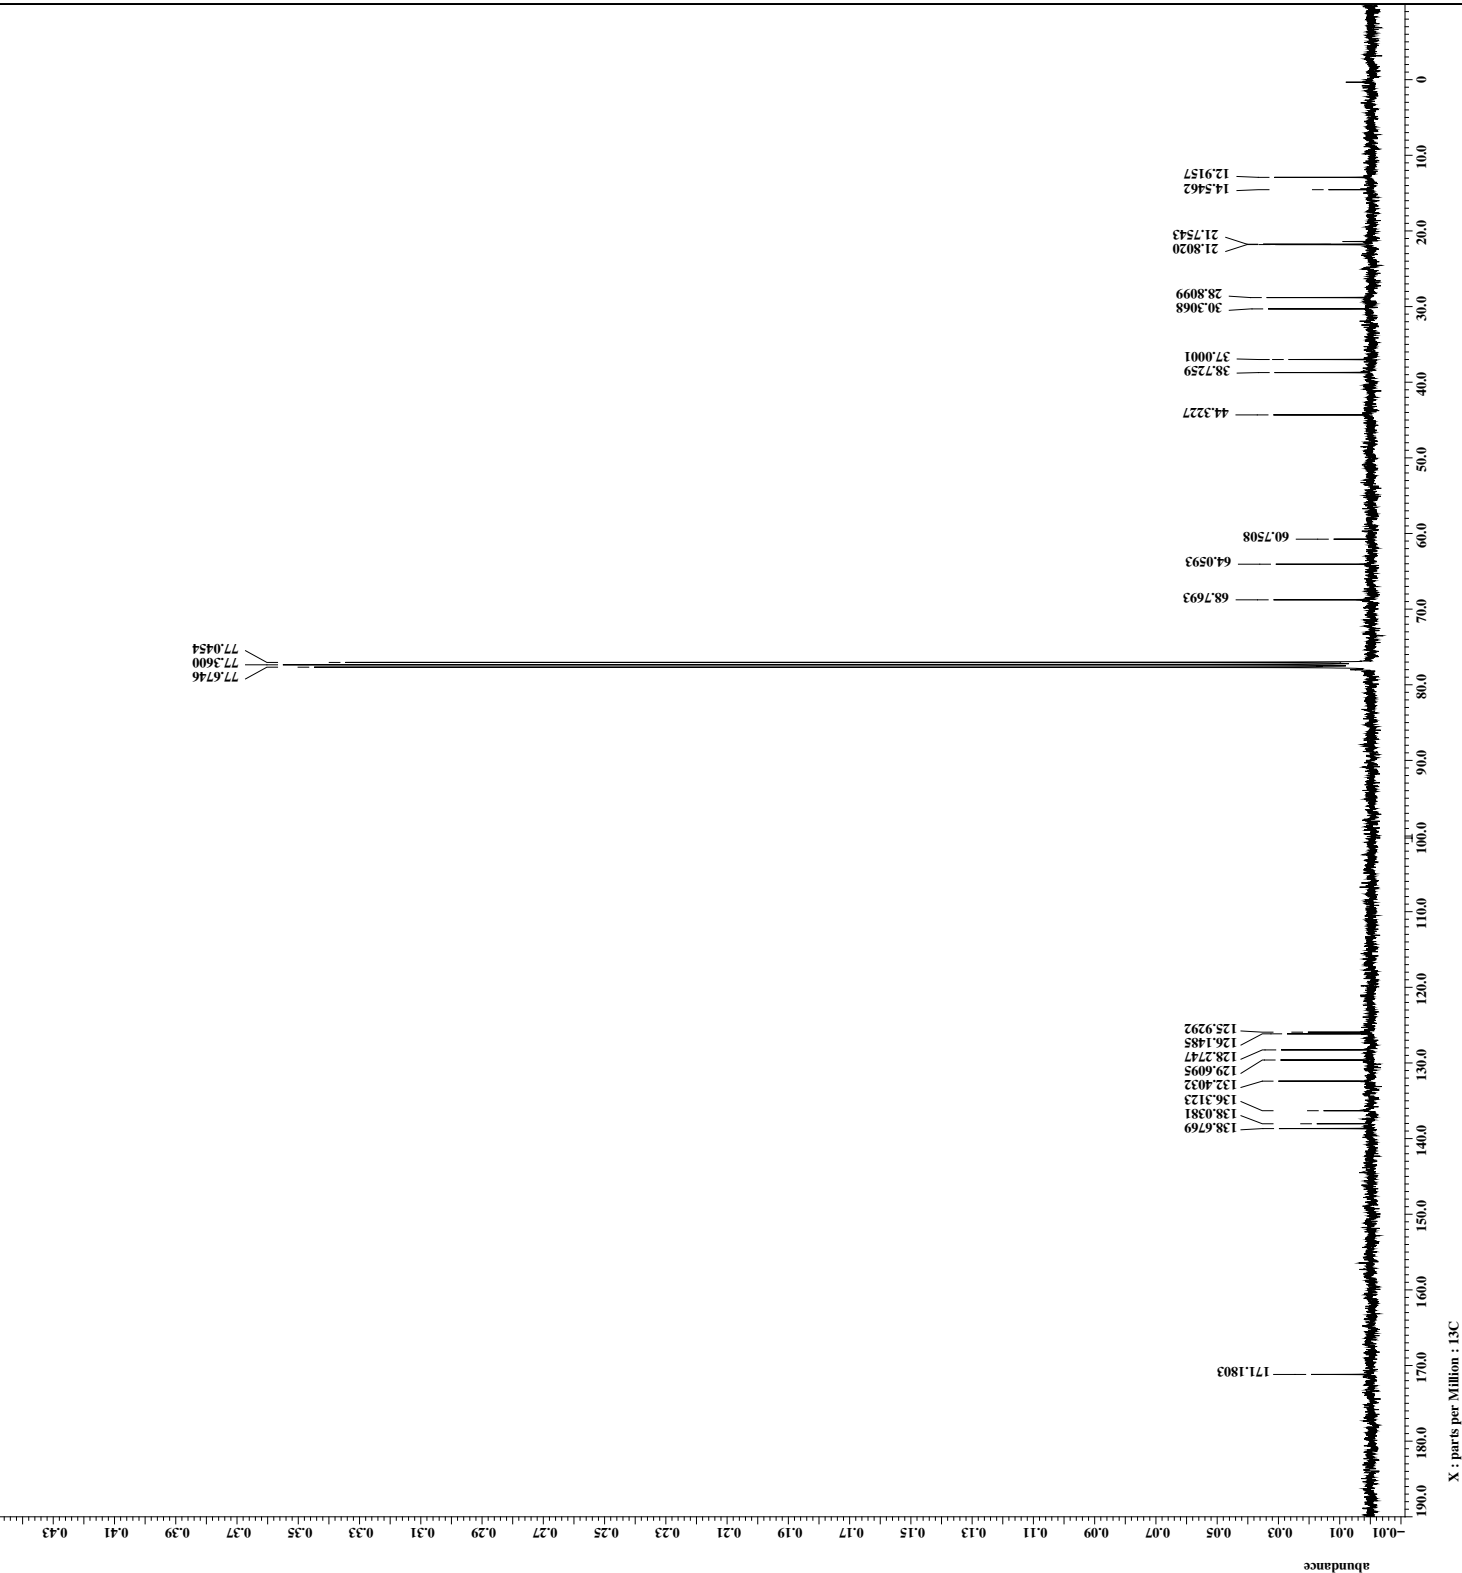

```

Filename = dl-sulfide-1H-2-j4f
Author = delta
Experiment = 1
Angle_pulse_ex2 = 1
Sample_id = CHLOROFORM-D
Solvent = CHLOROFORM-D
Creation_time = 14-AUG-2008 13:20:06
Revision_time = 30-OCT-2008 17:03:29
Current_time = 30-OCT-2008 17:03:45
Comment = single pulse
Data_format = 1D COMPLEX
Dim_size = 13107
Dim_title = 1H
File_name = 1
Integrator = X
Integrator_dimensions = X
Integrator_dimensions_ppm = X
Spectrometer = ECK400M
Site = DELTA2_NMR
Field_strength = 9.389766 [T] (400 [MHz])
X_acquisition = 2.18365952 [s]
X_domain = 1H
X_freq = 399.78219838 [MHz]
X_offset = 4 [ppm]
X_points = 16384
X_resolution = 0.45794685 [Hz]
X_resolution_khz = 7.5030012 [kHz]
X_sweep = 1H
X_sweep_freq = 399.78219838 [MHz]
X_sweep_offset = 1 [ppm]
X_sweep_resolution = 1 [ppm]
X1_freq = 399.78219838 [MHz]
X1_offset = 5 [ppm]
X1_offset_khz = 5 [ppm]
Mod_return = FALSE
Scans = 1
Total_scans = 8
X_90_width = 10.45 [us]
X_acq_time = 2.18365952 [s]
X_angle = 45 [deg]
X_delay = 5.225 [us]
X_pulse = 5.225 [us]
X_pulse_mode = Off
X1_mode = Off
Dante_preset = FALSE
Pulprogr = 2 [s]
Relaxation_delay = 1 [s]
Relaxation_delay_khz = 3.18365952 [s]
Repetition_time = 24.4 [dc]
Temp_get =
    
```

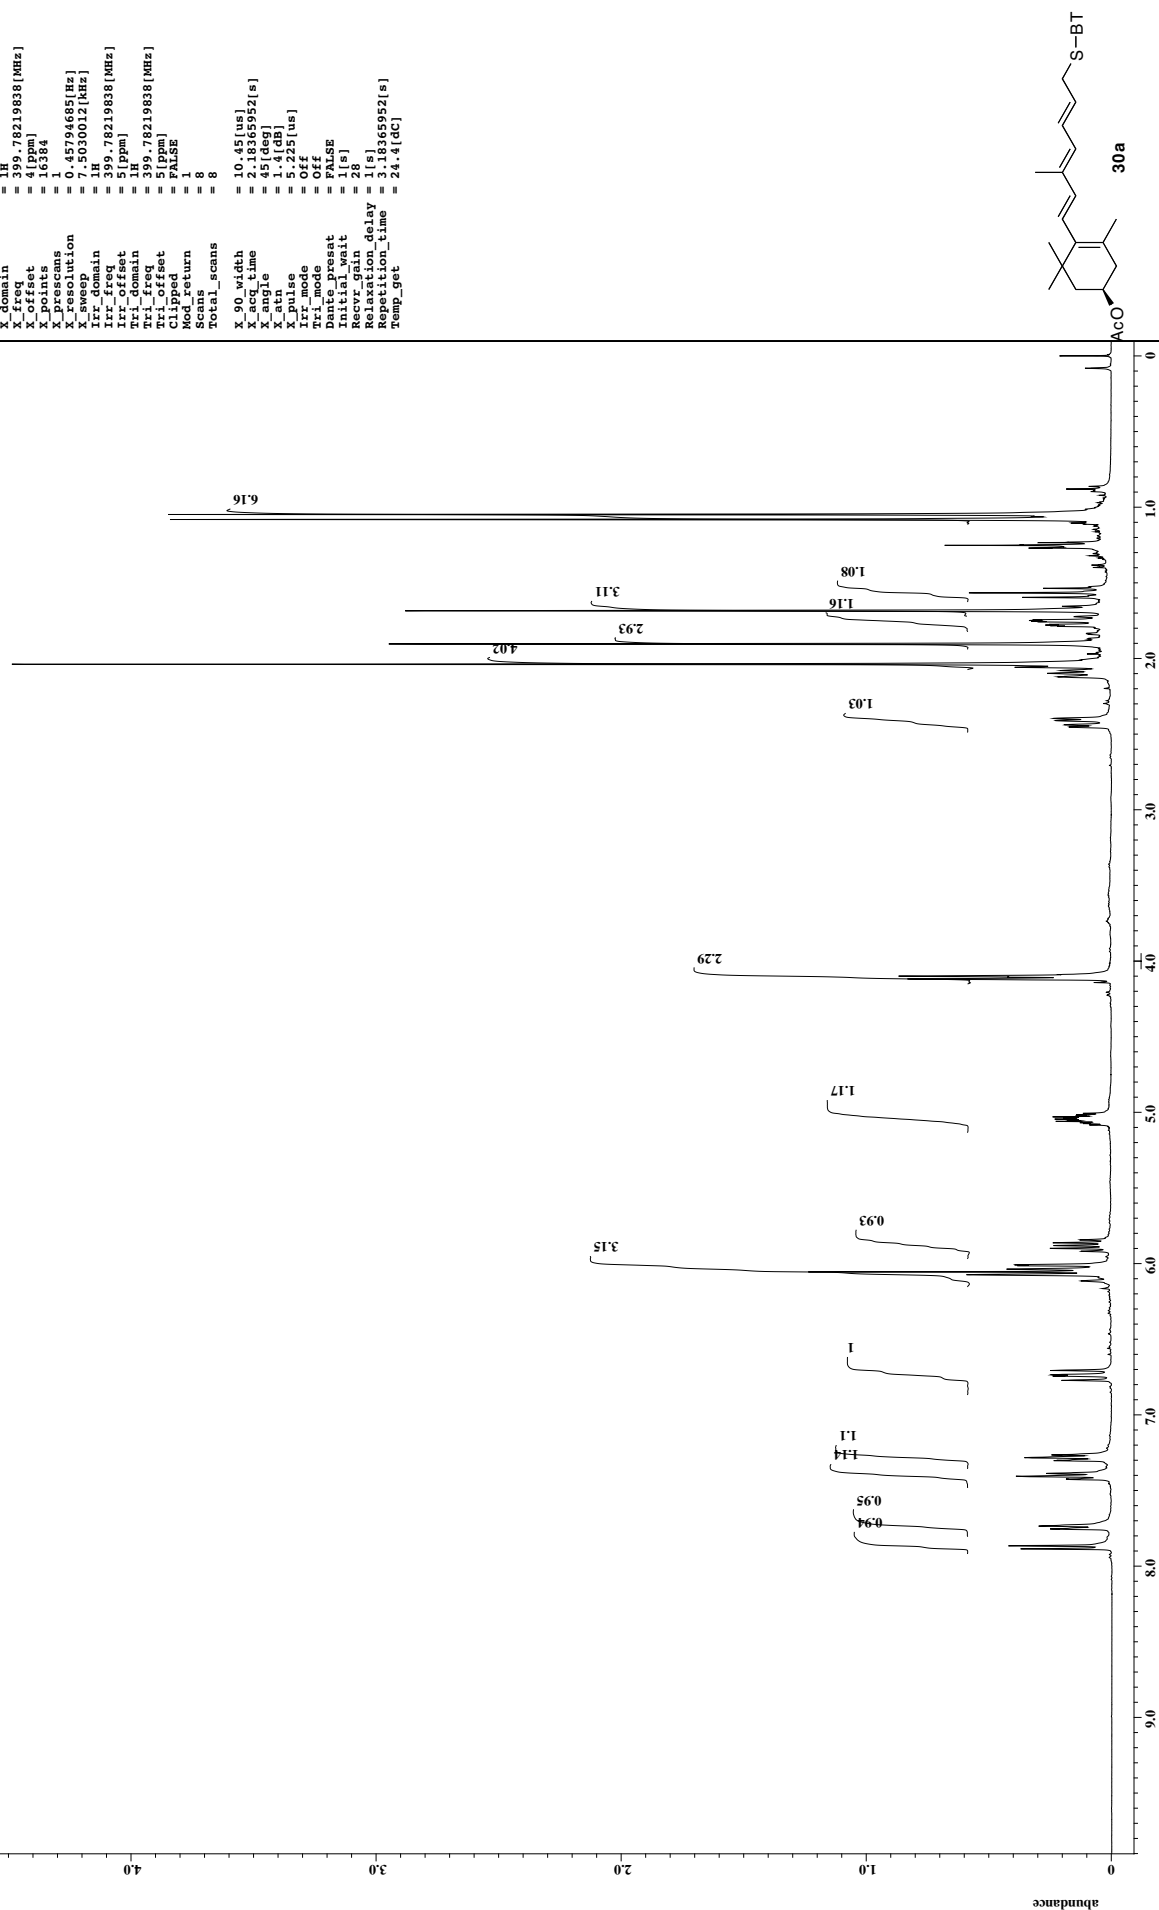

```

Filename = dl-sulfide-13c-3.jdf
Author =
Experiment = delta_pulse_dec
Sample_id = S480788
Solvent = CHLOROFORM-D
Creation_time = 14-AUG-2008 13:50:28
Revision_time = 29-OCT-2008 17:39:07
Current_time = 29-OCT-2008 17:39:28
Comment = single pulse decouple
Data_format = 1D COMPLEX
Dim_size = 26214
Dim_title = 13C
File_name =
Instruments = X
Ppm =
Spectrometer = ECK400M
Site = DELTA2_WMR
Field_strength = 9.389766[MHz] (400[MHz])
X_offset = 1.0433312[ppm]
X_domain = 13C
X_freq = 100.52530333[MHz]
X_offset = 100[ppm]
X_points = 32768
X_scans = 0.95846695[Hz]
X_resolution = 31.40703518[kHz]
X_sweep = 1H
Xr_domain = 399.78219838[MHz]
Xr_offset = 5[ppm]
Xr_points = 1
Xr_scans = 268
Xr_total_scans = 268
Xr_width = 9.2[us]
Xr_acq_time = 1.0433312[s]
X_angle = 45[deg]
X_atn = 6.6[db]
X_pulse = 4.6[us]
Xr_atn_dec = 22[db]
Xr_noise = MALZ
Decoupling = TRUE
Initial_wait = 1[s]
Noe = TRUE
Rec_time = 5[s]
Relaxation_delay = 5[s]
Repetition_time = 6.0433312[s]
Temp_get = 24.3[degC]
    
```

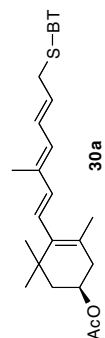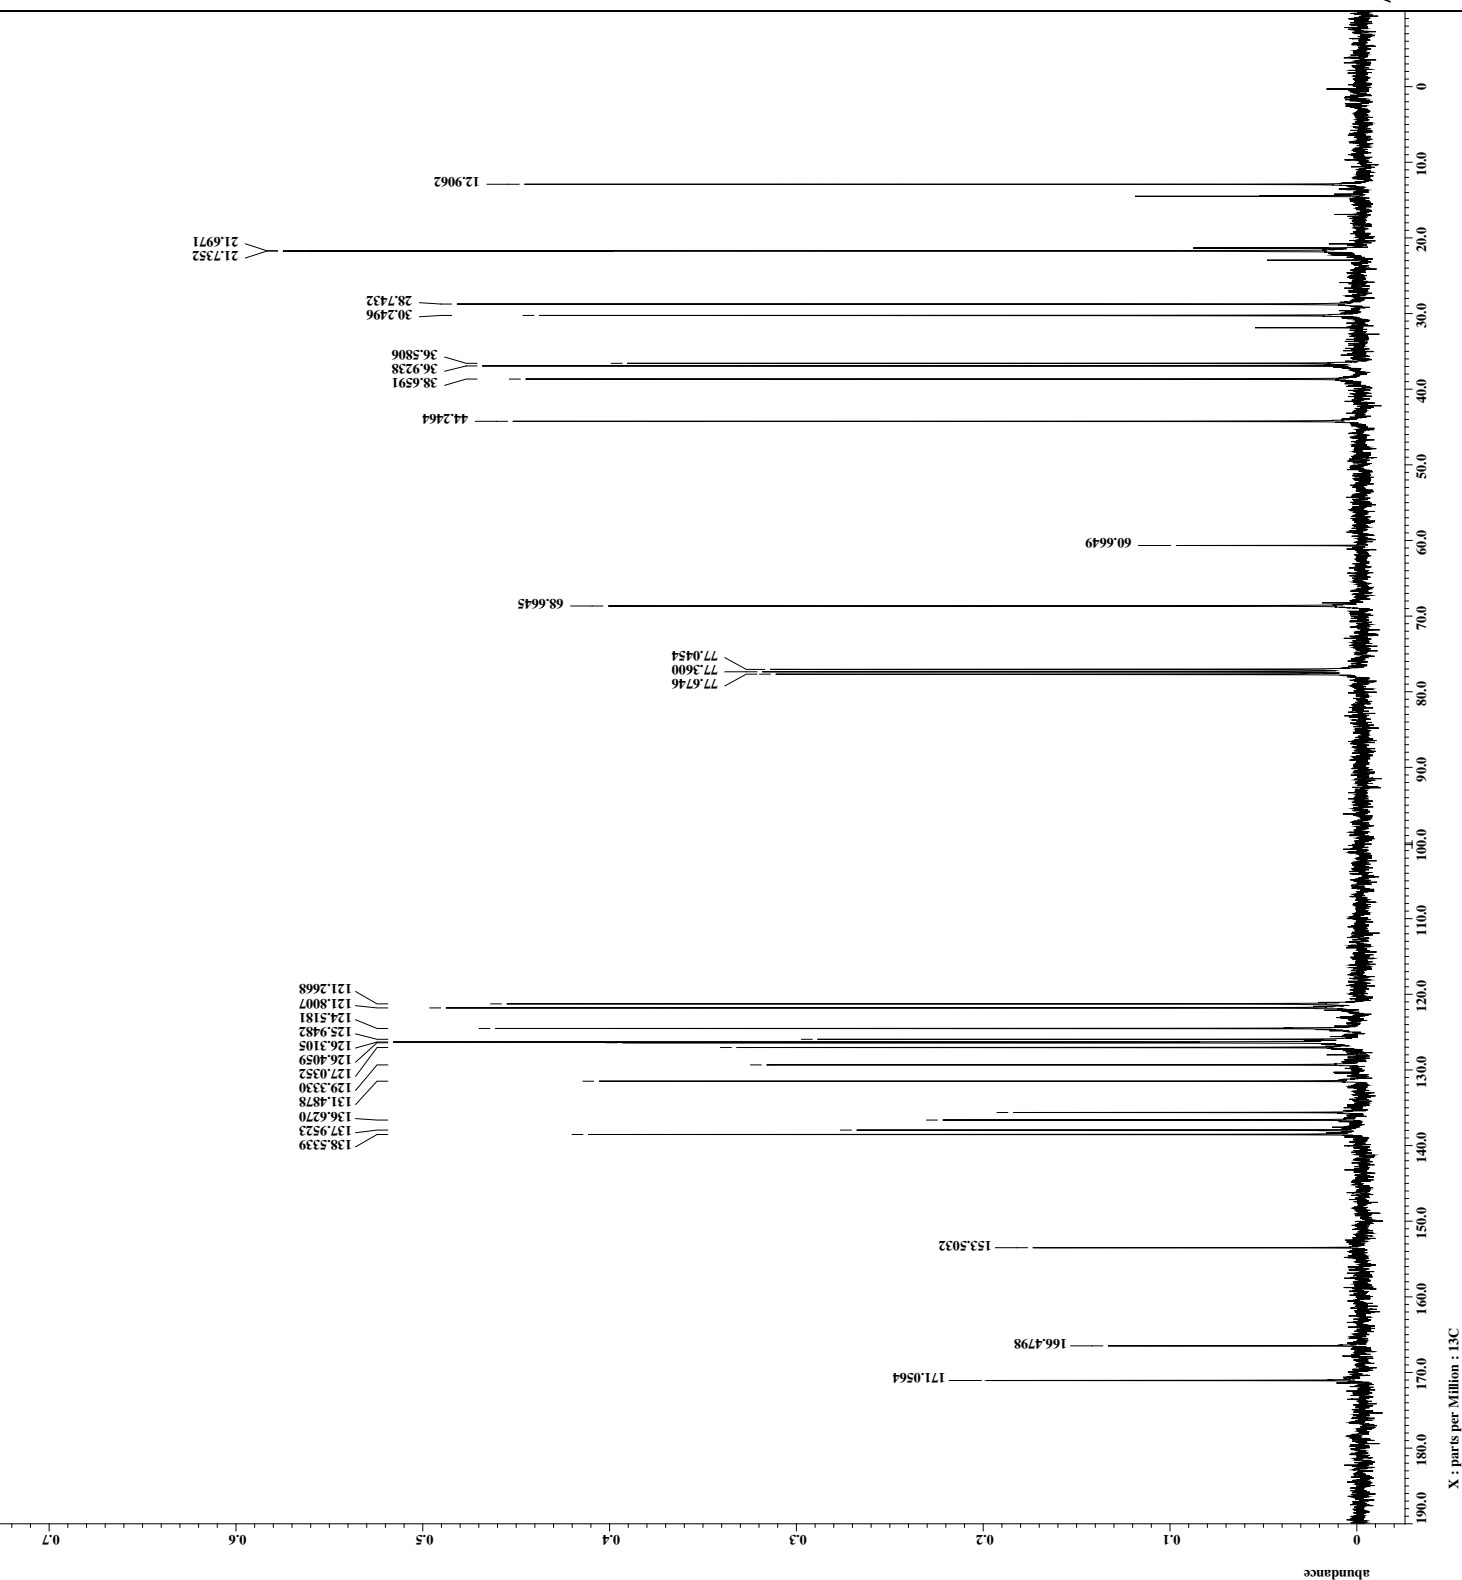

```

Filename = dl-sulfone-1H-2-j4f
Author = delta
Experiment = 1
Angle_pulse_ex2
Sample_id = CHLOROFORM-D
Solvent = CHLOROFORM-D
Creation_time = 20-AUG-2008 14:06:52
Revision_time = 30-OCT-2008 17:09:47
Current_time = 30-OCT-2008 17:10:00
Comment = single pulse
Data_format = 1D COMPLEX
Dim_size = 13107
Dim_title = 1H
Dir = X
Dimensions = X
Site = ECK400M
Spectrometer = DELTA2_NMR
Field_strength = 9.3897661 [T] (400 [MHz])
X_acquisition = 2.18365952 [s]
X_domain = 1H
X_freq = 399.78219838 [MHz]
X_offset = 4 [ppm]
X_points = 16384
X_resolution = 0.45794685 [Hz]
X_sweep = 7.5030012 [kHz]
IRF_domain = 1H
IRF_freq = 399.78219838 [MHz]
IRF_offset = 1 [ppm]
IRF_resolution = 0.45794685 [Hz]
IRF_sweep = 7.5030012 [kHz]
Tr1_freq = 399.78219838 [MHz]
Tr1_offset = 5 [ppm]
Clipped = FALSE
Mod_return = 1
Scans = 8
Total_scans = 8
X_90_width = 10.45 [us]
X_acq_time = 2.18365952 [s]
X_angle = 45 [deg]
X_delay = 5.225 [us]
X_pulse = 5.225 [us]
IRF_mode = Off
Tr1_mode = Off
Dante_preset = FALSE
Pulprogwait = 3 [s]
Relaxation_delay = 1 [s]
Repetition_time = 3.18365952 [s]
Temp_get = 24.6 [degC]
    
```

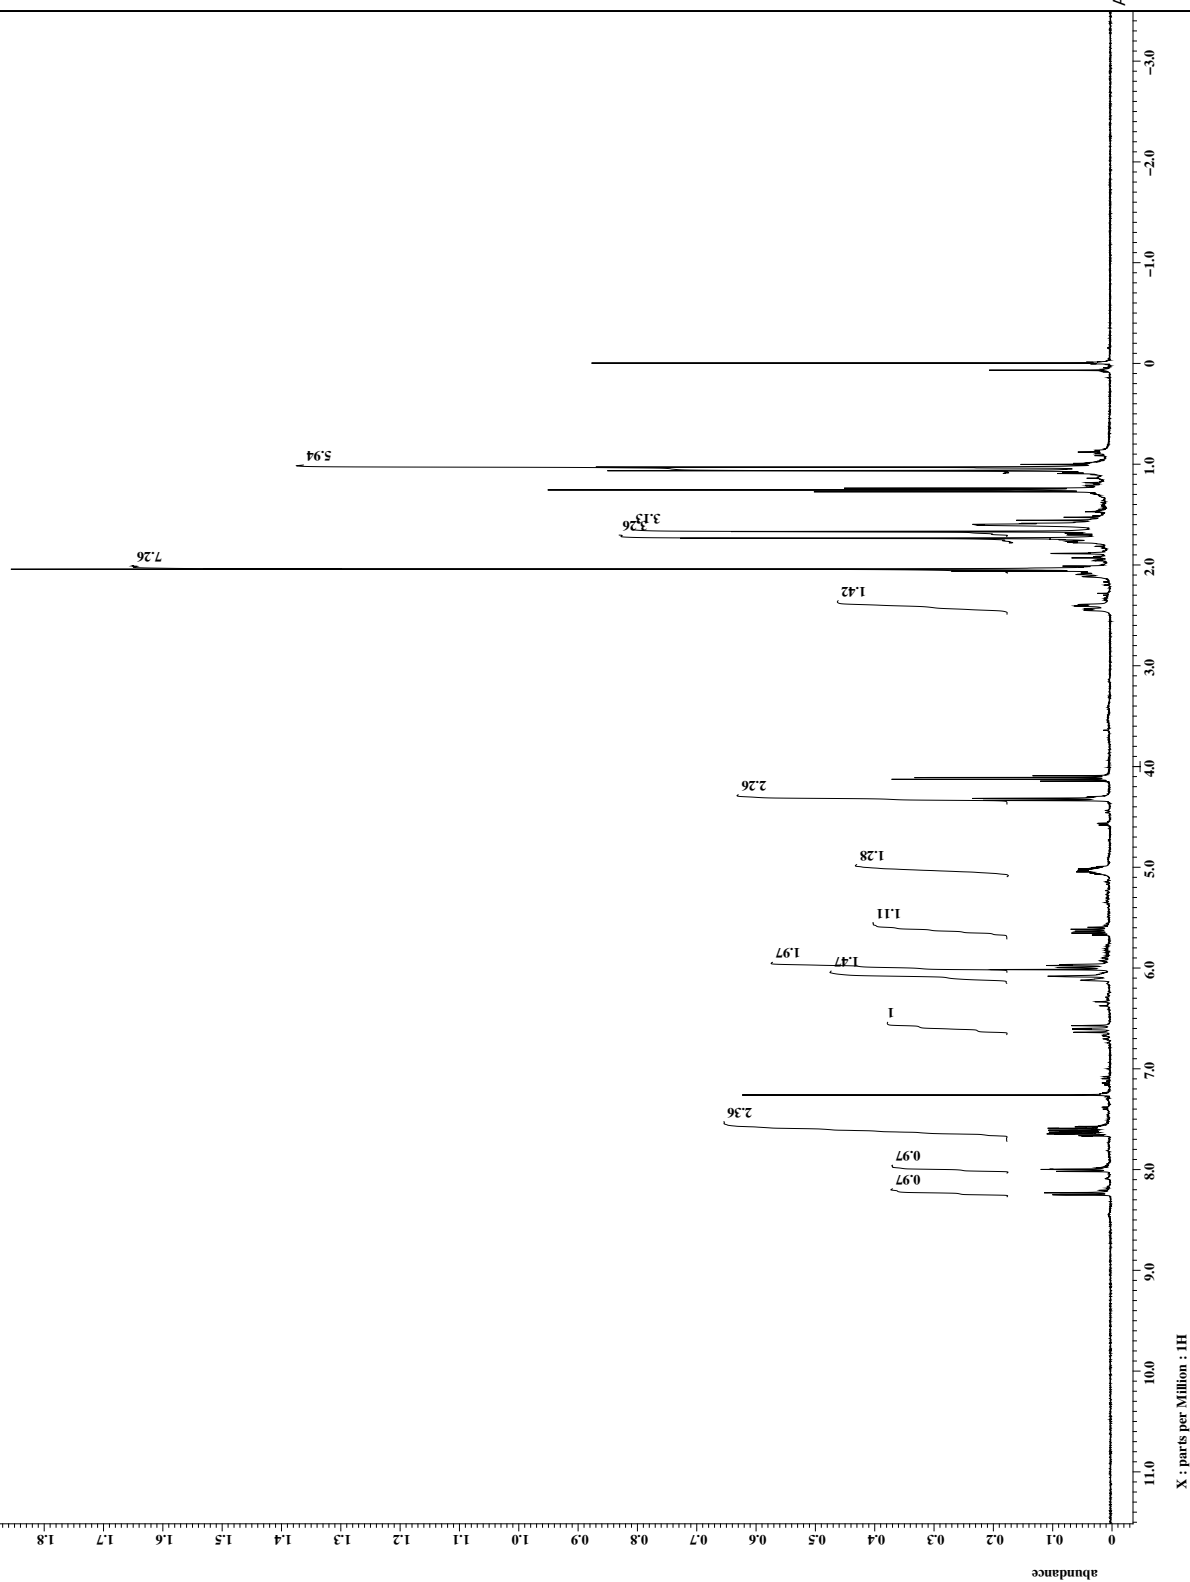

abundance

X: parts per Million : 1H

```

Filename = dl-sulfone-13c-4_3df
Author =
Experiment = delta
Pulse_program = delta_pulse_dec
Sample_id = S1573846
Solvent = CHLOROFORM-D
Creation_time = 20-AUG-2008 15:50:57
Revision_time = 29-OCT-2008 17:40:29
Current_time = 29-OCT-2008 17:40:50
Comment = single pulse decouple
Data_format = 1D COMPLEX
Dim_size = 26214
Dim_title =
Dim_x = 13C
Dimensions = X(ppm)
Site = EX400M
Spectrometer = DELTA2_WMR
Field_strength = 9.389766[T] (400[MHz])
X_nucleus = 13C
X_frequency = 100.5253033[MHz]
X_offset = 100[ppm]
X_points = 32768
X_resolution = 0.9584665[Hz]
X_sweep = 31.40703518[kHz]
IRF_domain = 1H
IRF_frequency = 399.78219838[MHz]
IRF_offset = 0[ppm]
Modulation = 1
Mod_return = 1
Total_scans = 374
X_90_width = 9.2[us]
X_acq_time = 1.0433312[s]
X_angle = 45[deg]
X_atn = 6.6[db]
X_pulse = 4.6[us]
IRF_atn_dec = 22[db]
IRF_noise = MALZ
Decoupling = TRUE
Initial_wait = 1[s]
Noe = TRUE
Relaxation_delay = 5[s]
Repetition_time = 6.0433312[s]
Temp_get = 25.2[degC]
    
```

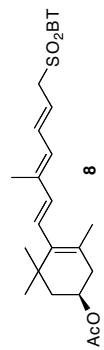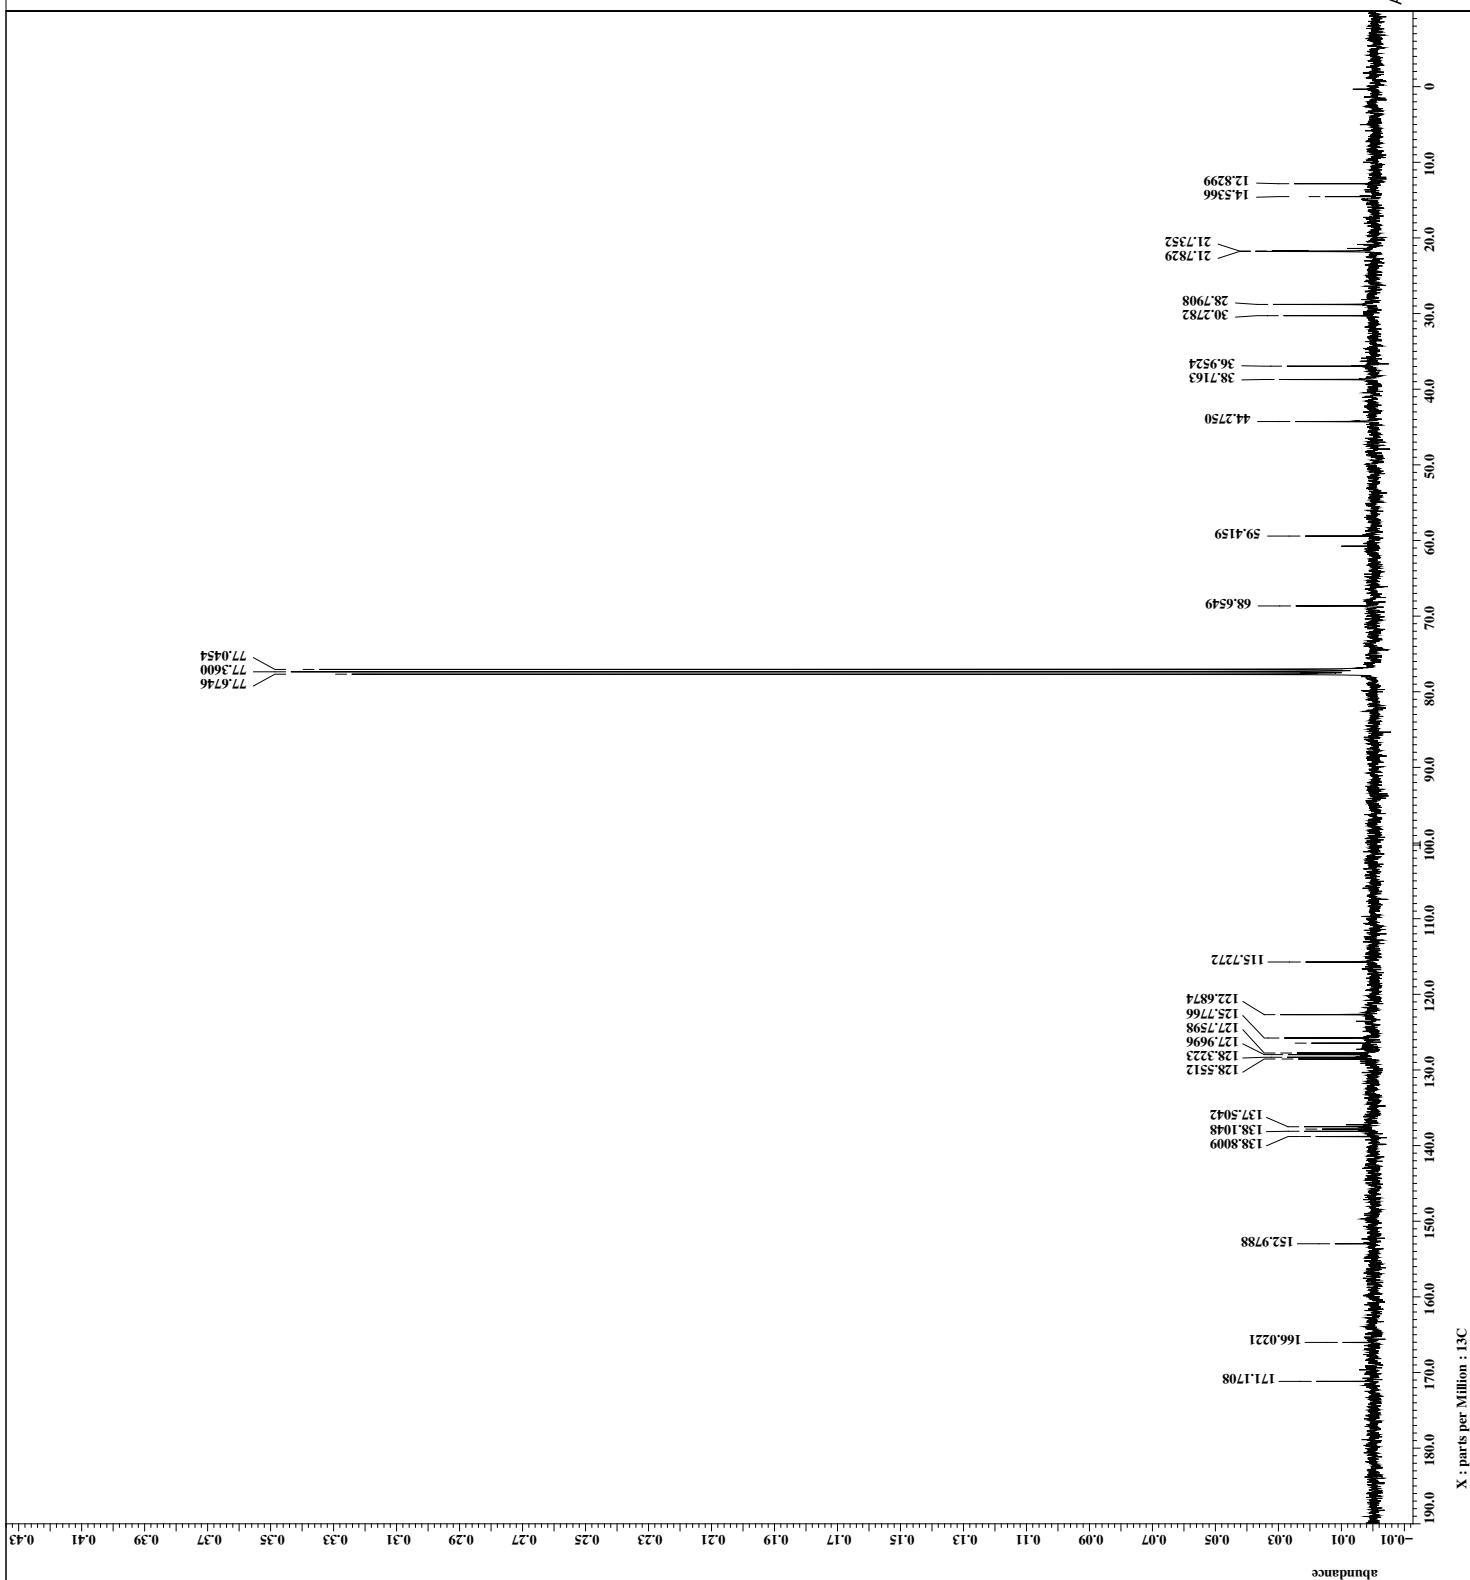

1r  
DFILE katsum750\_09.1.1  
COMNT Thu Mar 27 16:43:07 2008  
DATIM 1H  
OBNUC zg30  
EXMOD 750.13 MHz  
OBFRQ 3.60 KHz  
OBSET 0.62 Hz  
OBFIN 32768  
POINT 11261.26 Hz  
FREQU 16  
SCANS 2.9098 sec  
ACQTM 2.0000 sec  
PD 10.20 usec  
PW1  
IRNUC 26.9 c  
CTEMP  
SLVNT CDC13  
EXREF 7.16 ppm  
BF 0.30 Hz  
RGAIN 32

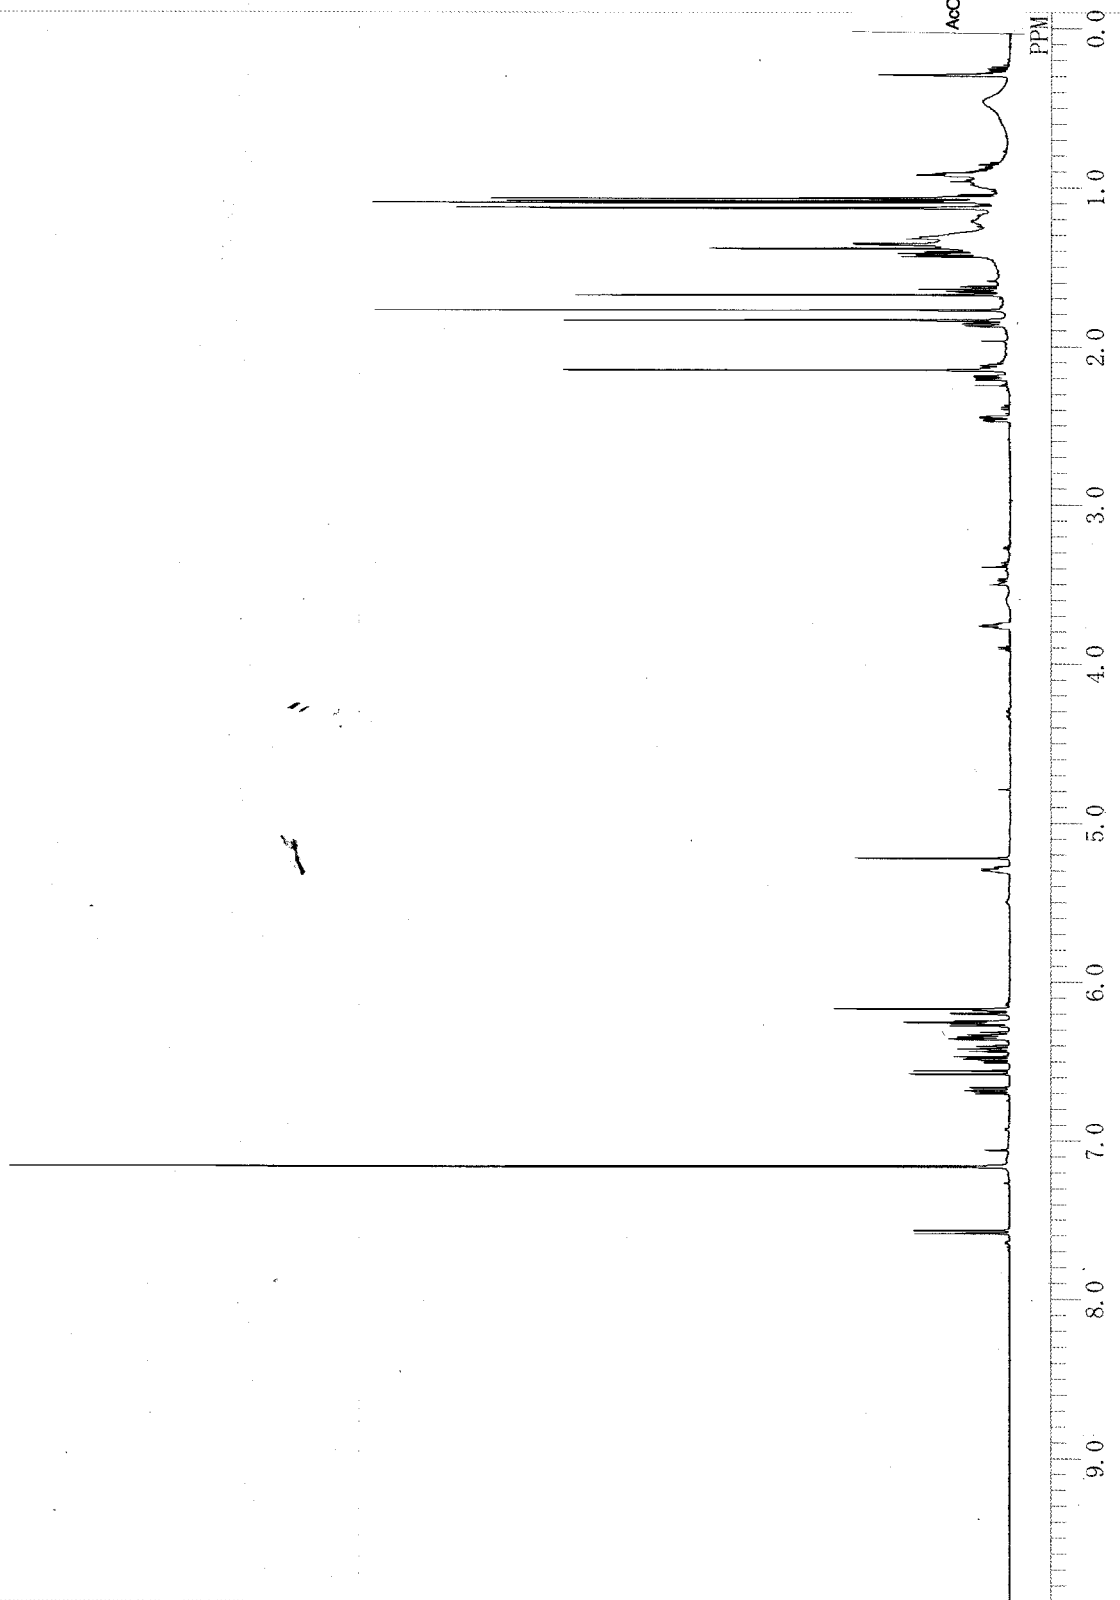

katsum750\_09.1000.1  
DFILE 1r  
COMNT katsum750\_09.1000.1  
DATIM Thu Mar 27 17:12:15 2008  
OBNUC 13C  
EXMOD zppg30  
OBFRQ 188.63 MHz  
OBSET 9.20 KHz  
OBFIN 0.56 Hz  
POINT 32768  
FREQU 45045.05 Hz  
SCANS 8192  
ACQTM 0.7275 sec  
PD 2.0000 sec  
PW1 15.00 usec  
IRNUC 26.9 c  
CTEMP  
SLVNT CDCl3  
EXREF 219.62 ppm  
BF 1.00 Hz  
RGAIN 8192

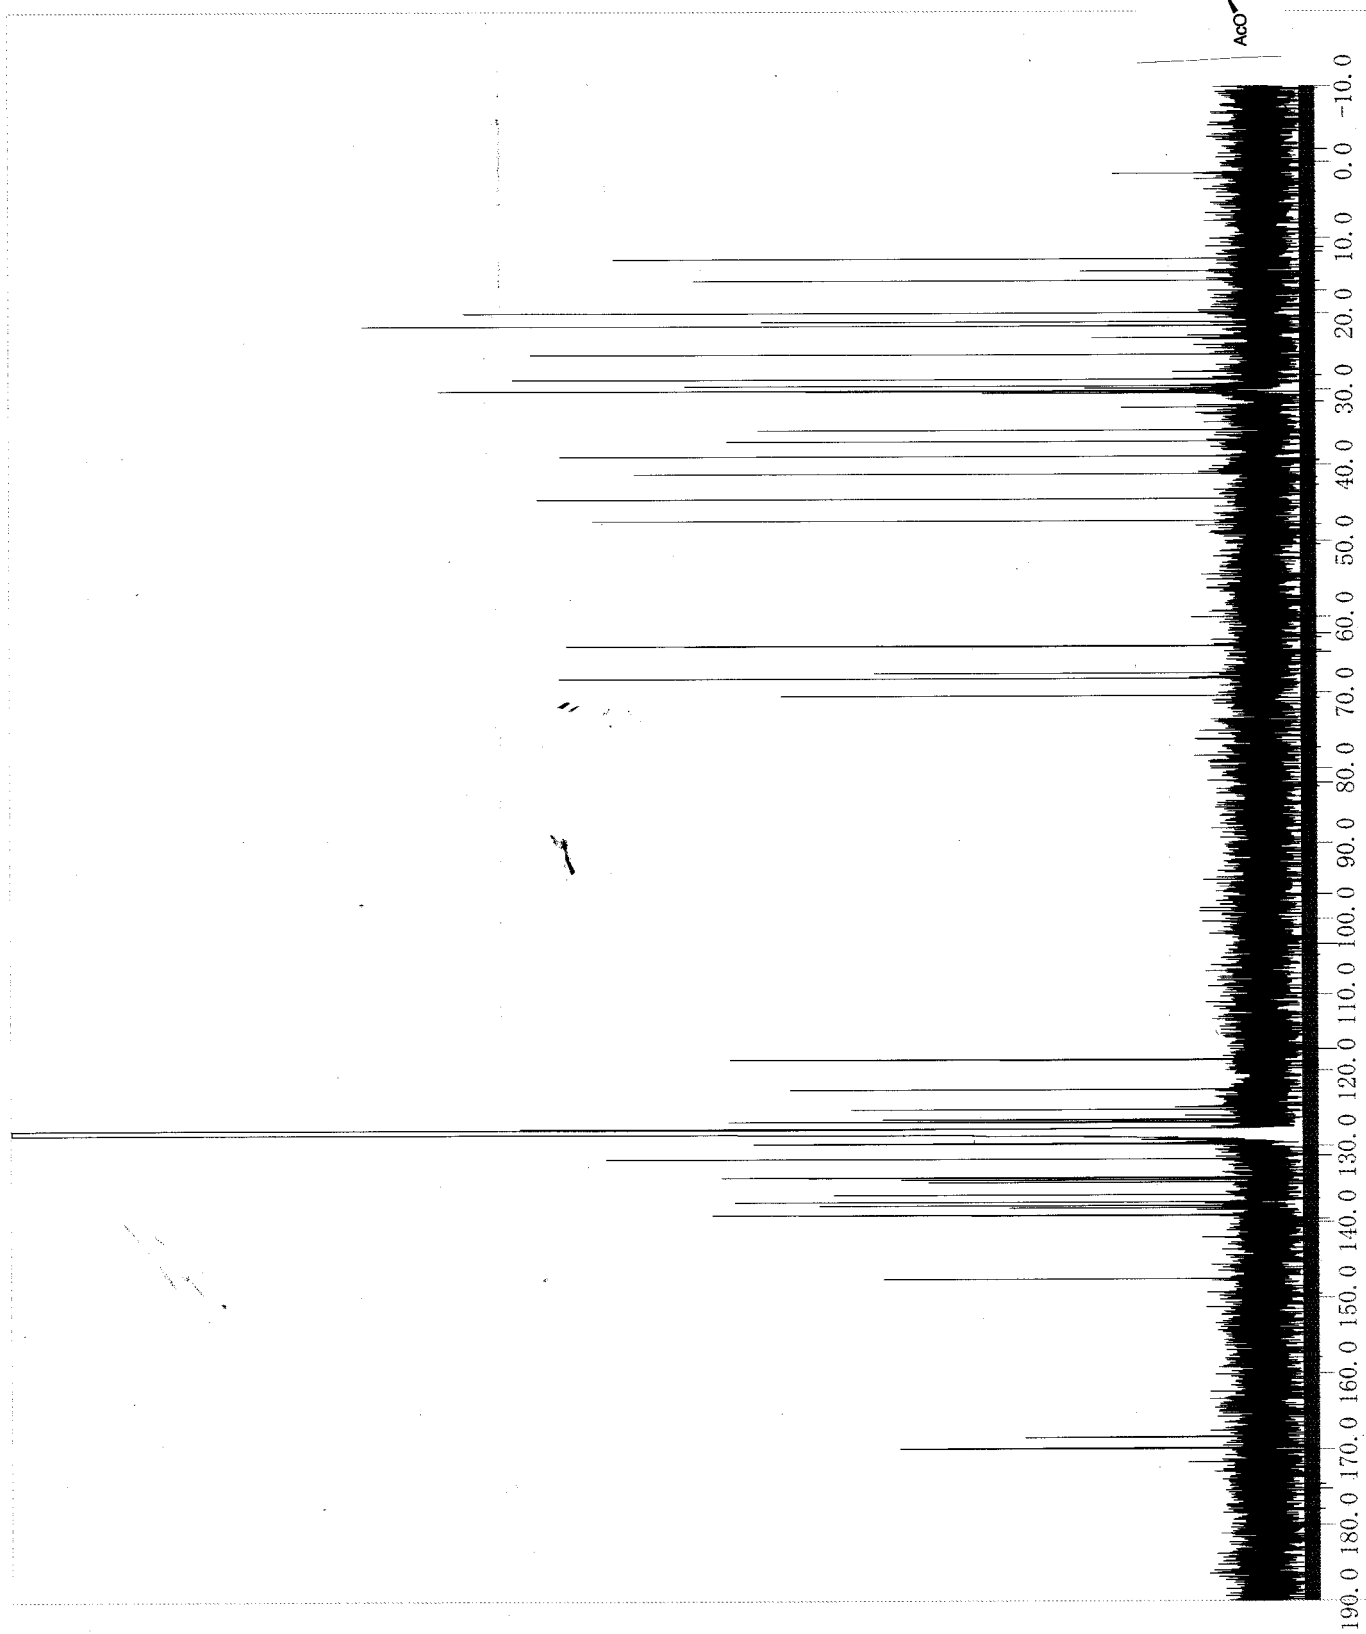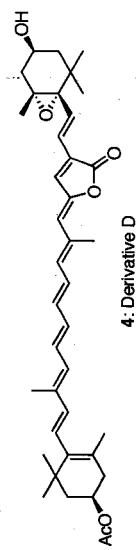

Supplement: b907456b.pdf [file b907456b.pdf]
